# Supplementary material for: Pilot study of large-scale production of mutant pigs by ENU mutagenesis
Source: eLife. 2017 Jun 22;6:e26248. doi: 10.7554/eLife.26248 (PMC5505698; doi:10.7554/eLife.26248)
Supplement: Figure 1—source data 1. — DOI: http://dx.doi.org/10.7554/eLife.26248.003 [file elife-26248-fig1-data1.xlsx]

## Sheet: sheet1
Chr	Position	Reference	ENU induced mutations
1	1635403	T	C
1	9417454	C	G
1	122920757	C	A
1	122920757	C	T
1	138356596	G	C
1	186722872	A	G
1	212977383	C	T
1	212977383	C	G
1	240615359	C	T
1	288094688	G	A
2	2966862	C	A
2	8160315	C	A
2	44386806	A	T
2	47208729	C	T
2	59278050	G	A
2	86983600	A	G
2	152402466	T	C
3	1959947	G	C
3	6645508	A	G
3	11673562	G	C
3	13052569	G	C
3	72706512	G	T
3	72706512	G	A
3	76663354	C	A
3	90776942	T	C
3	92061513	C	G
3	92823291	C	T
3	117951637	G	C
3	120686039	G	A
3	120686039	G	C
3	126463415	C	T
3	128159076	T	C
3	129000990	G	A
3	129910907	G	A
3	134264775	A	G
4	4515094	G	C
4	7562644	G	A
4	66104311	T	A
4	82701865	C	G
4	112496459	T	C
4	134987613	A	G
4	142885600	G	A
5	36147	T	C
5	8539916	T	C
5	11401480	G	A
5	15356723	G	A
5	67592559	G	C
5	69502794	G	T
5	79882815	G	A
5	93681876	G	A
5	100701023	G	A
5	105251115	C	T
6	24325527	C	G
6	29270831	T	C
6	34423113	A	C
6	35741625	C	T
6	40929031	G	A
6	49139102	C	G
6	51655436	G	A
6	65049407	T	G
6	65563647	G	A
6	65563647	G	T
6	65728999	C	T
6	67566763	G	A
6	74597022	G	A
6	77477009	A	G
6	77477009	A	T
6	83802157	G	A
6	136819168	G	A
6	146734350	A	G
6	156170866	A	C
7	1839779	A	G
7	3541498	G	A
7	11490169	G	T
7	45141153	G	A
7	54796261	G	A
7	59394959	G	A
7	99038734	C	T
7	101586759	G	A
7	103998375	C	T
7	106189560	T	C
7	116241418	T	C
8	5210241	C	T
8	10063842	T	C
9	31413505	A	G
9	55749160	G	T
9	90580773	A	G
9	128008985	C	A
9	138445654	A	G
10	21930640	T	C
10	25253257	A	G
10	30134091	T	A
10	52603843	G	A
10	52719495	G	A
10	57487371	A	G
10	63685478	G	A
11	2953236	T	G
11	9547397	G	A
11	24522345	G	A
11	74435292	T	C
11	76646310	C	T
11	80341213	T	C
11	81756673	T	C
11	83905108	C	T
12	4260342	C	T
12	62878282	G	A
13	128731	C	T
13	18691022	G	C
13	31134082	T	C
13	32569591	C	A
13	44350301	T	C
13	50583790	T	A
13	193315569	A	G
13	196730575	C	T
14	1087685	G	A
14	8619808	T	C
14	12626287	T	C
14	133452551	G	A
15	28035541	C	T
15	30218849	G	A
15	39088820	C	T
15	51924399	A	G
15	128405711	T	A
15	132869846	T	C
15	132869846	T	A
15	135237441	C	T
15	138576958	T	A
15	140667979	A	T
15	140667980	C	T
15	148969694	A	G
15	150575063	A	C
15	150575063	A	G
15	153510593	A	G
16	3800993	G	A
16	46582403	G	A
16	74683944	T	C
16	83551869	A	T
17	31222568	G	A
17	31222568	G	T
17	37347296	G	A
17	39182853	A	G
17	42122364	T	C
17	45978108	A	G
17	50142403	C	T
17	50602794	T	C
17	55223339	C	T
17	60963958	T	C
18	2381445	C	T
18	6044401	A	G
18	6418285	A	T
18	7756419	C	T
18	20698092	A	G
18	20698092	A	T
18	27642824	T	G
18	54675023	T	A
18	55004356	G	A
18	55729965	C	T
18	59689640	G	A
18	60063909	A	G
GL892517.1	23274	T	C
GL893798.2	121972	C	T
GL893957.1	10421	A	G
GL893957.1	10421		T
GL893969.1	10753	A	G
GL894470.1	32494	T	A
GL894740.1	16773	G	C
GL894750.2	102987	G	A
GL895033.1	100	G	A
GL895629.1	11852	T	C
GL895865.1	32437	C	T
