# Supplementary material for: Pilot study of large-scale production of mutant pigs by ENU mutagenesis
Source: eLife. 2017 Jun 22;6:e26248. doi: 10.7554/eLife.26248 (PMC5505698; doi:10.7554/eLife.26248)
Supplement: Figure 4—source data 1. — DOI: http://dx.doi.org/10.7554/eLife.26248.010 [file elife-26248-fig4-data1.xlsx]

## Sheet: merlin-parametric
CHR	POS	LABEL (Mb)	MODEL	LOD score
1	0.0029	0.287	Dominant_Model	-5.7451
1	0.0129	1.287	Dominant_Model	-16.6158
1	0.0229	2.287	Dominant_Model	-19.5654
1	0.0329	3.287	Dominant_Model	-20.9642
1	0.0429	4.287	Dominant_Model	-19.1244
1	0.0529	5.287	Dominant_Model	-20.8926
1	0.0629	6.287	Dominant_Model	-20.9286
1	0.0729	7.287	Dominant_Model	-19.8166
1	0.0829	8.287	Dominant_Model	-10.0767
1	0.0929	9.287	Dominant_Model	-11.0947
1	0.1029	10.287	Dominant_Model	-13.9032
1	0.1129	11.287	Dominant_Model	-15.7128
1	0.1229	12.287	Dominant_Model	-20.6549
1	0.1329	13.287	Dominant_Model	-15.2833
1	0.1429	14.287	Dominant_Model	-15.9203
1	0.1529	15.287	Dominant_Model	-19.9627
1	0.1629	16.287	Dominant_Model	-20.9893
1	0.1729	17.287	Dominant_Model	-20.9897
1	0.1829	18.287	Dominant_Model	-20.9767
1	0.1929	19.287	Dominant_Model	-20.9897
1	0.2029	20.287	Dominant_Model	-20.9773
1	0.2129	21.287	Dominant_Model	-20.9896
1	0.2229	22.287	Dominant_Model	-20.9897
1	0.2329	23.287	Dominant_Model	-20.9897
1	0.2429	24.287	Dominant_Model	-20.9882
1	0.2529	25.287	Dominant_Model	-18.769
1	0.2629	26.287	Dominant_Model	-20.9655
1	0.2729	27.287	Dominant_Model	-20.9604
1	0.2829	28.287	Dominant_Model	-20.9867
1	0.2929	29.287	Dominant_Model	-20.9766
1	0.3029	30.287	Dominant_Model	-20.9891
1	0.3129	31.287	Dominant_Model	-20.8277
1	0.3229	32.287	Dominant_Model	-20.9805
1	0.3329	33.287	Dominant_Model	-19.9502
1	0.3429	34.287	Dominant_Model	-20.9771
1	0.3529	35.287	Dominant_Model	-20.9886
1	0.3629	36.287	Dominant_Model	-20.8779
1	0.3729	37.287	Dominant_Model	-19.1416
1	0.3829	38.287	Dominant_Model	-20.5917
1	0.3929	39.287	Dominant_Model	-12.7925
1	0.4029	40.287	Dominant_Model	-11.6151
1	0.4129	41.287	Dominant_Model	-11.2874
1	0.4229	42.287	Dominant_Model	-11.4531
1	0.4329	43.287	Dominant_Model	-12.2125
1	0.4429	44.287	Dominant_Model	-14.5155
1	0.4529	45.287	Dominant_Model	-16.78
1	0.4629	46.287	Dominant_Model	-16.5278
1	0.4729	47.287	Dominant_Model	-18.4968
1	0.4829	48.287	Dominant_Model	-19.6601
1	0.4929	49.287	Dominant_Model	-20.8111
1	0.5029	50.287	Dominant_Model	-17.9351
1	0.5129	51.287	Dominant_Model	-19.8799
1	0.5229	52.287	Dominant_Model	-20.6991
1	0.5329	53.287	Dominant_Model	-20.9641
1	0.5429	54.287	Dominant_Model	-19.9661
1	0.5529	55.287	Dominant_Model	-20.9897
1	0.5629	56.287	Dominant_Model	-20.9897
1	0.5729	57.287	Dominant_Model	-20.9881
1	0.5829	58.287	Dominant_Model	-20.9897
1	0.5929	59.287	Dominant_Model	-20.9897
1	0.6029	60.287	Dominant_Model	-20.9897
1	0.6129	61.287	Dominant_Model	-19.1979
1	0.6229	62.287	Dominant_Model	-20.9444
1	0.6329	63.287	Dominant_Model	-20.9893
1	0.6429	64.287	Dominant_Model	-20.4661
1	0.6529	65.287	Dominant_Model	-18.7951
1	0.6629	66.287	Dominant_Model	-19.586
1	0.6729	67.287	Dominant_Model	-18.457
1	0.6829	68.287	Dominant_Model	-20.9686
1	0.6929	69.287	Dominant_Model	-20.9878
1	0.7029	70.287	Dominant_Model	-17.6471
1	0.7129	71.287	Dominant_Model	-16.4851
1	0.7229	72.287	Dominant_Model	-19.3804
1	0.7329	73.287	Dominant_Model	-20.8501
1	0.7429	74.287	Dominant_Model	-18.2613
1	0.7529	75.287	Dominant_Model	-19.944
1	0.7629	76.287	Dominant_Model	-20.9848
1	0.7729	77.287	Dominant_Model	-15.3207
1	0.7829	78.287	Dominant_Model	-17.587
1	0.7929	79.287	Dominant_Model	-16.3773
1	0.8029	80.287	Dominant_Model	-20.8209
1	0.8129	81.287	Dominant_Model	-20.9775
1	0.8229	82.287	Dominant_Model	-20.9663
1	0.8329	83.287	Dominant_Model	-19.8772
1	0.8429	84.287	Dominant_Model	-20.9896
1	0.8529	85.287	Dominant_Model	-17.8814
1	0.8629	86.287	Dominant_Model	-16.751
1	0.8729	87.287	Dominant_Model	-19.7364
1	0.8829	88.287	Dominant_Model	-19.8911
1	0.8929	89.287	Dominant_Model	-17.2639
1	0.9029	90.287	Dominant_Model	-16.7979
1	0.9129	91.287	Dominant_Model	-20.3485
1	0.9229	92.287	Dominant_Model	-20.9756
1	0.9329	93.287	Dominant_Model	-20.9558
1	0.9429	94.287	Dominant_Model	-20.5035
1	0.9529	95.287	Dominant_Model	-20.4028
1	0.9629	96.287	Dominant_Model	-17.5931
1	0.9729	97.287	Dominant_Model	-19.2521
1	0.9829	98.287	Dominant_Model	-18.5682
1	0.9929	99.287	Dominant_Model	-20.9893
1	1.0029	100.287	Dominant_Model	-17.1212
1	1.0129	101.287	Dominant_Model	-15.6436
1	1.0229	102.287	Dominant_Model	-18.653
1	1.0329	103.287	Dominant_Model	-12.3957
1	1.0429	104.287	Dominant_Model	-12.4664
1	1.0529	105.287	Dominant_Model	-20.6784
1	1.0629	106.287	Dominant_Model	-17.0934
1	1.0729	107.287	Dominant_Model	-20.2268
1	1.0829	108.287	Dominant_Model	-16.8365
1	1.0929	109.287	Dominant_Model	-20.5736
1	1.1029	110.287	Dominant_Model	-20.4862
1	1.1129	111.287	Dominant_Model	-15.7637
1	1.1229	112.287	Dominant_Model	-20.5566
1	1.1329	113.287	Dominant_Model	-16.8402
1	1.1429	114.287	Dominant_Model	-14.9065
1	1.1529	115.287	Dominant_Model	-20.471
1	1.1629	116.287	Dominant_Model	-12.6722
1	1.1729	117.287	Dominant_Model	-14.174
1	1.1829	118.287	Dominant_Model	-11.7491
1	1.1929	119.287	Dominant_Model	-11.1532
1	1.2029	120.287	Dominant_Model	-15.0615
1	1.2129	121.287	Dominant_Model	-13.4163
1	1.2229	122.287	Dominant_Model	-13.0845
1	1.2329	123.287	Dominant_Model	-11.8114
1	1.2429	124.287	Dominant_Model	-13.0483
1	1.2529	125.287	Dominant_Model	-11.5038
1	1.2629	126.287	Dominant_Model	-11.0468
1	1.2729	127.287	Dominant_Model	-11.558
1	1.2829	128.287	Dominant_Model	-9.4999
1	1.2929	129.287	Dominant_Model	-13.9148
1	1.3029	130.287	Dominant_Model	-14.7616
1	1.3129	131.287	Dominant_Model	-8.9096
1	1.3229	132.287	Dominant_Model	-11.2496
1	1.3329	133.287	Dominant_Model	-13.0568
1	1.3429	134.287	Dominant_Model	-13.8477
1	1.3529	135.287	Dominant_Model	-1.8758
1	1.3629	136.287	Dominant_Model	-3.3552
1	1.3729	137.287	Dominant_Model	-11.757
1	1.3829	138.287	Dominant_Model	-8.0539
1	1.3929	139.287	Dominant_Model	-5.0786
1	1.4029	140.287	Dominant_Model	-5.6575
1	1.4129	141.287	Dominant_Model	-2.4578
1	1.4229	142.287	Dominant_Model	-2.6733
1	1.4329	143.287	Dominant_Model	-2.215
1	1.4429	144.287	Dominant_Model	-7.1256
1	1.4529	145.287	Dominant_Model	-4.7136
1	1.4629	146.287	Dominant_Model	-5.3444
1	1.4729	147.287	Dominant_Model	-6.3643
1	1.4829	148.287	Dominant_Model	-2.3376
1	1.4929	149.287	Dominant_Model	-2.1501
1	1.5029	150.287	Dominant_Model	-3.2688
1	1.5129	151.287	Dominant_Model	-4.1167
1	1.5229	152.287	Dominant_Model	-5.4818
1	1.5329	153.287	Dominant_Model	-7.5395
1	1.5429	154.287	Dominant_Model	-7.2762
1	1.5529	155.287	Dominant_Model	-6.8533
1	1.5629	156.287	Dominant_Model	-8.6629
1	1.5729	157.287	Dominant_Model	-8.2465
1	1.5829	158.287	Dominant_Model	-5.99
1	1.5929	159.287	Dominant_Model	-7.2795
1	1.6029	160.287	Dominant_Model	-5.0775
1	1.6129	161.287	Dominant_Model	-4.9026
1	1.6229	162.287	Dominant_Model	-7.5928
1	1.6329	163.287	Dominant_Model	1.802
1	1.6429	164.287	Dominant_Model	-3.3188
1	1.6529	165.287	Dominant_Model	-1.3436
1	1.6629	166.287	Dominant_Model	-1.4669
1	1.6729	167.287	Dominant_Model	-7.8209
1	1.6829	168.287	Dominant_Model	-5.9048
1	1.6929	169.287	Dominant_Model	-6.3349
1	1.7029	170.287	Dominant_Model	-8.2008
1	1.7129	171.287	Dominant_Model	-5.5434
1	1.7229	172.287	Dominant_Model	-8.6454
1	1.7329	173.287	Dominant_Model	-8.675
1	1.7429	174.287	Dominant_Model	-5.4649
1	1.7529	175.287	Dominant_Model	-7.3333
1	1.7629	176.287	Dominant_Model	-8.5904
1	1.7729	177.287	Dominant_Model	-6.3045
1	1.7829	178.287	Dominant_Model	-7.9232
1	1.7929	179.287	Dominant_Model	-7.6488
1	1.8029	180.287	Dominant_Model	-8.0179
1	1.8129	181.287	Dominant_Model	-7.1706
1	1.8229	182.287	Dominant_Model	-6.6448
1	1.8329	183.287	Dominant_Model	-2.2504
1	1.8429	184.287	Dominant_Model	-2.8437
1	1.8529	185.287	Dominant_Model	-2.6861
1	1.8629	186.287	Dominant_Model	-2.1918
1	1.8729	187.287	Dominant_Model	-2.149
1	1.8829	188.287	Dominant_Model	-6.0845
1	1.8929	189.287	Dominant_Model	-7.7804
1	1.9029	190.287	Dominant_Model	-8.3449
1	1.9129	191.287	Dominant_Model	-4.3265
1	1.9229	192.287	Dominant_Model	-4.2681
1	1.9329	193.287	Dominant_Model	-3.4757
1	1.9429	194.287	Dominant_Model	-3.2821
1	1.9529	195.287	Dominant_Model	-3.3527
1	1.9629	196.287	Dominant_Model	-3.7771
1	1.9729	197.287	Dominant_Model	-7.7267
1	1.9829	198.287	Dominant_Model	-5.2574
1	1.9929	199.287	Dominant_Model	-5.8638
1	2.0029	200.287	Dominant_Model	-7.5282
1	2.0129	201.287	Dominant_Model	-9.8903
1	2.0229	202.287	Dominant_Model	-9.6173
1	2.0329	203.287	Dominant_Model	-8.0562
1	2.0429	204.287	Dominant_Model	-7.9022
1	2.0529	205.287	Dominant_Model	-6.3061
1	2.0629	206.287	Dominant_Model	-10.9461
1	2.0729	207.287	Dominant_Model	-7.3064
1	2.0829	208.287	Dominant_Model	-5.3396
1	2.0929	209.287	Dominant_Model	-5.4566
1	2.1029	210.287	Dominant_Model	-5.5409
1	2.1129	211.287	Dominant_Model	-9.42
1	2.1229	212.287	Dominant_Model	-5.515
1	2.1329	213.287	Dominant_Model	-6.5218
1	2.1429	214.287	Dominant_Model	-6.2999
1	2.1529	215.287	Dominant_Model	-9.5473
1	2.1629	216.287	Dominant_Model	-7.5542
1	2.1729	217.287	Dominant_Model	-6.7418
1	2.1829	218.287	Dominant_Model	-5.9254
1	2.1929	219.287	Dominant_Model	-5.9424
1	2.2029	220.287	Dominant_Model	-8.466
1	2.2129	221.287	Dominant_Model	-8.6781
1	2.2229	222.287	Dominant_Model	-10.9035
1	2.2329	223.287	Dominant_Model	-5.1114
1	2.2429	224.287	Dominant_Model	-10.3572
1	2.2529	225.287	Dominant_Model	-4.619
1	2.2629	226.287	Dominant_Model	-4.6854
1	2.2729	227.287	Dominant_Model	-10.1196
1	2.2829	228.287	Dominant_Model	-5.6068
1	2.2929	229.287	Dominant_Model	-6.8287
1	2.3029	230.287	Dominant_Model	-7.2146
1	2.3129	231.287	Dominant_Model	-9.3961
1	2.3229	232.287	Dominant_Model	-6.7216
1	2.3329	233.287	Dominant_Model	-9.1997
1	2.3429	234.287	Dominant_Model	-7.1659
1	2.3529	235.287	Dominant_Model	-4.0789
1	2.3629	236.287	Dominant_Model	-3.5431
1	2.3729	237.287	Dominant_Model	-3.473
1	2.3829	238.287	Dominant_Model	-3.7454
1	2.3929	239.287	Dominant_Model	-5.3659
1	2.4029	240.287	Dominant_Model	-6.1224
1	2.4129	241.287	Dominant_Model	-6.6942
1	2.4229	242.287	Dominant_Model	-8.609
1	2.4329	243.287	Dominant_Model	-7.253
1	2.4429	244.287	Dominant_Model	-4.7202
1	2.4529	245.287	Dominant_Model	-5.3563
1	2.4629	246.287	Dominant_Model	-6.1243
1	2.4729	247.287	Dominant_Model	-8.1225
1	2.4829	248.287	Dominant_Model	-7.3772
1	2.4929	249.287	Dominant_Model	-7.9558
1	2.5029	250.287	Dominant_Model	-7.2987
1	2.5129	251.287	Dominant_Model	-5.9484
1	2.5229	252.287	Dominant_Model	-5.4064
1	2.5329	253.287	Dominant_Model	-5.8966
1	2.5429	254.287	Dominant_Model	-7.8557
1	2.5529	255.287	Dominant_Model	-8.6377
1	2.5629	256.287	Dominant_Model	-7.3713
1	2.5729	257.287	Dominant_Model	-9.2555
1	2.5829	258.287	Dominant_Model	-6.1986
1	2.5929	259.287	Dominant_Model	-6.4862
1	2.6029	260.287	Dominant_Model	-6.6884
1	2.6129	261.287	Dominant_Model	-6.1914
1	2.6229	262.287	Dominant_Model	-6.0155
1	2.6329	263.287	Dominant_Model	-7.1343
1	2.6429	264.287	Dominant_Model	-4.888
1	2.6529	265.287	Dominant_Model	-6.5537
1	2.6629	266.287	Dominant_Model	-9.6987
1	2.6729	267.287	Dominant_Model	-11.6896
1	2.6829	268.287	Dominant_Model	-8.7624
1	2.6929	269.287	Dominant_Model	-10.6211
1	2.7029	270.287	Dominant_Model	-6.5621
1	2.7129	271.287	Dominant_Model	-6.9429
1	2.7229	272.287	Dominant_Model	-4.7358
1	2.7329	273.287	Dominant_Model	-3.9219
1	2.7429	274.287	Dominant_Model	-3.9004
1	2.7529	275.287	Dominant_Model	-4.5833
1	2.7629	276.287	Dominant_Model	-7.8296
1	2.7729	277.287	Dominant_Model	-6.7254
1	2.7829	278.287	Dominant_Model	-13.1943
1	2.7929	279.287	Dominant_Model	-8.4328
1	2.8029	280.287	Dominant_Model	-8.4759
1	2.8129	281.287	Dominant_Model	-14.2553
1	2.8229	282.287	Dominant_Model	-12.1497
1	2.8329	283.287	Dominant_Model	-14.1969
1	2.8429	284.287	Dominant_Model	-14.8262
1	2.8529	285.287	Dominant_Model	-12.6474
1	2.8629	286.287	Dominant_Model	-14.2949
1	2.8729	287.287	Dominant_Model	-9.3914
1	2.8829	288.287	Dominant_Model	-7.8188
1	2.8929	289.287	Dominant_Model	-8.0283
1	2.9029	290.287	Dominant_Model	-10.0521
1	2.9129	291.287	Dominant_Model	-18.3617
1	2.9229	292.287	Dominant_Model	-20.8488
1	2.9329	293.287	Dominant_Model	-19.6643
1	2.9429	294.287	Dominant_Model	-20.9198
1	2.9529	295.287	Dominant_Model	-13.8385
1	2.9629	296.287	Dominant_Model	-11.738
1	2.9729	297.287	Dominant_Model	-20.7036
1	2.9829	298.287	Dominant_Model	-20.1434
1	2.9929	299.287	Dominant_Model	-19.8552
1	3.0029	300.287	Dominant_Model	-19.3385
1	3.0129	301.287	Dominant_Model	-20.654
1	3.0229	302.287	Dominant_Model	-20.6293
1	3.0329	303.287	Dominant_Model	-20.5137
1	3.0429	304.287	Dominant_Model	-20.6889
1	3.0529	305.287	Dominant_Model	-20.5631
1	3.0629	306.287	Dominant_Model	-20.8644
1	3.0729	307.287	Dominant_Model	-20.7446
1	3.0829	308.287	Dominant_Model	-20.9583
1	3.0929	309.287	Dominant_Model	-16.9452
1	3.1029	310.287	Dominant_Model	-19.4867
1	3.1129	311.287	Dominant_Model	-8.304
1	3.1229	312.287	Dominant_Model	-4.3238
1	3.1329	313.287	Dominant_Model	-7.8947
1	3.1429	314.287	Dominant_Model	-6.3759
1	3.1529	315.287	Dominant_Model	-6.2595
2	0.0002	0.016	Dominant_Model	-20.9897
2	0.0102	1.016	Dominant_Model	-19.6931
2	0.0202	2.016	Dominant_Model	-17.0214
2	0.0302	3.016	Dominant_Model	-12.227
2	0.0402	4.016	Dominant_Model	-13.5695
2	0.0502	5.016	Dominant_Model	-13.5328
2	0.0602	6.016	Dominant_Model	-19.4979
2	0.0702	7.016	Dominant_Model	-16.6073
2	0.0802	8.016	Dominant_Model	-20.9354
2	0.0902	9.016	Dominant_Model	-9.5815
2	0.1002	10.016	Dominant_Model	-9.1411
2	0.1102	11.016	Dominant_Model	-14.9804
2	0.1202	12.016	Dominant_Model	-6.5033
2	0.1302	13.016	Dominant_Model	-14.8958
2	0.1402	14.016	Dominant_Model	-10.2414
2	0.1502	15.016	Dominant_Model	-9.2318
2	0.1602	16.016	Dominant_Model	-11.2689
2	0.1702	17.016	Dominant_Model	-11.5075
2	0.1802	18.016	Dominant_Model	-14.3988
2	0.1902	19.016	Dominant_Model	-18.2139
2	0.2002	20.016	Dominant_Model	-20.9108
2	0.2102	21.016	Dominant_Model	-15.7963
2	0.2202	22.016	Dominant_Model	-20.2352
2	0.2302	23.016	Dominant_Model	-20.8713
2	0.2402	24.016	Dominant_Model	-18.7143
2	0.2502	25.016	Dominant_Model	-20.761
2	0.2602	26.016	Dominant_Model	-20.9021
2	0.2702	27.016	Dominant_Model	-20.0537
2	0.2802	28.016	Dominant_Model	-20.9722
2	0.2902	29.016	Dominant_Model	-17.9562
2	0.3002	30.016	Dominant_Model	-1.8645
2	0.3102	31.016	Dominant_Model	-4.9659
2	0.3202	32.016	Dominant_Model	-20.1254
2	0.3302	33.016	Dominant_Model	-20.2951
2	0.3402	34.016	Dominant_Model	-19.375
2	0.3502	35.016	Dominant_Model	-20.7578
2	0.3602	36.016	Dominant_Model	-19.8312
2	0.3702	37.016	Dominant_Model	-19.2471
2	0.3802	38.016	Dominant_Model	-20.4509
2	0.3902	39.016	Dominant_Model	-20.5342
2	0.4002	40.016	Dominant_Model	-19.7629
2	0.4102	41.016	Dominant_Model	-20.2375
2	0.4202	42.016	Dominant_Model	-20.9735
2	0.4302	43.016	Dominant_Model	-20.7729
2	0.4402	44.016	Dominant_Model	-19.9819
2	0.4502	45.016	Dominant_Model	-20.9025
2	0.4602	46.016	Dominant_Model	-19.7594
2	0.4702	47.016	Dominant_Model	-20.462
2	0.4802	48.016	Dominant_Model	-20.989
2	0.4902	49.016	Dominant_Model	-20.9691
2	0.5002	50.016	Dominant_Model	-20.9897
2	0.5102	51.016	Dominant_Model	-20.9897
2	0.5202	52.016	Dominant_Model	-20.9896
2	0.5302	53.016	Dominant_Model	-9.0127
2	0.5402	54.016	Dominant_Model	-7.5355
2	0.5502	55.016	Dominant_Model	-6.8989
2	0.5602	56.016	Dominant_Model	-6.6797
2	0.5702	57.016	Dominant_Model	-6.8062
2	0.5802	58.016	Dominant_Model	-7.3921
2	0.5902	59.016	Dominant_Model	-9.1547
2	0.6002	60.016	Dominant_Model	-9.178
2	0.6102	61.016	Dominant_Model	-6.7144
2	0.6202	62.016	Dominant_Model	-5.8049
2	0.6302	63.016	Dominant_Model	-5.4122
2	0.6402	64.016	Dominant_Model	-5.4171
2	0.6502	65.016	Dominant_Model	-6.1145
2	0.6602	66.016	Dominant_Model	-6.0501
2	0.6702	67.016	Dominant_Model	-4.6006
2	0.6802	68.016	Dominant_Model	-3.9677
2	0.6902	69.016	Dominant_Model	-3.5601
2	0.7002	70.016	Dominant_Model	-3.2631
2	0.7102	71.016	Dominant_Model	-3.0328
2	0.7202	72.016	Dominant_Model	-2.8475
2	0.7302	73.016	Dominant_Model	-2.6946
2	0.7402	74.016	Dominant_Model	-2.5663
2	0.7502	75.016	Dominant_Model	-2.4575
2	0.7602	76.016	Dominant_Model	-2.3645
2	0.7702	77.016	Dominant_Model	-2.2846
2	0.7802	78.016	Dominant_Model	-2.2159
2	0.7902	79.016	Dominant_Model	-2.1567
2	0.8002	80.016	Dominant_Model	-2.1059
2	0.8102	81.016	Dominant_Model	-2.0627
2	0.8202	82.016	Dominant_Model	-2.0262
2	0.8302	83.016	Dominant_Model	-1.9958
2	0.8402	84.016	Dominant_Model	-1.9711
2	0.8502	85.016	Dominant_Model	-1.9518
2	0.8602	86.016	Dominant_Model	-1.9375
2	0.8702	87.016	Dominant_Model	-1.928
2	0.8802	88.016	Dominant_Model	-1.9233
2	0.8902	89.016	Dominant_Model	-1.9231
2	0.9002	90.016	Dominant_Model	-1.9276
2	0.9102	91.016	Dominant_Model	-1.9366
2	0.9202	92.016	Dominant_Model	-1.9504
2	0.9302	93.016	Dominant_Model	-1.9691
2	0.9402	94.016	Dominant_Model	-1.9928
2	0.9502	95.016	Dominant_Model	-2.0218
2	0.9602	96.016	Dominant_Model	-2.0566
2	0.9702	97.016	Dominant_Model	-2.0976
2	0.9802	98.016	Dominant_Model	-2.1453
2	0.9902	99.016	Dominant_Model	-2.2005
2	1.0002	100.016	Dominant_Model	-2.2641
2	1.0102	101.016	Dominant_Model	-2.3372
2	1.0202	102.016	Dominant_Model	-2.4212
2	1.0302	103.016	Dominant_Model	-2.518
2	1.0402	104.016	Dominant_Model	-2.63
2	1.0502	105.016	Dominant_Model	-2.7603
2	1.0602	106.016	Dominant_Model	-2.9134
2	1.0702	107.016	Dominant_Model	-3.0955
2	1.0802	108.016	Dominant_Model	-3.3157
2	1.0902	109.016	Dominant_Model	-3.5887
2	1.1002	110.016	Dominant_Model	-3.9396
2	1.1102	111.016	Dominant_Model	-4.4165
2	1.1202	112.016	Dominant_Model	-5.1348
2	1.1302	113.016	Dominant_Model	-6.5154
2	1.1402	114.016	Dominant_Model	-9.4462
2	1.1502	115.016	Dominant_Model	-6.7697
2	1.1602	116.016	Dominant_Model	-6.0393
2	1.1702	117.016	Dominant_Model	-5.7497
2	1.1802	118.016	Dominant_Model	-5.7038
2	1.1902	119.016	Dominant_Model	-5.8601
2	1.2002	120.016	Dominant_Model	-6.2498
2	1.2102	121.016	Dominant_Model	-7.0179
2	1.2202	122.016	Dominant_Model	-8.8134
2	1.2302	123.016	Dominant_Model	-20.9891
2	1.2402	124.016	Dominant_Model	-18.7896
2	1.2502	125.016	Dominant_Model	-20.9372
2	1.2602	126.016	Dominant_Model	-20.9896
2	1.2702	127.016	Dominant_Model	-16.9134
2	1.2802	128.016	Dominant_Model	-19.2405
2	1.2902	129.016	Dominant_Model	-20.9897
2	1.3002	130.016	Dominant_Model	-20.7169
2	1.3102	131.016	Dominant_Model	-20.6435
2	1.3202	132.016	Dominant_Model	-19.7094
2	1.3302	133.016	Dominant_Model	-12.1073
2	1.3402	134.016	Dominant_Model	-11.1163
2	1.3502	135.016	Dominant_Model	-10.7451
2	1.3602	136.016	Dominant_Model	-10.7133
2	1.3702	137.016	Dominant_Model	-11.0075
2	1.3802	138.016	Dominant_Model	-11.7917
2	1.3902	139.016	Dominant_Model	-14.0344
2	1.4002	140.016	Dominant_Model	-20.9897
2	1.4102	141.016	Dominant_Model	-20.4729
2	1.4202	142.016	Dominant_Model	-20.2397
2	1.4302	143.016	Dominant_Model	-19.2892
2	1.4402	144.016	Dominant_Model	-20.9722
2	1.4502	145.016	Dominant_Model	-20.652
2	1.4602	146.016	Dominant_Model	-20.9867
2	1.4702	147.016	Dominant_Model	-20.9882
2	1.4802	148.016	Dominant_Model	-20.42
2	1.4902	149.016	Dominant_Model	-20.911
2	1.5002	150.016	Dominant_Model	-18.1999
2	1.5102	151.016	Dominant_Model	-20.9897
2	1.5202	152.016	Dominant_Model	-16.5962
2	1.5302	153.016	Dominant_Model	-20.0314
2	1.5402	154.016	Dominant_Model	-19.0466
2	1.5502	155.016	Dominant_Model	-20.9897
2	1.5602	156.016	Dominant_Model	-20.9889
2	1.5702	157.016	Dominant_Model	-20.9897
2	1.5802	158.016	Dominant_Model	-20.9897
2	1.5902	159.016	Dominant_Model	-9.0343
2	1.6002	160.016	Dominant_Model	-8.6689
2	1.6102	161.016	Dominant_Model	-5.567
2	1.6202	162.016	Dominant_Model	-3.9416
2	1.6302	163.016	Dominant_Model	-3.155
3	0.0007	0.073	Dominant_Model	-0.606
3	0.0107	1.073	Dominant_Model	-1.3075
3	0.0207	2.073	Dominant_Model	-7.5165
3	0.0307	3.073	Dominant_Model	-8.5776
3	0.0407	4.073	Dominant_Model	-8.4376
3	0.0507	5.073	Dominant_Model	-8.0523
3	0.0607	6.073	Dominant_Model	-16.4008
3	0.0707	7.073	Dominant_Model	-18.536
3	0.0807	8.073	Dominant_Model	-12.8861
3	0.0907	9.073	Dominant_Model	-16.0347
3	0.1007	10.073	Dominant_Model	-20.7239
3	0.1107	11.073	Dominant_Model	-19.7797
3	0.1207	12.073	Dominant_Model	-17.5778
3	0.1307	13.073	Dominant_Model	-14.207
3	0.1407	14.073	Dominant_Model	-20.8545
3	0.1507	15.073	Dominant_Model	-19.9711
3	0.1607	16.073	Dominant_Model	-12.8013
3	0.1707	17.073	Dominant_Model	-15.6353
3	0.1807	18.073	Dominant_Model	-19.4606
3	0.1907	19.073	Dominant_Model	-18.8484
3	0.2007	20.073	Dominant_Model	-20.9721
3	0.2107	21.073	Dominant_Model	-17.4381
3	0.2207	22.073	Dominant_Model	-14.1873
3	0.2307	23.073	Dominant_Model	-20.8824
3	0.2407	24.073	Dominant_Model	-20.9711
3	0.2507	25.073	Dominant_Model	-18.1042
3	0.2607	26.073	Dominant_Model	-16.566
3	0.2707	27.073	Dominant_Model	-20.8952
3	0.2807	28.073	Dominant_Model	-20.7247
3	0.2907	29.073	Dominant_Model	-20.978
3	0.3007	30.073	Dominant_Model	-20.9119
3	0.3107	31.073	Dominant_Model	-20.4618
3	0.3207	32.073	Dominant_Model	-20.1115
3	0.3307	33.073	Dominant_Model	-20.4205
3	0.3407	34.073	Dominant_Model	-20.7905
3	0.3507	35.073	Dominant_Model	-20.3047
3	0.3607	36.073	Dominant_Model	-20.6726
3	0.3707	37.073	Dominant_Model	-19.77
3	0.3807	38.073	Dominant_Model	-20.8784
3	0.3907	39.073	Dominant_Model	-18.6994
3	0.4007	40.073	Dominant_Model	-16.485
3	0.4107	41.073	Dominant_Model	-13.2803
3	0.4207	42.073	Dominant_Model	-12.7209
3	0.4307	43.073	Dominant_Model	-13.0525
3	0.4407	44.073	Dominant_Model	-15.0145
3	0.4507	45.073	Dominant_Model	-17.3134
3	0.4607	46.073	Dominant_Model	-19.081
3	0.4707	47.073	Dominant_Model	-19.1327
3	0.4807	48.073	Dominant_Model	-17.731
3	0.4907	49.073	Dominant_Model	-20.8775
3	0.5007	50.073	Dominant_Model	-15.0726
3	0.5107	51.073	Dominant_Model	-20.9089
3	0.5207	52.073	Dominant_Model	-20.1309
3	0.5307	53.073	Dominant_Model	-20.4558
3	0.5407	54.073	Dominant_Model	-19.8489
3	0.5507	55.073	Dominant_Model	-16.76
3	0.5607	56.073	Dominant_Model	-20.9869
3	0.5707	57.073	Dominant_Model	-20.8956
3	0.5807	58.073	Dominant_Model	-20.8178
3	0.5907	59.073	Dominant_Model	-17.5018
3	0.6007	60.073	Dominant_Model	-20.9117
3	0.6107	61.073	Dominant_Model	-16.9043
3	0.6207	62.073	Dominant_Model	-19.8649
3	0.6307	63.073	Dominant_Model	-19.9777
3	0.6407	64.073	Dominant_Model	-20.7354
3	0.6507	65.073	Dominant_Model	-19.4343
3	0.6607	66.073	Dominant_Model	-20.9828
3	0.6707	67.073	Dominant_Model	-20.9683
3	0.6807	68.073	Dominant_Model	-19.1024
3	0.6907	69.073	Dominant_Model	-15.7296
3	0.7007	70.073	Dominant_Model	-14.6785
3	0.7107	71.073	Dominant_Model	-17.4354
3	0.7207	72.073	Dominant_Model	-15.3842
3	0.7307	73.073	Dominant_Model	-16.926
3	0.7407	74.073	Dominant_Model	-18.7835
3	0.7507	75.073	Dominant_Model	-20.8475
3	0.7607	76.073	Dominant_Model	-20.8893
3	0.7707	77.073	Dominant_Model	-15.3918
3	0.7807	78.073	Dominant_Model	-15.5219
3	0.7907	79.073	Dominant_Model	-16.3109
3	0.8007	80.073	Dominant_Model	-18.1649
3	0.8107	81.073	Dominant_Model	-19.0713
3	0.8207	82.073	Dominant_Model	-18.7658
3	0.8307	83.073	Dominant_Model	-16.0875
3	0.8407	84.073	Dominant_Model	-15.7785
3	0.8507	85.073	Dominant_Model	-13.8571
3	0.8607	86.073	Dominant_Model	-17.9213
3	0.8707	87.073	Dominant_Model	-12.1701
3	0.8807	88.073	Dominant_Model	-11.6847
3	0.8907	89.073	Dominant_Model	-13.7707
3	0.9007	90.073	Dominant_Model	-17.1404
3	0.9107	91.073	Dominant_Model	-18.7368
3	0.9207	92.073	Dominant_Model	-4.916
3	0.9307	93.073	Dominant_Model	-15.1361
3	0.9407	94.073	Dominant_Model	-15.9453
3	0.9507	95.073	Dominant_Model	-15.7994
3	0.9607	96.073	Dominant_Model	-15.4262
3	0.9707	97.073	Dominant_Model	-17.0583
3	0.9807	98.073	Dominant_Model	-14.1799
3	0.9907	99.073	Dominant_Model	-13.6371
3	1.0007	100.073	Dominant_Model	-20.8366
3	1.0107	101.073	Dominant_Model	-19.2234
3	1.0207	102.073	Dominant_Model	-20.7797
3	1.0307	103.073	Dominant_Model	-18.529
3	1.0407	104.073	Dominant_Model	-20.6765
3	1.0507	105.073	Dominant_Model	-19.4825
3	1.0607	106.073	Dominant_Model	-15.9643
3	1.0707	107.073	Dominant_Model	-14.4588
3	1.0807	108.073	Dominant_Model	-18.2971
3	1.0907	109.073	Dominant_Model	-19.8148
3	1.1007	110.073	Dominant_Model	-20.5821
3	1.1107	111.073	Dominant_Model	-16.9453
3	1.1207	112.073	Dominant_Model	-20.2948
3	1.1307	113.073	Dominant_Model	-20.8103
3	1.1407	114.073	Dominant_Model	-14.6272
3	1.1507	115.073	Dominant_Model	-11.5607
3	1.1607	116.073	Dominant_Model	-10.85
3	1.1707	117.073	Dominant_Model	-15.5159
3	1.1807	118.073	Dominant_Model	-12.7609
3	1.1907	119.073	Dominant_Model	-15.4426
3	1.2007	120.073	Dominant_Model	-13.6381
3	1.2107	121.073	Dominant_Model	-10.9508
3	1.2207	122.073	Dominant_Model	-13.5389
3	1.2307	123.073	Dominant_Model	-12.7519
3	1.2407	124.073	Dominant_Model	-13.6398
3	1.2507	125.073	Dominant_Model	-13.5164
3	1.2607	126.073	Dominant_Model	-14.056
3	1.2707	127.073	Dominant_Model	-14.0006
3	1.2807	128.073	Dominant_Model	-12.7511
3	1.2907	129.073	Dominant_Model	-13.171
3	1.3007	130.073	Dominant_Model	-11.6234
3	1.3107	131.073	Dominant_Model	-13.4743
3	1.3207	132.073	Dominant_Model	-13.4692
3	1.3307	133.073	Dominant_Model	-10.9586
3	1.3407	134.073	Dominant_Model	-12.4315
3	1.3507	135.073	Dominant_Model	-15.8947
3	1.3607	136.073	Dominant_Model	-12.6052
3	1.3707	137.073	Dominant_Model	-10.0372
3	1.3807	138.073	Dominant_Model	-9.7278
3	1.3907	139.073	Dominant_Model	-20.6862
3	1.4007	140.073	Dominant_Model	-17.9411
3	1.4107	141.073	Dominant_Model	-20.9623
3	1.4207	142.073	Dominant_Model	-16.3672
3	1.4307	143.073	Dominant_Model	-3.5774
3	1.4407	144.073	Dominant_Model	1.9406
3	1.4507	145.073	Dominant_Model	0.7003
4	0.001	0.095	Dominant_Model	-8.7602
4	0.011	1.095	Dominant_Model	-15.9703
4	0.021	2.095	Dominant_Model	-13.7884
4	0.031	3.095	Dominant_Model	-13.9284
4	0.041	4.095	Dominant_Model	-20.9805
4	0.051	5.095	Dominant_Model	-20.6406
4	0.061	6.095	Dominant_Model	-17.1146
4	0.071	7.095	Dominant_Model	-13.326
4	0.081	8.095	Dominant_Model	-14.1247
4	0.091	9.095	Dominant_Model	-18.8386
4	0.101	10.095	Dominant_Model	-19.595
4	0.111	11.095	Dominant_Model	-16.9952
4	0.121	12.095	Dominant_Model	-20.9897
4	0.131	13.095	Dominant_Model	-10.0229
4	0.141	14.095	Dominant_Model	-5.7979
4	0.151	15.095	Dominant_Model	-4.9286
4	0.161	16.095	Dominant_Model	-6.0325
4	0.171	17.095	Dominant_Model	-5.4298
4	0.181	18.095	Dominant_Model	-2.1924
4	0.191	19.095	Dominant_Model	-1.8333
4	0.201	20.095	Dominant_Model	-1.8117
4	0.211	21.095	Dominant_Model	-2.0164
4	0.221	22.095	Dominant_Model	-2.4693
4	0.231	23.095	Dominant_Model	-3.3303
4	0.241	24.095	Dominant_Model	-5.3994
4	0.251	25.095	Dominant_Model	-20.2614
4	0.261	26.095	Dominant_Model	-20.9853
4	0.271	27.095	Dominant_Model	-19.9724
4	0.281	28.095	Dominant_Model	-20.9567
4	0.291	29.095	Dominant_Model	-20.09
4	0.301	30.095	Dominant_Model	-20.1395
4	0.311	31.095	Dominant_Model	-16.9142
4	0.321	32.095	Dominant_Model	-19.5196
4	0.331	33.095	Dominant_Model	-20.1677
4	0.341	34.095	Dominant_Model	-20.9565
4	0.351	35.095	Dominant_Model	-18.5103
4	0.361	36.095	Dominant_Model	-18.0069
4	0.371	37.095	Dominant_Model	-19.4001
4	0.381	38.095	Dominant_Model	-17.6174
4	0.391	39.095	Dominant_Model	-8.513
4	0.401	40.095	Dominant_Model	-19.2592
4	0.411	41.095	Dominant_Model	-16.5141
4	0.421	42.095	Dominant_Model	-10.3419
4	0.431	43.095	Dominant_Model	-7.5168
4	0.441	44.095	Dominant_Model	-6.5865
4	0.451	45.095	Dominant_Model	-6.0494
4	0.461	46.095	Dominant_Model	-5.6926
4	0.471	47.095	Dominant_Model	-5.4415
4	0.481	48.095	Dominant_Model	-5.2618
4	0.491	49.095	Dominant_Model	-5.1351
4	0.501	50.095	Dominant_Model	-5.0511
4	0.511	51.095	Dominant_Model	-5.004
4	0.521	52.095	Dominant_Model	-4.9905
4	0.531	53.095	Dominant_Model	-5.01
4	0.541	54.095	Dominant_Model	-5.0636
4	0.551	55.095	Dominant_Model	-5.155
4	0.561	56.095	Dominant_Model	-5.2908
4	0.571	57.095	Dominant_Model	-5.4826
4	0.581	58.095	Dominant_Model	-5.7514
4	0.591	59.095	Dominant_Model	-6.1376
4	0.601	60.095	Dominant_Model	-6.7344
4	0.611	61.095	Dominant_Model	-7.9785
4	0.621	62.095	Dominant_Model	-19.7121
4	0.631	63.095	Dominant_Model	-20.0827
4	0.641	64.095	Dominant_Model	-16.3715
4	0.651	65.095	Dominant_Model	-20.4882
4	0.661	66.095	Dominant_Model	-18.5802
4	0.671	67.095	Dominant_Model	-16.6981
4	0.681	68.095	Dominant_Model	-17.3908
4	0.691	69.095	Dominant_Model	-20.0467
4	0.701	70.095	Dominant_Model	-19.6495
4	0.711	71.095	Dominant_Model	-20.8911
4	0.721	72.095	Dominant_Model	-19.6089
4	0.731	73.095	Dominant_Model	-14.6711
4	0.741	74.095	Dominant_Model	-20.9643
4	0.751	75.095	Dominant_Model	-13.8812
4	0.761	76.095	Dominant_Model	-13.0755
4	0.771	77.095	Dominant_Model	-20.9028
4	0.781	78.095	Dominant_Model	-19.3577
4	0.791	79.095	Dominant_Model	-20.8781
4	0.801	80.095	Dominant_Model	-19.9304
4	0.811	81.095	Dominant_Model	-20.7391
4	0.821	82.095	Dominant_Model	-20.9568
4	0.831	83.095	Dominant_Model	-20.6761
4	0.841	84.095	Dominant_Model	-20.0363
4	0.851	85.095	Dominant_Model	-20.6686
4	0.861	86.095	Dominant_Model	-20.2073
4	0.871	87.095	Dominant_Model	-20.1075
4	0.881	88.095	Dominant_Model	-20.5402
4	0.891	89.095	Dominant_Model	-20.1951
4	0.901	90.095	Dominant_Model	-20.6365
4	0.911	91.095	Dominant_Model	-15.6197
4	0.921	92.095	Dominant_Model	-15.4557
4	0.931	93.095	Dominant_Model	-16.1968
4	0.941	94.095	Dominant_Model	-14.9897
4	0.951	95.095	Dominant_Model	-14.9897
4	0.961	96.095	Dominant_Model	-14.9897
4	0.971	97.095	Dominant_Model	-14.9897
4	0.981	98.095	Dominant_Model	-14.9897
4	0.991	99.095	Dominant_Model	-14.989
4	1.001	100.095	Dominant_Model	-14.9823
4	1.011	101.095	Dominant_Model	-14.9781
4	1.021	102.095	Dominant_Model	-14.9897
4	1.031	103.095	Dominant_Model	-14.9897
4	1.041	104.095	Dominant_Model	-10.8688
4	1.051	105.095	Dominant_Model	-9.7907
4	1.061	106.095	Dominant_Model	-9.7651
4	1.071	107.095	Dominant_Model	-10.7305
4	1.081	108.095	Dominant_Model	-14.9897
4	1.091	109.095	Dominant_Model	-14.9897
4	1.101	110.095	Dominant_Model	-14.9896
4	1.111	111.095	Dominant_Model	-14.989
4	1.121	112.095	Dominant_Model	-14.9897
4	1.131	113.095	Dominant_Model	-14.9897
4	1.141	114.095	Dominant_Model	-14.9897
4	1.151	115.095	Dominant_Model	-14.9897
4	1.161	116.095	Dominant_Model	-14.9896
4	1.171	117.095	Dominant_Model	-14.9543
4	1.181	118.095	Dominant_Model	-14.9836
4	1.191	119.095	Dominant_Model	-14.9897
4	1.201	120.095	Dominant_Model	-14.9784
4	1.211	121.095	Dominant_Model	-14.9798
4	1.221	122.095	Dominant_Model	-14.9897
4	1.231	123.095	Dominant_Model	-14.9897
4	1.241	124.095	Dominant_Model	-14.9897
4	1.251	125.095	Dominant_Model	-14.9787
4	1.261	126.095	Dominant_Model	-14.9897
4	1.271	127.095	Dominant_Model	-14.9897
4	1.281	128.095	Dominant_Model	-14.9897
4	1.291	129.095	Dominant_Model	-14.9894
4	1.301	130.095	Dominant_Model	-14.9897
4	1.311	131.095	Dominant_Model	-14.9892
4	1.321	132.095	Dominant_Model	-14.9897
4	1.331	133.095	Dominant_Model	-20.8721
4	1.341	134.095	Dominant_Model	-20.9474
4	1.351	135.095	Dominant_Model	-20.5065
4	1.361	136.095	Dominant_Model	-20.4692
4	1.371	137.095	Dominant_Model	-13.7292
4	1.381	138.095	Dominant_Model	-20.9661
4	1.391	139.095	Dominant_Model	-20.6282
4	1.401	140.095	Dominant_Model	-19.2453
4	1.411	141.095	Dominant_Model	-20.3004
4	1.421	142.095	Dominant_Model	-19.1681
4	1.431	143.095	Dominant_Model	-19.5271
4	1.441	144.095	Dominant_Model	-5.7831
5	0.0014	0.144	Dominant_Model	-2.6997
5	0.0114	1.144	Dominant_Model	-2.8729
5	0.0214	2.144	Dominant_Model	-2.6349
5	0.0314	3.144	Dominant_Model	-2.1364
5	0.0414	4.144	Dominant_Model	-4.2167
5	0.0514	5.144	Dominant_Model	-3.0586
5	0.0614	6.144	Dominant_Model	2.5822
5	0.0714	7.144	Dominant_Model	3.0103
5	0.0814	8.144	Dominant_Model	3.0103
5	0.0914	9.144	Dominant_Model	3.0103
5	0.1014	10.144	Dominant_Model	3.0102
5	0.1114	11.144	Dominant_Model	3.0103
5	0.1214	12.144	Dominant_Model	3.0103
5	0.1314	13.144	Dominant_Model	3.0103
5	0.1414	14.144	Dominant_Model	3.0103
5	0.1514	15.144	Dominant_Model	3.0103
5	0.1614	16.144	Dominant_Model	3.0103
5	0.1714	17.144	Dominant_Model	3.0102
5	0.1814	18.144	Dominant_Model	3.0103
5	0.1914	19.144	Dominant_Model	3.0103
5	0.2014	20.144	Dominant_Model	3.0103
5	0.2114	21.144	Dominant_Model	3.0101
5	0.2214	22.144	Dominant_Model	3.01
5	0.2314	23.144	Dominant_Model	3.0103
5	0.2414	24.144	Dominant_Model	3.0101
5	0.2514	25.144	Dominant_Model	3.0103
5	0.2614	26.144	Dominant_Model	3.0103
5	0.2714	27.144	Dominant_Model	3.0103
5	0.2814	28.144	Dominant_Model	3.0103
5	0.2914	29.144	Dominant_Model	3.0101
5	0.3014	30.144	Dominant_Model	3.0103
5	0.3114	31.144	Dominant_Model	3.0102
5	0.3214	32.144	Dominant_Model	3.0103
5	0.3314	33.144	Dominant_Model	3.0103
5	0.3414	34.144	Dominant_Model	3.0103
5	0.3514	35.144	Dominant_Model	3.0102
5	0.3614	36.144	Dominant_Model	3.01
5	0.3714	37.144	Dominant_Model	3.0103
5	0.3814	38.144	Dominant_Model	3.0103
5	0.3914	39.144	Dominant_Model	3.0101
5	0.4014	40.144	Dominant_Model	3.0093
5	0.4114	41.144	Dominant_Model	3.0096
5	0.4214	42.144	Dominant_Model	3.0102
5	0.4314	43.144	Dominant_Model	3.0101
5	0.4414	44.144	Dominant_Model	3.0102
5	0.4514	45.144	Dominant_Model	3.0103
5	0.4614	46.144	Dominant_Model	3.0102
5	0.4714	47.144	Dominant_Model	3.0102
5	0.4814	48.144	Dominant_Model	3.0098
5	0.4914	49.144	Dominant_Model	3.01
5	0.5014	50.144	Dominant_Model	3.0103
5	0.5114	51.144	Dominant_Model	3.0103
5	0.5214	52.144	Dominant_Model	3.0102
5	0.5314	53.144	Dominant_Model	3.0096
5	0.5414	54.144	Dominant_Model	3.0095
5	0.5514	55.144	Dominant_Model	3.0101
5	0.5614	56.144	Dominant_Model	3.0094
5	0.5714	57.144	Dominant_Model	3.0098
5	0.5814	58.144	Dominant_Model	3.0103
5	0.5914	59.144	Dominant_Model	3.0103
5	0.6014	60.144	Dominant_Model	3.0103
5	0.6114	61.144	Dominant_Model	3.0103
5	0.6214	62.144	Dominant_Model	3.0103
5	0.6314	63.144	Dominant_Model	3.0103
5	0.6414	64.144	Dominant_Model	3.0103
5	0.6514	65.144	Dominant_Model	3.0103
5	0.6614	66.144	Dominant_Model	3.0103
5	0.6714	67.144	Dominant_Model	3.0103
5	0.6814	68.144	Dominant_Model	3.0103
5	0.6914	69.144	Dominant_Model	3.0103
5	0.7014	70.144	Dominant_Model	2.9898
5	0.7114	71.144	Dominant_Model	2.9352
5	0.7214	72.144	Dominant_Model	2.8749
5	0.7314	73.144	Dominant_Model	2.8069
5	0.7414	74.144	Dominant_Model	2.728
5	0.7514	75.144	Dominant_Model	2.633
5	0.7614	76.144	Dominant_Model	2.5123
5	0.7714	77.144	Dominant_Model	2.3445
5	0.7814	78.144	Dominant_Model	2.0648
5	0.7914	79.144	Dominant_Model	0.9833
5	0.8014	80.144	Dominant_Model	2.3781
5	0.8114	81.144	Dominant_Model	-1.3616
5	0.8214	82.144	Dominant_Model	-0.823
5	0.8314	83.144	Dominant_Model	-1.2771
5	0.8414	84.144	Dominant_Model	-3.509
5	0.8514	85.144	Dominant_Model	2.6127
5	0.8614	86.144	Dominant_Model	-1.8864
5	0.8714	87.144	Dominant_Model	-2.0038
5	0.8814	88.144	Dominant_Model	-1.7987
5	0.8914	89.144	Dominant_Model	-3.5286
5	0.9014	90.144	Dominant_Model	-2.0218
5	0.9114	91.144	Dominant_Model	-2.999
5	0.9214	92.144	Dominant_Model	1.5258
5	0.9314	93.144	Dominant_Model	1.1224
5	0.9414	94.144	Dominant_Model	-0.2175
5	0.9514	95.144	Dominant_Model	-5.0772
5	0.9614	96.144	Dominant_Model	1.0508
5	0.9714	97.144	Dominant_Model	-3.0376
5	0.9814	98.144	Dominant_Model	-8.7708
5	0.9914	99.144	Dominant_Model	-7.2713
5	1.0014	100.144	Dominant_Model	-9.436
5	1.0114	101.144	Dominant_Model	-5.2201
5	1.0214	102.144	Dominant_Model	-6.5974
5	1.0314	103.144	Dominant_Model	-14.2347
5	1.0414	104.144	Dominant_Model	-14.4209
5	1.0514	105.144	Dominant_Model	-14.771
5	1.0614	106.144	Dominant_Model	-14.1729
5	1.0714	107.144	Dominant_Model	-20.9897
5	1.0814	108.144	Dominant_Model	-20.9897
5	1.0914	109.144	Dominant_Model	-20.9897
5	1.1014	110.144	Dominant_Model	2.8945
5	1.1114	111.144	Dominant_Model	-2.3621
5	1.1214	112.144	Dominant_Model	-0.8878
6	0.0001	0.013	Dominant_Model	-1.5515
6	0.0101	1.013	Dominant_Model	-1.9462
6	0.0201	2.013	Dominant_Model	-2.577
6	0.0301	3.013	Dominant_Model	-4.0412
6	0.0401	4.013	Dominant_Model	-13.518
6	0.0501	5.013	Dominant_Model	-13.9047
6	0.0601	6.013	Dominant_Model	-20.6375
6	0.0701	7.013	Dominant_Model	-20.9883
6	0.0801	8.013	Dominant_Model	-20.6271
6	0.0901	9.013	Dominant_Model	-20.2945
6	0.1001	10.013	Dominant_Model	-20.9854
6	0.1101	11.013	Dominant_Model	-20.9863
6	0.1201	12.013	Dominant_Model	-20.9897
6	0.1301	13.013	Dominant_Model	-20.9874
6	0.1401	14.013	Dominant_Model	-20.9897
6	0.1501	15.013	Dominant_Model	-20.9897
6	0.1601	16.013	Dominant_Model	-20.9879
6	0.1701	17.013	Dominant_Model	-20.9892
6	0.1801	18.013	Dominant_Model	-20.9897
6	0.1901	19.013	Dominant_Model	-20.9877
6	0.2001	20.013	Dominant_Model	-20.9897
6	0.2101	21.013	Dominant_Model	-20.9868
6	0.2201	22.013	Dominant_Model	-20.8392
6	0.2301	23.013	Dominant_Model	-18.2023
6	0.2401	24.013	Dominant_Model	-20.9863
6	0.2501	25.013	Dominant_Model	-20.159
6	0.2601	26.013	Dominant_Model	-19.2795
6	0.2701	27.013	Dominant_Model	-17.4982
6	0.2801	28.013	Dominant_Model	-19.9975
6	0.2901	29.013	Dominant_Model	-16.6443
6	0.3001	30.013	Dominant_Model	-19.3584
6	0.3101	31.013	Dominant_Model	-18.9293
6	0.3201	32.013	Dominant_Model	-16.1784
6	0.3301	33.013	Dominant_Model	-18.5149
6	0.3401	34.013	Dominant_Model	-18.3534
6	0.3501	35.013	Dominant_Model	-20.551
6	0.3601	36.013	Dominant_Model	-15.2174
6	0.3701	37.013	Dominant_Model	-18.0615
6	0.3801	38.013	Dominant_Model	-19.4406
6	0.3901	39.013	Dominant_Model	-16.6816
6	0.4001	40.013	Dominant_Model	-20.9656
6	0.4101	41.013	Dominant_Model	-19.7928
6	0.4201	42.013	Dominant_Model	-16.8841
6	0.4301	43.013	Dominant_Model	-19.4839
6	0.4401	44.013	Dominant_Model	-15.7397
6	0.4501	45.013	Dominant_Model	-20.3412
6	0.4601	46.013	Dominant_Model	-19.9331
6	0.4701	47.013	Dominant_Model	-19.4306
6	0.4801	48.013	Dominant_Model	-13.3486
6	0.4901	49.013	Dominant_Model	-12.6369
6	0.5001	50.013	Dominant_Model	-12.7369
6	0.5101	51.013	Dominant_Model	-13.8069
6	0.5201	52.013	Dominant_Model	-18.9908
6	0.5301	53.013	Dominant_Model	-20.9283
6	0.5401	54.013	Dominant_Model	-14.2144
6	0.5501	55.013	Dominant_Model	-14.4244
6	0.5601	56.013	Dominant_Model	-19.3026
6	0.5701	57.013	Dominant_Model	-14.499
6	0.5801	58.013	Dominant_Model	-13.2126
6	0.5901	59.013	Dominant_Model	-13.2031
6	0.6001	60.013	Dominant_Model	-14.4401
6	0.6101	61.013	Dominant_Model	-18.6267
6	0.6201	62.013	Dominant_Model	-17.5784
6	0.6301	63.013	Dominant_Model	-20.6005
6	0.6401	64.013	Dominant_Model	-20.0153
6	0.6501	65.013	Dominant_Model	-18.5669
6	0.6601	66.013	Dominant_Model	-18.1975
6	0.6701	67.013	Dominant_Model	-17.5402
6	0.6801	68.013	Dominant_Model	-20.8632
6	0.6901	69.013	Dominant_Model	-20.9894
6	0.7001	70.013	Dominant_Model	-20.3319
6	0.7101	71.013	Dominant_Model	-20.989
6	0.7201	72.013	Dominant_Model	-20.953
6	0.7301	73.013	Dominant_Model	-19.4615
6	0.7401	74.013	Dominant_Model	-20.9515
6	0.7501	75.013	Dominant_Model	-20.5014
6	0.7601	76.013	Dominant_Model	-20.7323
6	0.7701	77.013	Dominant_Model	-19.9627
6	0.7801	78.013	Dominant_Model	-20.6836
6	0.7901	79.013	Dominant_Model	-20.0593
6	0.8001	80.013	Dominant_Model	-20.9258
6	0.8101	81.013	Dominant_Model	-20.6235
6	0.8201	82.013	Dominant_Model	-19.631
6	0.8301	83.013	Dominant_Model	-20.5928
6	0.8401	84.013	Dominant_Model	-20.4594
6	0.8501	85.013	Dominant_Model	-18.2521
6	0.8601	86.013	Dominant_Model	-20.8306
6	0.8701	87.013	Dominant_Model	-19.7676
6	0.8801	88.013	Dominant_Model	-20.1539
6	0.8901	89.013	Dominant_Model	-19.5141
6	0.9001	90.013	Dominant_Model	-16.8159
6	0.9101	91.013	Dominant_Model	-20.8162
6	0.9201	92.013	Dominant_Model	-20.4953
6	0.9301	93.013	Dominant_Model	-18.3768
6	0.9401	94.013	Dominant_Model	-20.3879
6	0.9501	95.013	Dominant_Model	-19.5229
6	0.9601	96.013	Dominant_Model	-20.3601
6	0.9701	97.013	Dominant_Model	-17.3263
6	0.9801	98.013	Dominant_Model	-16.9766
6	0.9901	99.013	Dominant_Model	-20.1903
6	1.0001	100.013	Dominant_Model	-20.3264
6	1.0101	101.013	Dominant_Model	-20.5112
6	1.0201	102.013	Dominant_Model	-19.8951
6	1.0301	103.013	Dominant_Model	-20.829
6	1.0401	104.013	Dominant_Model	-18.5938
6	1.0501	105.013	Dominant_Model	-20.682
6	1.0601	106.013	Dominant_Model	-18.3323
6	1.0701	107.013	Dominant_Model	-19.6871
6	1.0801	108.013	Dominant_Model	-18.9143
6	1.0901	109.013	Dominant_Model	-19.6259
6	1.1001	110.013	Dominant_Model	-20.3432
6	1.1101	111.013	Dominant_Model	-20.9663
6	1.1201	112.013	Dominant_Model	-20.6161
6	1.1301	113.013	Dominant_Model	-20.9321
6	1.1401	114.013	Dominant_Model	-20.9658
6	1.1501	115.013	Dominant_Model	-18.1217
6	1.1601	116.013	Dominant_Model	-20.3561
6	1.1701	117.013	Dominant_Model	-19.0809
6	1.1801	118.013	Dominant_Model	-20.9097
6	1.1901	119.013	Dominant_Model	-12.9669
6	1.2001	120.013	Dominant_Model	-20.0393
6	1.2101	121.013	Dominant_Model	-18.339
6	1.2201	122.013	Dominant_Model	-20.325
6	1.2301	123.013	Dominant_Model	-20.1842
6	1.2401	124.013	Dominant_Model	-20.2109
6	1.2501	125.013	Dominant_Model	-19.7289
6	1.2601	126.013	Dominant_Model	-20.9766
6	1.2701	127.013	Dominant_Model	-20.9838
6	1.2801	128.013	Dominant_Model	-18.1843
6	1.2901	129.013	Dominant_Model	-20.5541
6	1.3001	130.013	Dominant_Model	-19.9783
6	1.3101	131.013	Dominant_Model	-18.7719
6	1.3201	132.013	Dominant_Model	-20.7023
6	1.3301	133.013	Dominant_Model	-19.9979
6	1.3401	134.013	Dominant_Model	-19.9806
6	1.3501	135.013	Dominant_Model	-20.9038
6	1.3601	136.013	Dominant_Model	-19.5701
6	1.3701	137.013	Dominant_Model	-20.8031
6	1.3801	138.013	Dominant_Model	-16.9106
6	1.3901	139.013	Dominant_Model	-20.6686
6	1.4001	140.013	Dominant_Model	-17.0641
6	1.4101	141.013	Dominant_Model	-18.3314
6	1.4201	142.013	Dominant_Model	-18.2544
6	1.4301	143.013	Dominant_Model	-20.7079
6	1.4401	144.013	Dominant_Model	-20.5903
6	1.4501	145.013	Dominant_Model	-20.8054
6	1.4601	146.013	Dominant_Model	-20.3281
6	1.4701	147.013	Dominant_Model	-19.6888
6	1.4801	148.013	Dominant_Model	-20.5726
6	1.4901	149.013	Dominant_Model	-19.7001
6	1.5001	150.013	Dominant_Model	-18.6476
6	1.5101	151.013	Dominant_Model	-18.1828
6	1.5201	152.013	Dominant_Model	-17.7364
6	1.5301	153.013	Dominant_Model	-20.5818
6	1.5401	154.013	Dominant_Model	-20.4383
6	1.5501	155.013	Dominant_Model	-20.2294
6	1.5601	156.013	Dominant_Model	-19.5888
6	1.5701	157.013	Dominant_Model	-20.7016
6	1.5801	158.013	Dominant_Model	-7.346
7	0.0005	0.049	Dominant_Model	-7.1333
7	0.0105	1.049	Dominant_Model	-19.5946
7	0.0205	2.049	Dominant_Model	-19.0887
7	0.0305	3.049	Dominant_Model	-18.9636
7	0.0405	4.049	Dominant_Model	-12.8362
7	0.0505	5.049	Dominant_Model	-18.9784
7	0.0605	6.049	Dominant_Model	-20.6719
7	0.0705	7.049	Dominant_Model	-19.8718
7	0.0805	8.049	Dominant_Model	-15.6627
7	0.0905	9.049	Dominant_Model	-18.6746
7	0.1005	10.049	Dominant_Model	-20.4533
7	0.1105	11.049	Dominant_Model	-20.5664
7	0.1205	12.049	Dominant_Model	-17.0479
7	0.1305	13.049	Dominant_Model	-17.1019
7	0.1405	14.049	Dominant_Model	-16.1806
7	0.1505	15.049	Dominant_Model	-20.0384
7	0.1605	16.049	Dominant_Model	-18.904
7	0.1705	17.049	Dominant_Model	-20.6883
7	0.1805	18.049	Dominant_Model	-20.6468
7	0.1905	19.049	Dominant_Model	-15.3372
7	0.2005	20.049	Dominant_Model	-12.3479
7	0.2105	21.049	Dominant_Model	-15.127
7	0.2205	22.049	Dominant_Model	-15.3184
7	0.2305	23.049	Dominant_Model	-16.6641
7	0.2405	24.049	Dominant_Model	-16.2666
7	0.2505	25.049	Dominant_Model	-8.9796
7	0.2605	26.049	Dominant_Model	-8.4876
7	0.2705	27.049	Dominant_Model	-16.6809
7	0.2805	28.049	Dominant_Model	-15.4047
7	0.2905	29.049	Dominant_Model	-17.9646
7	0.3005	30.049	Dominant_Model	-16.615
7	0.3105	31.049	Dominant_Model	-15.9201
7	0.3205	32.049	Dominant_Model	-14.6402
7	0.3305	33.049	Dominant_Model	-11.3983
7	0.3405	34.049	Dominant_Model	-19.4832
7	0.3505	35.049	Dominant_Model	-12.3123
7	0.3605	36.049	Dominant_Model	-13.9063
7	0.3705	37.049	Dominant_Model	-11.2591
7	0.3805	38.049	Dominant_Model	-16.2584
7	0.3905	39.049	Dominant_Model	-15.258
7	0.4005	40.049	Dominant_Model	-12.7014
7	0.4105	41.049	Dominant_Model	-15.7763
7	0.4205	42.049	Dominant_Model	-11.4116
7	0.4305	43.049	Dominant_Model	-16.2619
7	0.4405	44.049	Dominant_Model	-16.3146
7	0.4505	45.049	Dominant_Model	-15.1365
7	0.4605	46.049	Dominant_Model	-10.3874
7	0.4705	47.049	Dominant_Model	-17.9533
7	0.4805	48.049	Dominant_Model	-12.6149
7	0.4905	49.049	Dominant_Model	-14.4436
7	0.5005	50.049	Dominant_Model	-16.9716
7	0.5105	51.049	Dominant_Model	-11.7228
7	0.5205	52.049	Dominant_Model	-16.8441
7	0.5305	53.049	Dominant_Model	-13.3939
7	0.5405	54.049	Dominant_Model	-14.219
7	0.5505	55.049	Dominant_Model	-14.2567
7	0.5605	56.049	Dominant_Model	-15.4795
7	0.5705	57.049	Dominant_Model	-13.4868
7	0.5805	58.049	Dominant_Model	-15.1394
7	0.5905	59.049	Dominant_Model	-17.7116
7	0.6005	60.049	Dominant_Model	-14.3958
7	0.6105	61.049	Dominant_Model	-11.9825
7	0.6205	62.049	Dominant_Model	-14.6131
7	0.6305	63.049	Dominant_Model	-10.6978
7	0.6405	64.049	Dominant_Model	-12.8269
7	0.6505	65.049	Dominant_Model	-19.7586
7	0.6605	66.049	Dominant_Model	-13.1733
7	0.6705	67.049	Dominant_Model	-18.8716
7	0.6805	68.049	Dominant_Model	-15.9272
7	0.6905	69.049	Dominant_Model	-17.1176
7	0.7005	70.049	Dominant_Model	-19.0216
7	0.7105	71.049	Dominant_Model	-20.5891
7	0.7205	72.049	Dominant_Model	-20.6202
7	0.7305	73.049	Dominant_Model	-20.6885
7	0.7405	74.049	Dominant_Model	-20.6834
7	0.7505	75.049	Dominant_Model	-20.6882
7	0.7605	76.049	Dominant_Model	-19.949
7	0.7705	77.049	Dominant_Model	-20.2829
7	0.7805	78.049	Dominant_Model	-20.6765
7	0.7905	79.049	Dominant_Model	-20.6794
7	0.8005	80.049	Dominant_Model	-18.9693
7	0.8105	81.049	Dominant_Model	-17.5502
7	0.8205	82.049	Dominant_Model	-20.6699
7	0.8305	83.049	Dominant_Model	-18.8779
7	0.8405	84.049	Dominant_Model	-16.1505
7	0.8505	85.049	Dominant_Model	-13.62
7	0.8605	86.049	Dominant_Model	-16.6494
7	0.8705	87.049	Dominant_Model	-16.3619
7	0.8805	88.049	Dominant_Model	-20.5769
7	0.8905	89.049	Dominant_Model	-20.6869
7	0.9005	90.049	Dominant_Model	-20.6619
7	0.9105	91.049	Dominant_Model	-20.6628
7	0.9205	92.049	Dominant_Model	-19.8093
7	0.9305	93.049	Dominant_Model	-20.4982
7	0.9405	94.049	Dominant_Model	-16.7146
7	0.9505	95.049	Dominant_Model	-20.6868
7	0.9605	96.049	Dominant_Model	-20.6507
7	0.9705	97.049	Dominant_Model	-20.0452
7	0.9805	98.049	Dominant_Model	-20.6552
7	0.9905	99.049	Dominant_Model	-20.6709
7	1.0005	100.049	Dominant_Model	-20.6369
7	1.0105	101.049	Dominant_Model	-14.8244
7	1.0205	102.049	Dominant_Model	-19.9103
7	1.0305	103.049	Dominant_Model	-20.1209
7	1.0405	104.049	Dominant_Model	-20.6598
7	1.0505	105.049	Dominant_Model	-20.5814
7	1.0605	106.049	Dominant_Model	-20.6661
7	1.0705	107.049	Dominant_Model	-13.1131
7	1.0805	108.049	Dominant_Model	-13.2033
7	1.0905	109.049	Dominant_Model	-20.6836
7	1.1005	110.049	Dominant_Model	-15.3812
7	1.1105	111.049	Dominant_Model	-20.4229
7	1.1205	112.049	Dominant_Model	-19.3235
7	1.1305	113.049	Dominant_Model	-20.6802
7	1.1405	114.049	Dominant_Model	-19.8553
7	1.1505	115.049	Dominant_Model	-19.3717
7	1.1605	116.049	Dominant_Model	-20.6219
7	1.1705	117.049	Dominant_Model	-17.0493
7	1.1805	118.049	Dominant_Model	-20.3919
7	1.1905	119.049	Dominant_Model	-20.013
7	1.2005	120.049	Dominant_Model	-15.4762
7	1.2105	121.049	Dominant_Model	-19.9423
7	1.2205	122.049	Dominant_Model	-16.7753
7	1.2305	123.049	Dominant_Model	-16.5504
7	1.2405	124.049	Dominant_Model	-20.4701
7	1.2505	125.049	Dominant_Model	-18.9419
7	1.2605	126.049	Dominant_Model	-20.1375
7	1.2705	127.049	Dominant_Model	-20.6382
7	1.2805	128.049	Dominant_Model	-7.2397
7	1.2905	129.049	Dominant_Model	-9.9667
7	1.3005	130.049	Dominant_Model	-18.5835
7	1.3105	131.049	Dominant_Model	-14.9679
7	1.3205	132.049	Dominant_Model	-9.9258
7	1.3305	133.049	Dominant_Model	-6.49
7	1.3405	134.049	Dominant_Model	-8.402
7	1.3505	135.049	Dominant_Model	-4.3212
8	0.0042	0.425	Dominant_Model	-20.9897
8	0.0142	1.425	Dominant_Model	-15.1015
8	0.0242	2.425	Dominant_Model	-19.858
8	0.0342	3.425	Dominant_Model	-20.9869
8	0.0442	4.425	Dominant_Model	-16.4985
8	0.0542	5.425	Dominant_Model	-20.9883
8	0.0642	6.425	Dominant_Model	-20.9897
8	0.0742	7.425	Dominant_Model	-20.9885
8	0.0842	8.425	Dominant_Model	-20.9896
8	0.0942	9.425	Dominant_Model	-20.989
8	0.1042	10.425	Dominant_Model	-20.9897
8	0.1142	11.425	Dominant_Model	-20.4285
8	0.1242	12.425	Dominant_Model	-20.9875
8	0.1342	13.425	Dominant_Model	-20.9047
8	0.1442	14.425	Dominant_Model	-18.0441
8	0.1542	15.425	Dominant_Model	-20.9895
8	0.1642	16.425	Dominant_Model	-20.9895
8	0.1742	17.425	Dominant_Model	-20.9491
8	0.1842	18.425	Dominant_Model	-20.2947
8	0.1942	19.425	Dominant_Model	-20.7865
8	0.2042	20.425	Dominant_Model	-20.2221
8	0.2142	21.425	Dominant_Model	-16.2409
8	0.2242	22.425	Dominant_Model	-20.9889
8	0.2342	23.425	Dominant_Model	-20.9897
8	0.2442	24.425	Dominant_Model	-20.9524
8	0.2542	25.425	Dominant_Model	-18.8191
8	0.2642	26.425	Dominant_Model	-20.6303
8	0.2742	27.425	Dominant_Model	-20.9897
8	0.2842	28.425	Dominant_Model	-20.9885
8	0.2942	29.425	Dominant_Model	-20.7693
8	0.3042	30.425	Dominant_Model	-20.9897
8	0.3142	31.425	Dominant_Model	-20.9897
8	0.3242	32.425	Dominant_Model	-20.9819
8	0.3342	33.425	Dominant_Model	-20.8564
8	0.3442	34.425	Dominant_Model	-20.9897
8	0.3542	35.425	Dominant_Model	-20.9897
8	0.3642	36.425	Dominant_Model	-20.9853
8	0.3742	37.425	Dominant_Model	-20.9896
8	0.3842	38.425	Dominant_Model	-20.9824
8	0.3942	39.425	Dominant_Model	-20.9897
8	0.4042	40.425	Dominant_Model	-20.4134
8	0.4142	41.425	Dominant_Model	-20.9897
8	0.4242	42.425	Dominant_Model	-20.9897
8	0.4342	43.425	Dominant_Model	-20.8252
8	0.4442	44.425	Dominant_Model	-19.2771
8	0.4542	45.425	Dominant_Model	-20.7684
8	0.4642	46.425	Dominant_Model	-16.8061
8	0.4742	47.425	Dominant_Model	-16.6792
8	0.4842	48.425	Dominant_Model	-19.0182
8	0.4942	49.425	Dominant_Model	-18.9305
8	0.5042	50.425	Dominant_Model	-20.9897
8	0.5142	51.425	Dominant_Model	-18.8801
8	0.5242	52.425	Dominant_Model	-20.9897
8	0.5342	53.425	Dominant_Model	-18.9659
8	0.5442	54.425	Dominant_Model	-19.7948
8	0.5542	55.425	Dominant_Model	-17.6965
8	0.5642	56.425	Dominant_Model	-19.6354
8	0.5742	57.425	Dominant_Model	-20.9806
8	0.5842	58.425	Dominant_Model	-20.7321
8	0.5942	59.425	Dominant_Model	-15.84
8	0.6042	60.425	Dominant_Model	-15.0806
8	0.6142	61.425	Dominant_Model	-15.2249
8	0.6242	62.425	Dominant_Model	-16.4754
8	0.6342	63.425	Dominant_Model	-20.4718
8	0.6442	64.425	Dominant_Model	-20.9897
8	0.6542	65.425	Dominant_Model	-18.8857
8	0.6642	66.425	Dominant_Model	-20.9882
8	0.6742	67.425	Dominant_Model	-19.8569
8	0.6842	68.425	Dominant_Model	-20.1972
8	0.6942	69.425	Dominant_Model	-20.9897
8	0.7042	70.425	Dominant_Model	-12.9836
8	0.7142	71.425	Dominant_Model	-14.7664
8	0.7242	72.425	Dominant_Model	-20.9897
8	0.7342	73.425	Dominant_Model	-20.9797
8	0.7442	74.425	Dominant_Model	-20.4526
8	0.7542	75.425	Dominant_Model	-20.9897
8	0.7642	76.425	Dominant_Model	-20.9897
8	0.7742	77.425	Dominant_Model	-20.9851
8	0.7842	78.425	Dominant_Model	-20.7138
8	0.7942	79.425	Dominant_Model	-20.9897
8	0.8042	80.425	Dominant_Model	-20.9897
8	0.8142	81.425	Dominant_Model	-20.9897
8	0.8242	82.425	Dominant_Model	-20.9897
8	0.8342	83.425	Dominant_Model	-20.9873
8	0.8442	84.425	Dominant_Model	-20.9897
8	0.8542	85.425	Dominant_Model	-20.9897
8	0.8642	86.425	Dominant_Model	-20.3687
8	0.8742	87.425	Dominant_Model	-20.9855
8	0.8842	88.425	Dominant_Model	-20.9897
8	0.8942	89.425	Dominant_Model	-20.9891
8	0.9042	90.425	Dominant_Model	-19.9277
8	0.9142	91.425	Dominant_Model	-20.9897
8	0.9242	92.425	Dominant_Model	-20.9896
8	0.9342	93.425	Dominant_Model	-20.9897
8	0.9442	94.425	Dominant_Model	-19.901
8	0.9542	95.425	Dominant_Model	-20.9897
8	0.9642	96.425	Dominant_Model	-20.652
8	0.9742	97.425	Dominant_Model	-19.4967
8	0.9842	98.425	Dominant_Model	-20.3982
8	0.9942	99.425	Dominant_Model	-20.8866
8	1.0042	100.425	Dominant_Model	-19.5763
8	1.0142	101.425	Dominant_Model	-20.9888
8	1.0242	102.425	Dominant_Model	-19.1851
8	1.0342	103.425	Dominant_Model	-20.9897
8	1.0442	104.425	Dominant_Model	-20.9573
8	1.0542	105.425	Dominant_Model	-20.9897
8	1.0642	106.425	Dominant_Model	-20.9897
8	1.0742	107.425	Dominant_Model	-20.9113
8	1.0842	108.425	Dominant_Model	-20.9897
8	1.0942	109.425	Dominant_Model	-20.9897
8	1.1042	110.425	Dominant_Model	-19.9747
8	1.1142	111.425	Dominant_Model	-20.988
8	1.1242	112.425	Dominant_Model	-20.9806
8	1.1342	113.425	Dominant_Model	-20.9802
8	1.1442	114.425	Dominant_Model	-20.2551
8	1.1542	115.425	Dominant_Model	-20.94
8	1.1642	116.425	Dominant_Model	-20.0492
8	1.1742	117.425	Dominant_Model	-20.9893
8	1.1842	118.425	Dominant_Model	-20.989
8	1.1942	119.425	Dominant_Model	-20.9882
8	1.2042	120.425	Dominant_Model	-20.9896
8	1.2142	121.425	Dominant_Model	-20.9897
8	1.2242	122.425	Dominant_Model	-19.8855
8	1.2342	123.425	Dominant_Model	-20.9718
8	1.2442	124.425	Dominant_Model	-20.9897
8	1.2542	125.425	Dominant_Model	-20.9896
8	1.2642	126.425	Dominant_Model	-20.9897
8	1.2742	127.425	Dominant_Model	-20.9896
8	1.2842	128.425	Dominant_Model	-20.842
8	1.2942	129.425	Dominant_Model	-20.9897
8	1.3042	130.425	Dominant_Model	-20.9897
8	1.3142	131.425	Dominant_Model	-20.9897
8	1.3242	132.425	Dominant_Model	-18.8299
8	1.3342	133.425	Dominant_Model	-19.6663
8	1.3442	134.425	Dominant_Model	-19.51
8	1.3542	135.425	Dominant_Model	-16.7243
8	1.3642	136.425	Dominant_Model	-20.0196
8	1.3742	137.425	Dominant_Model	-20.7897
8	1.3842	138.425	Dominant_Model	-18.7787
8	1.3942	139.425	Dominant_Model	-18.4075
8	1.4042	140.425	Dominant_Model	-20.103
8	1.4142	141.425	Dominant_Model	-16.8691
8	1.4242	142.425	Dominant_Model	-14.9404
8	1.4342	143.425	Dominant_Model	-20.9879
8	1.4442	144.425	Dominant_Model	-20.9897
8	1.4542	145.425	Dominant_Model	-20.989
8	1.4642	146.425	Dominant_Model	-20.9782
8	1.4742	147.425	Dominant_Model	-17.4132
8	1.4842	148.425	Dominant_Model	-8.3826
9	0.0002	0.022	Dominant_Model	-3.5685
9	0.0102	1.022	Dominant_Model	-14.8318
9	0.0202	2.022	Dominant_Model	-3.9637
9	0.0302	3.022	Dominant_Model	-12.006
9	0.0402	4.022	Dominant_Model	-14.2707
9	0.0502	5.022	Dominant_Model	-11.2059
9	0.0602	6.022	Dominant_Model	-13.5974
9	0.0702	7.022	Dominant_Model	-5.4001
9	0.0802	8.022	Dominant_Model	-4.3652
9	0.0902	9.022	Dominant_Model	-4.2892
9	0.1002	10.022	Dominant_Model	-6.4241
9	0.1102	11.022	Dominant_Model	-7.4987
9	0.1202	12.022	Dominant_Model	-18.8525
9	0.1302	13.022	Dominant_Model	-17.8291
9	0.1402	14.022	Dominant_Model	-20.8304
9	0.1502	15.022	Dominant_Model	-20.9667
9	0.1602	16.022	Dominant_Model	-8.503
9	0.1702	17.022	Dominant_Model	-8.8829
9	0.1802	18.022	Dominant_Model	-6.6113
9	0.1902	19.022	Dominant_Model	-7.6142
9	0.2002	20.022	Dominant_Model	-20.9884
9	0.2102	21.022	Dominant_Model	-20.9405
9	0.2202	22.022	Dominant_Model	-20.9877
9	0.2302	23.022	Dominant_Model	-18.8552
9	0.2402	24.022	Dominant_Model	-20.8806
9	0.2502	25.022	Dominant_Model	-18.6815
9	0.2602	26.022	Dominant_Model	-20.1912
9	0.2702	27.022	Dominant_Model	-16.1775
9	0.2802	28.022	Dominant_Model	-13.6545
9	0.2902	29.022	Dominant_Model	-13.5552
9	0.3002	30.022	Dominant_Model	-15.0662
9	0.3102	31.022	Dominant_Model	-20.1599
9	0.3202	32.022	Dominant_Model	-18.8927
9	0.3302	33.022	Dominant_Model	-17.8943
9	0.3402	34.022	Dominant_Model	-17.5622
9	0.3502	35.022	Dominant_Model	-20.9883
9	0.3602	36.022	Dominant_Model	-20.9326
9	0.3702	37.022	Dominant_Model	-17.7344
9	0.3802	38.022	Dominant_Model	-19.9449
9	0.3902	39.022	Dominant_Model	-17.4011
9	0.4002	40.022	Dominant_Model	-19.9602
9	0.4102	41.022	Dominant_Model	-20.4032
9	0.4202	42.022	Dominant_Model	-20.9775
9	0.4302	43.022	Dominant_Model	-18.9825
9	0.4402	44.022	Dominant_Model	-16.347
9	0.4502	45.022	Dominant_Model	-19.8359
9	0.4602	46.022	Dominant_Model	-20.0639
9	0.4702	47.022	Dominant_Model	-18.8262
9	0.4802	48.022	Dominant_Model	-18.6419
9	0.4902	49.022	Dominant_Model	-20.9708
9	0.5002	50.022	Dominant_Model	-20.763
9	0.5102	51.022	Dominant_Model	-19.459
9	0.5202	52.022	Dominant_Model	-19.9605
9	0.5302	53.022	Dominant_Model	-20.9834
9	0.5402	54.022	Dominant_Model	-17.838
9	0.5502	55.022	Dominant_Model	-19.7457
9	0.5602	56.022	Dominant_Model	-20.8764
9	0.5702	57.022	Dominant_Model	-17.5042
9	0.5802	58.022	Dominant_Model	-18.0017
9	0.5902	59.022	Dominant_Model	-16.5684
9	0.6002	60.022	Dominant_Model	-17.2416
9	0.6102	61.022	Dominant_Model	-20.7881
9	0.6202	62.022	Dominant_Model	-19.0757
9	0.6302	63.022	Dominant_Model	-17.1192
9	0.6402	64.022	Dominant_Model	-17.4368
9	0.6502	65.022	Dominant_Model	-20.0877
9	0.6602	66.022	Dominant_Model	-20.9646
9	0.6702	67.022	Dominant_Model	-16.9173
9	0.6802	68.022	Dominant_Model	-16.3028
9	0.6902	69.022	Dominant_Model	-16.5924
9	0.7002	70.022	Dominant_Model	-17.4624
9	0.7102	71.022	Dominant_Model	-17.7148
9	0.7202	72.022	Dominant_Model	-18.5052
9	0.7302	73.022	Dominant_Model	-20.8277
9	0.7402	74.022	Dominant_Model	-20.5313
9	0.7502	75.022	Dominant_Model	-19.6878
9	0.7602	76.022	Dominant_Model	-20.9047
9	0.7702	77.022	Dominant_Model	-18.9554
9	0.7802	78.022	Dominant_Model	-20.9766
9	0.7902	79.022	Dominant_Model	-19.162
9	0.8002	80.022	Dominant_Model	-14.8912
9	0.8102	81.022	Dominant_Model	-15.8633
9	0.8202	82.022	Dominant_Model	-17.5185
9	0.8302	83.022	Dominant_Model	-17.8763
9	0.8402	84.022	Dominant_Model	-19.9812
9	0.8502	85.022	Dominant_Model	-20.8953
9	0.8602	86.022	Dominant_Model	-20.3742
9	0.8702	87.022	Dominant_Model	-2.669
9	0.8802	88.022	Dominant_Model	-1.2352
9	0.8902	89.022	Dominant_Model	-1.0706
9	0.9002	90.022	Dominant_Model	-1.1954
9	0.9102	91.022	Dominant_Model	-1.533
9	0.9202	92.022	Dominant_Model	-2.1325
9	0.9302	93.022	Dominant_Model	-3.2256
9	0.9402	94.022	Dominant_Model	-6.3406
9	0.9502	95.022	Dominant_Model	-17.6587
9	0.9602	96.022	Dominant_Model	-17.0497
9	0.9702	97.022	Dominant_Model	-18.3795
9	0.9802	98.022	Dominant_Model	-20.4159
9	0.9902	99.022	Dominant_Model	-20.4161
9	1.0002	100.022	Dominant_Model	-18.6386
9	1.0102	101.022	Dominant_Model	-19.4045
9	1.0202	102.022	Dominant_Model	-11.2892
9	1.0302	103.022	Dominant_Model	-10.4011
9	1.0402	104.022	Dominant_Model	-10.4892
9	1.0502	105.022	Dominant_Model	-11.7839
9	1.0602	106.022	Dominant_Model	-14.7537
9	1.0702	107.022	Dominant_Model	-17.539
9	1.0802	108.022	Dominant_Model	-16.65
9	1.0902	109.022	Dominant_Model	-12.3792
9	1.1002	110.022	Dominant_Model	-11.924
9	1.1102	111.022	Dominant_Model	-15.2409
9	1.1202	112.022	Dominant_Model	-15.2048
9	1.1302	113.022	Dominant_Model	-19.7254
9	1.1402	114.022	Dominant_Model	-19.7404
9	1.1502	115.022	Dominant_Model	-18.4929
9	1.1602	116.022	Dominant_Model	-16.9399
9	1.1702	117.022	Dominant_Model	-18.753
9	1.1802	118.022	Dominant_Model	-20.9897
9	1.1902	119.022	Dominant_Model	-20.9882
9	1.2002	120.022	Dominant_Model	-18.3732
9	1.2102	121.022	Dominant_Model	-20.019
9	1.2202	122.022	Dominant_Model	-20.6758
9	1.2302	123.022	Dominant_Model	-18.3821
9	1.2402	124.022	Dominant_Model	-20.6724
9	1.2502	125.022	Dominant_Model	-17.3973
9	1.2602	126.022	Dominant_Model	-18.0837
9	1.2702	127.022	Dominant_Model	-19.9669
9	1.2802	128.022	Dominant_Model	-15.2814
9	1.2902	129.022	Dominant_Model	-14.6846
9	1.3002	130.022	Dominant_Model	-20.0723
9	1.3102	131.022	Dominant_Model	-20.2218
9	1.3202	132.022	Dominant_Model	-17.2753
9	1.3302	133.022	Dominant_Model	-17.8884
9	1.3402	134.022	Dominant_Model	-17.2656
9	1.3502	135.022	Dominant_Model	-18.1585
9	1.3602	136.022	Dominant_Model	-17.5305
9	1.3702	137.022	Dominant_Model	-20.9715
9	1.3802	138.022	Dominant_Model	-20.9897
9	1.3902	139.022	Dominant_Model	-20.9897
9	1.4002	140.022	Dominant_Model	-20.9897
9	1.4102	141.022	Dominant_Model	-20.9801
9	1.4202	142.022	Dominant_Model	-20.9897
9	1.4302	143.022	Dominant_Model	-20.2797
9	1.4402	144.022	Dominant_Model	-20.9717
9	1.4502	145.022	Dominant_Model	-17.6721
9	1.4602	146.022	Dominant_Model	-15.0109
9	1.4702	147.022	Dominant_Model	-15.8956
9	1.4802	148.022	Dominant_Model	-17.1465
9	1.4902	149.022	Dominant_Model	-15.4415
9	1.5002	150.022	Dominant_Model	-14.0477
9	1.5102	151.022	Dominant_Model	-15.8472
9	1.5202	152.022	Dominant_Model	-12.6368
9	1.5302	153.022	Dominant_Model	-13.0187
9	1.5402	154.022	Dominant_Model	-5.1183
10	0.0001	0.006	Dominant_Model	-8.0863
10	0.0101	1.006	Dominant_Model	-20.8288
10	0.0201	2.006	Dominant_Model	-16.1475
10	0.0301	3.006	Dominant_Model	-11.3608
10	0.0401	4.006	Dominant_Model	-8.2718
10	0.0501	5.006	Dominant_Model	-8.0405
10	0.0601	6.006	Dominant_Model	-9.1685
10	0.0701	7.006	Dominant_Model	-20.8798
10	0.0801	8.006	Dominant_Model	-20.215
10	0.0901	9.006	Dominant_Model	-19.8283
10	0.1001	10.006	Dominant_Model	-17.2156
10	0.1101	11.006	Dominant_Model	-14.8463
10	0.1201	12.006	Dominant_Model	-15.4744
10	0.1301	13.006	Dominant_Model	-12.2383
10	0.1401	14.006	Dominant_Model	-16.5536
10	0.1501	15.006	Dominant_Model	-19.7138
10	0.1601	16.006	Dominant_Model	-16.5419
10	0.1701	17.006	Dominant_Model	-20.9743
10	0.1801	18.006	Dominant_Model	-16.1978
10	0.1901	19.006	Dominant_Model	-15.283
10	0.2001	20.006	Dominant_Model	-16.1597
10	0.2101	21.006	Dominant_Model	-9.4445
10	0.2201	22.006	Dominant_Model	-5.9196
10	0.2301	23.006	Dominant_Model	-6.727
10	0.2401	24.006	Dominant_Model	-19.0845
10	0.2501	25.006	Dominant_Model	-5.9959
10	0.2601	26.006	Dominant_Model	-7.212
10	0.2701	27.006	Dominant_Model	-15.3699
10	0.2801	28.006	Dominant_Model	-13.8486
10	0.2901	29.006	Dominant_Model	-16.0274
10	0.3001	30.006	Dominant_Model	-13.6017
10	0.3101	31.006	Dominant_Model	-12.7224
10	0.3201	32.006	Dominant_Model	-16.1718
10	0.3301	33.006	Dominant_Model	-12.9655
10	0.3401	34.006	Dominant_Model	-12.6205
10	0.3501	35.006	Dominant_Model	-12.0647
10	0.3601	36.006	Dominant_Model	-9.0601
10	0.3701	37.006	Dominant_Model	-7.457
10	0.3801	38.006	Dominant_Model	-6.6833
10	0.3901	39.006	Dominant_Model	-6.2742
10	0.4001	40.006	Dominant_Model	-6.039
10	0.4101	41.006	Dominant_Model	-5.9162
10	0.4201	42.006	Dominant_Model	-5.882
10	0.4301	43.006	Dominant_Model	-5.9301
10	0.4401	44.006	Dominant_Model	-6.0673
10	0.4501	45.006	Dominant_Model	-6.3171
10	0.4601	46.006	Dominant_Model	-6.736
10	0.4701	47.006	Dominant_Model	-7.4776
10	0.4801	48.006	Dominant_Model	-9.1981
10	0.4901	49.006	Dominant_Model	-14.582
10	0.5001	50.006	Dominant_Model	-17.5484
10	0.5101	51.006	Dominant_Model	-18.1044
10	0.5201	52.006	Dominant_Model	-16.8938
10	0.5301	53.006	Dominant_Model	-12.3003
10	0.5401	54.006	Dominant_Model	-12.916
10	0.5501	55.006	Dominant_Model	-13.5816
10	0.5601	56.006	Dominant_Model	-14.4128
10	0.5701	57.006	Dominant_Model	-13.3144
10	0.5801	58.006	Dominant_Model	-13.4956
10	0.5901	59.006	Dominant_Model	-13.1782
10	0.6001	60.006	Dominant_Model	-16.2492
10	0.6101	61.006	Dominant_Model	-10.2436
10	0.6201	62.006	Dominant_Model	-7.4215
10	0.6301	63.006	Dominant_Model	-15.3668
10	0.6401	64.006	Dominant_Model	-15.8124
10	0.6501	65.006	Dominant_Model	-17.8935
10	0.6601	66.006	Dominant_Model	-13.3456
10	0.6701	67.006	Dominant_Model	-14.6945
10	0.6801	68.006	Dominant_Model	-20.574
10	0.6901	69.006	Dominant_Model	-18.127
10	0.7001	70.006	Dominant_Model	-20.9048
10	0.7101	71.006	Dominant_Model	-7.3179
10	0.7201	72.006	Dominant_Model	-5.1373
10	0.7301	73.006	Dominant_Model	-4.4281
10	0.7401	74.006	Dominant_Model	-4.2515
10	0.7501	75.006	Dominant_Model	-4.5421
10	0.7601	76.006	Dominant_Model	-5.8021
10	0.7701	77.006	Dominant_Model	-9.0519
10	0.7801	78.006	Dominant_Model	-7.6219
10	0.7901	79.006	Dominant_Model	-4.462
11	0.0002	0.022	Dominant_Model	-5.1156
11	0.0102	1.022	Dominant_Model	-14.9619
11	0.0202	2.022	Dominant_Model	-12.1416
11	0.0302	3.022	Dominant_Model	-13.0744
11	0.0402	4.022	Dominant_Model	-14.9869
11	0.0502	5.022	Dominant_Model	-14.9897
11	0.0602	6.022	Dominant_Model	-18.4496
11	0.0702	7.022	Dominant_Model	-15.1247
11	0.0802	8.022	Dominant_Model	-18.0146
11	0.0902	9.022	Dominant_Model	-17.3319
11	0.1002	10.022	Dominant_Model	-19.7995
11	0.1102	11.022	Dominant_Model	-20.6845
11	0.1202	12.022	Dominant_Model	-20.444
11	0.1302	13.022	Dominant_Model	-19.0969
11	0.1402	14.022	Dominant_Model	-19.966
11	0.1502	15.022	Dominant_Model	-19.4952
11	0.1602	16.022	Dominant_Model	-19.7671
11	0.1702	17.022	Dominant_Model	-20.5347
11	0.1802	18.022	Dominant_Model	-20.9897
11	0.1902	19.022	Dominant_Model	-20.9857
11	0.2002	20.022	Dominant_Model	-20.9624
11	0.2102	21.022	Dominant_Model	-20.8277
11	0.2202	22.022	Dominant_Model	-20.399
11	0.2302	23.022	Dominant_Model	-20.3217
11	0.2402	24.022	Dominant_Model	-19.7209
11	0.2502	25.022	Dominant_Model	-20.8422
11	0.2602	26.022	Dominant_Model	-20.9865
11	0.2702	27.022	Dominant_Model	-20.1869
11	0.2802	28.022	Dominant_Model	-20.0422
11	0.2902	29.022	Dominant_Model	-20.1378
11	0.3002	30.022	Dominant_Model	-19.8851
11	0.3102	31.022	Dominant_Model	-20.8722
11	0.3202	32.022	Dominant_Model	-20.9316
11	0.3302	33.022	Dominant_Model	-19.6824
11	0.3402	34.022	Dominant_Model	-19.8739
11	0.3502	35.022	Dominant_Model	-20.9773
11	0.3602	36.022	Dominant_Model	-20.8724
11	0.3702	37.022	Dominant_Model	-20.3752
11	0.3802	38.022	Dominant_Model	-13.6557
11	0.3902	39.022	Dominant_Model	-12.7037
11	0.4002	40.022	Dominant_Model	-12.7275
11	0.4102	41.022	Dominant_Model	-13.7687
11	0.4202	42.022	Dominant_Model	-20.7027
11	0.4302	43.022	Dominant_Model	-20.4954
11	0.4402	44.022	Dominant_Model	-16.6861
11	0.4502	45.022	Dominant_Model	-20.788
11	0.4602	46.022	Dominant_Model	-20.4093
11	0.4702	47.022	Dominant_Model	-19.8055
11	0.4802	48.022	Dominant_Model	-19.2714
11	0.4902	49.022	Dominant_Model	-20.1998
11	0.5002	50.022	Dominant_Model	-20.587
11	0.5102	51.022	Dominant_Model	-20.946
11	0.5202	52.022	Dominant_Model	-20.6717
11	0.5302	53.022	Dominant_Model	-20.5962
11	0.5402	54.022	Dominant_Model	-19.9271
11	0.5502	55.022	Dominant_Model	-20.8602
11	0.5602	56.022	Dominant_Model	-20.6993
11	0.5702	57.022	Dominant_Model	-20.1504
11	0.5802	58.022	Dominant_Model	-20.2695
11	0.5902	59.022	Dominant_Model	-20.3878
11	0.6002	60.022	Dominant_Model	-20.3104
11	0.6102	61.022	Dominant_Model	-20.8371
11	0.6202	62.022	Dominant_Model	-20.9573
11	0.6302	63.022	Dominant_Model	-16.8156
11	0.6402	64.022	Dominant_Model	-18.9169
11	0.6502	65.022	Dominant_Model	-14.3514
11	0.6602	66.022	Dominant_Model	-20.9553
11	0.6702	67.022	Dominant_Model	-20.8952
11	0.6802	68.022	Dominant_Model	-17.956
11	0.6902	69.022	Dominant_Model	-19.9369
11	0.7002	70.022	Dominant_Model	-17.9285
11	0.7102	71.022	Dominant_Model	-13.2082
11	0.7202	72.022	Dominant_Model	-20.8443
11	0.7302	73.022	Dominant_Model	-20.566
11	0.7402	74.022	Dominant_Model	-20.2196
11	0.7502	75.022	Dominant_Model	-20.9891
11	0.7602	76.022	Dominant_Model	-16.5355
11	0.7702	77.022	Dominant_Model	-20.8568
11	0.7802	78.022	Dominant_Model	-19.8667
11	0.7902	79.022	Dominant_Model	-20.9153
11	0.8002	80.022	Dominant_Model	-20.8696
11	0.8102	81.022	Dominant_Model	-14.1747
11	0.8202	82.022	Dominant_Model	-11.6014
11	0.8302	83.022	Dominant_Model	-15.4879
11	0.8402	84.022	Dominant_Model	-11.213
11	0.8502	85.022	Dominant_Model	-14.9783
11	0.8602	86.022	Dominant_Model	-8.9776
11	0.8702	87.022	Dominant_Model	-2.963
11	0.8802	88.022	Dominant_Model	-4.329
12	0.0008	0.08	Dominant_Model	-5.8598
12	0.0108	1.08	Dominant_Model	-8.7692
12	0.0208	2.08	Dominant_Model	-9.4706
12	0.0308	3.08	Dominant_Model	-11.4013
12	0.0408	4.08	Dominant_Model	-14.2481
12	0.0508	5.08	Dominant_Model	-9.2835
12	0.0608	6.08	Dominant_Model	-9.433
12	0.0708	7.08	Dominant_Model	-14.5831
12	0.0808	8.08	Dominant_Model	-14.4851
12	0.0908	9.08	Dominant_Model	-14.9897
12	0.1008	10.08	Dominant_Model	-14.9897
12	0.1108	11.08	Dominant_Model	-14.9882
12	0.1208	12.08	Dominant_Model	-14.9897
12	0.1308	13.08	Dominant_Model	-14.9897
12	0.1408	14.08	Dominant_Model	-14.9868
12	0.1508	15.08	Dominant_Model	-14.9897
12	0.1608	16.08	Dominant_Model	-14.9897
12	0.1708	17.08	Dominant_Model	-14.9896
12	0.1808	18.08	Dominant_Model	-14.9768
12	0.1908	19.08	Dominant_Model	-13.9329
12	0.2008	20.08	Dominant_Model	-12.1162
12	0.2108	21.08	Dominant_Model	-14.1681
12	0.2208	22.08	Dominant_Model	-10.8972
12	0.2308	23.08	Dominant_Model	-9.7569
12	0.2408	24.08	Dominant_Model	-14.9896
12	0.2508	25.08	Dominant_Model	-14.9543
12	0.2608	26.08	Dominant_Model	-13.3045
12	0.2708	27.08	Dominant_Model	-12.6632
12	0.2808	28.08	Dominant_Model	-14.2679
12	0.2908	29.08	Dominant_Model	-14.9897
12	0.3008	30.08	Dominant_Model	-9.695
12	0.3108	31.08	Dominant_Model	-14.9888
12	0.3208	32.08	Dominant_Model	-11.6986
12	0.3308	33.08	Dominant_Model	-14.9897
12	0.3408	34.08	Dominant_Model	-14.9897
12	0.3508	35.08	Dominant_Model	-14.1585
12	0.3608	36.08	Dominant_Model	-14.9897
12	0.3708	37.08	Dominant_Model	-14.9663
12	0.3808	38.08	Dominant_Model	-10.0206
12	0.3908	39.08	Dominant_Model	-9.5304
12	0.4008	40.08	Dominant_Model	-10.7529
12	0.4108	41.08	Dominant_Model	-7.1458
12	0.4208	42.08	Dominant_Model	-8.1822
12	0.4308	43.08	Dominant_Model	-9.5804
12	0.4408	44.08	Dominant_Model	-12.1039
12	0.4508	45.08	Dominant_Model	-8.4255
12	0.4608	46.08	Dominant_Model	-9.1677
12	0.4708	47.08	Dominant_Model	-6.5396
12	0.4808	48.08	Dominant_Model	-6.4042
12	0.4908	49.08	Dominant_Model	-7.6191
12	0.5008	50.08	Dominant_Model	-9.2559
12	0.5108	51.08	Dominant_Model	-4.0793
12	0.5208	52.08	Dominant_Model	-3.7569
12	0.5308	53.08	Dominant_Model	-3.9162
12	0.5408	54.08	Dominant_Model	-4.5991
12	0.5508	55.08	Dominant_Model	-15.6544
12	0.5608	56.08	Dominant_Model	-13.7807
12	0.5708	57.08	Dominant_Model	-12.3872
12	0.5808	58.08	Dominant_Model	-20.9801
12	0.5908	59.08	Dominant_Model	-14.7378
12	0.6008	60.08	Dominant_Model	-19.9867
12	0.6108	61.08	Dominant_Model	-20.9882
12	0.6208	62.08	Dominant_Model	-20.9897
12	0.6308	63.08	Dominant_Model	-20.9897
12	0.6408	64.08	Dominant_Model	-3.6587
13	0.0009	0.089	Dominant_Model	-9.2255
13	0.0109	1.089	Dominant_Model	-19.9608
13	0.0209	2.089	Dominant_Model	-15.5054
13	0.0309	3.089	Dominant_Model	-18.1229
13	0.0409	4.089	Dominant_Model	-20.9219
13	0.0509	5.089	Dominant_Model	-17.7466
13	0.0609	6.089	Dominant_Model	-19.5385
13	0.0709	7.089	Dominant_Model	-17.9267
13	0.0809	8.089	Dominant_Model	-20.9441
13	0.0909	9.089	Dominant_Model	-17.3829
13	0.1009	10.089	Dominant_Model	-20.4859
13	0.1109	11.089	Dominant_Model	-20.6099
13	0.1209	12.089	Dominant_Model	-20.9296
13	0.1309	13.089	Dominant_Model	-20.8298
13	0.1409	14.089	Dominant_Model	-20.9859
13	0.1509	15.089	Dominant_Model	-20.3901
13	0.1609	16.089	Dominant_Model	-20.3125
13	0.1709	17.089	Dominant_Model	-20.2543
13	0.1809	18.089	Dominant_Model	-19.9281
13	0.1909	19.089	Dominant_Model	-20.9228
13	0.2009	20.089	Dominant_Model	-20.7471
13	0.2109	21.089	Dominant_Model	-20.0499
13	0.2209	22.089	Dominant_Model	-20.2837
13	0.2309	23.089	Dominant_Model	-20.4384
13	0.2409	24.089	Dominant_Model	-19.9931
13	0.2509	25.089	Dominant_Model	-20.7499
13	0.2609	26.089	Dominant_Model	-20.8961
13	0.2709	27.089	Dominant_Model	-20.9559
13	0.2809	28.089	Dominant_Model	-20.7228
13	0.2909	29.089	Dominant_Model	-20.8959
13	0.3009	30.089	Dominant_Model	-20.3096
13	0.3109	31.089	Dominant_Model	-20.9392
13	0.3209	32.089	Dominant_Model	-20.9692
13	0.3309	33.089	Dominant_Model	-16.3401
13	0.3409	34.089	Dominant_Model	-15.4101
13	0.3509	35.089	Dominant_Model	-20.7335
13	0.3609	36.089	Dominant_Model	-12.8199
13	0.3709	37.089	Dominant_Model	-13.1933
13	0.3809	38.089	Dominant_Model	-20.9813
13	0.3909	39.089	Dominant_Model	-19.6191
13	0.4009	40.089	Dominant_Model	-17.1797
13	0.4109	41.089	Dominant_Model	-17.1354
13	0.4209	42.089	Dominant_Model	-14.3771
13	0.4309	43.089	Dominant_Model	-14.6956
13	0.4409	44.089	Dominant_Model	-18.0621
13	0.4509	45.089	Dominant_Model	-18.6957
13	0.4609	46.089	Dominant_Model	-17.5374
13	0.4709	47.089	Dominant_Model	-18.3753
13	0.4809	48.089	Dominant_Model	-20.6103
13	0.4909	49.089	Dominant_Model	-18.8771
13	0.5009	50.089	Dominant_Model	-6.8083
13	0.5109	51.089	Dominant_Model	-5.6763
13	0.5209	52.089	Dominant_Model	-5.0687
13	0.5309	53.089	Dominant_Model	-4.6742
13	0.5409	54.089	Dominant_Model	-4.3973
13	0.5509	55.089	Dominant_Model	-4.1962
13	0.5609	56.089	Dominant_Model	-4.0489
13	0.5709	57.089	Dominant_Model	-3.9425
13	0.5809	58.089	Dominant_Model	-3.8689
13	0.5909	59.089	Dominant_Model	-3.823
13	0.6009	60.089	Dominant_Model	-3.8014
13	0.6109	61.089	Dominant_Model	-3.8018
13	0.6209	62.089	Dominant_Model	-3.8231
13	0.6309	63.089	Dominant_Model	-3.8646
13	0.6409	64.089	Dominant_Model	-3.9265
13	0.6509	65.089	Dominant_Model	-4.0094
13	0.6609	66.089	Dominant_Model	-4.1149
13	0.6709	67.089	Dominant_Model	-4.2451
13	0.6809	68.089	Dominant_Model	-4.4032
13	0.6909	69.089	Dominant_Model	-4.594
13	0.7009	70.089	Dominant_Model	-4.8241
13	0.7109	71.089	Dominant_Model	-5.1032
13	0.7209	72.089	Dominant_Model	-5.4463
13	0.7309	73.089	Dominant_Model	-5.8774
13	0.7409	74.089	Dominant_Model	-6.439
13	0.7509	75.089	Dominant_Model	-7.2163
13	0.7609	76.089	Dominant_Model	-8.4254
13	0.7709	77.089	Dominant_Model	-11.004
13	0.7809	78.089	Dominant_Model	-20.9884
13	0.7909	79.089	Dominant_Model	-20.9897
13	0.8009	80.089	Dominant_Model	-20.977
13	0.8109	81.089	Dominant_Model	-20.9767
13	0.8209	82.089	Dominant_Model	-20.9897
13	0.8309	83.089	Dominant_Model	-20.9845
13	0.8409	84.089	Dominant_Model	-20.9897
13	0.8509	85.089	Dominant_Model	-20.9889
13	0.8609	86.089	Dominant_Model	-20.9885
13	0.8709	87.089	Dominant_Model	-20.95
13	0.8809	88.089	Dominant_Model	-20.9893
13	0.8909	89.089	Dominant_Model	-20.9897
13	0.9009	90.089	Dominant_Model	-20.9883
13	0.9109	91.089	Dominant_Model	-20.9897
13	0.9209	92.089	Dominant_Model	-19.6964
13	0.9309	93.089	Dominant_Model	-20.0692
13	0.9409	94.089	Dominant_Model	-20.9897
13	0.9509	95.089	Dominant_Model	-20.9884
13	0.9609	96.089	Dominant_Model	-20.9897
13	0.9709	97.089	Dominant_Model	-20.9883
13	0.9809	98.089	Dominant_Model	-20.9271
13	0.9909	99.089	Dominant_Model	-20.908
13	1.0009	100.089	Dominant_Model	-20.9261
13	1.0109	101.089	Dominant_Model	-20.9897
13	1.0209	102.089	Dominant_Model	-19.9445
13	1.0309	103.089	Dominant_Model	-20.9609
13	1.0409	104.089	Dominant_Model	-20.4615
13	1.0509	105.089	Dominant_Model	-20.9854
13	1.0609	106.089	Dominant_Model	-20.9889
13	1.0709	107.089	Dominant_Model	-20.7013
13	1.0809	108.089	Dominant_Model	-19.4055
13	1.0909	109.089	Dominant_Model	-16.3579
13	1.1009	110.089	Dominant_Model	-16.0888
13	1.1109	111.089	Dominant_Model	-17.2656
13	1.1209	112.089	Dominant_Model	-20.9897
13	1.1309	113.089	Dominant_Model	-18.104
13	1.1409	114.089	Dominant_Model	-19.2136
13	1.1509	115.089	Dominant_Model	-19.2425
13	1.1609	116.089	Dominant_Model	-20.9897
13	1.1709	117.089	Dominant_Model	-20.9777
13	1.1809	118.089	Dominant_Model	-20.9877
13	1.1909	119.089	Dominant_Model	-20.9897
13	1.2009	120.089	Dominant_Model	-16.8118
13	1.2109	121.089	Dominant_Model	-16.5168
13	1.2209	122.089	Dominant_Model	-18.1336
13	1.2309	123.089	Dominant_Model	-20.4401
13	1.2409	124.089	Dominant_Model	-18.1828
13	1.2509	125.089	Dominant_Model	-20.9561
13	1.2609	126.089	Dominant_Model	-16.2151
13	1.2709	127.089	Dominant_Model	-15.6174
13	1.2809	128.089	Dominant_Model	-16.1073
13	1.2909	129.089	Dominant_Model	-19.6596
13	1.3009	130.089	Dominant_Model	-18.8584
13	1.3109	131.089	Dominant_Model	-20.9872
13	1.3209	132.089	Dominant_Model	-20.9897
13	1.3309	133.089	Dominant_Model	-20.7067
13	1.3409	134.089	Dominant_Model	-20.9499
13	1.3509	135.089	Dominant_Model	-20.9897
13	1.3609	136.089	Dominant_Model	-18.1147
13	1.3709	137.089	Dominant_Model	-18.7343
13	1.3809	138.089	Dominant_Model	-20.9897
13	1.3909	139.089	Dominant_Model	-20.9433
13	1.4009	140.089	Dominant_Model	-19.7421
13	1.4109	141.089	Dominant_Model	-20.9803
13	1.4209	142.089	Dominant_Model	-20.9897
13	1.4309	143.089	Dominant_Model	-13.4905
13	1.4409	144.089	Dominant_Model	-16.5147
13	1.4509	145.089	Dominant_Model	-20.9897
13	1.4609	146.089	Dominant_Model	-19.3122
13	1.4709	147.089	Dominant_Model	-20.9897
13	1.4809	148.089	Dominant_Model	-20.9886
13	1.4909	149.089	Dominant_Model	-20.877
13	1.5009	150.089	Dominant_Model	-20.8798
13	1.5109	151.089	Dominant_Model	-20.9838
13	1.5209	152.089	Dominant_Model	-19.2494
13	1.5309	153.089	Dominant_Model	-20.5271
13	1.5409	154.089	Dominant_Model	-20.9897
13	1.5509	155.089	Dominant_Model	-20.9746
13	1.5609	156.089	Dominant_Model	-20.8963
13	1.5709	157.089	Dominant_Model	-13.9727
13	1.5809	158.089	Dominant_Model	-9.4626
13	1.5909	159.089	Dominant_Model	-12.9425
13	1.6009	160.089	Dominant_Model	-20.9892
13	1.6109	161.089	Dominant_Model	-20.9897
13	1.6209	162.089	Dominant_Model	-20.9629
13	1.6309	163.089	Dominant_Model	-20.9885
13	1.6409	164.089	Dominant_Model	-20.8553
13	1.6509	165.089	Dominant_Model	-20.6243
13	1.6609	166.089	Dominant_Model	-20.8509
13	1.6709	167.089	Dominant_Model	-20.9896
13	1.6809	168.089	Dominant_Model	-20.9806
13	1.6909	169.089	Dominant_Model	-20.9897
13	1.7009	170.089	Dominant_Model	-20.9897
13	1.7109	171.089	Dominant_Model	-19.2666
13	1.7209	172.089	Dominant_Model	-20.9897
13	1.7309	173.089	Dominant_Model	-20.9897
13	1.7409	174.089	Dominant_Model	-20.6579
13	1.7509	175.089	Dominant_Model	-20.9885
13	1.7609	176.089	Dominant_Model	-19.9377
13	1.7709	177.089	Dominant_Model	-20.9891
13	1.7809	178.089	Dominant_Model	-20.9897
13	1.7909	179.089	Dominant_Model	-20.9897
13	1.8009	180.089	Dominant_Model	-19.8673
13	1.8109	181.089	Dominant_Model	-20.9897
13	1.8209	182.089	Dominant_Model	-20.6825
13	1.8309	183.089	Dominant_Model	-20.9896
13	1.8409	184.089	Dominant_Model	-20.9897
13	1.8509	185.089	Dominant_Model	-20.0887
13	1.8609	186.089	Dominant_Model	-20.9801
13	1.8709	187.089	Dominant_Model	-20.9897
13	1.8809	188.089	Dominant_Model	-20.9897
13	1.8909	189.089	Dominant_Model	-20.9897
13	1.9009	190.089	Dominant_Model	-20.9897
13	1.9109	191.089	Dominant_Model	-20.6178
13	1.9209	192.089	Dominant_Model	-15.2986
13	1.9309	193.089	Dominant_Model	-20.9897
13	1.9409	194.089	Dominant_Model	-20.9673
13	1.9509	195.089	Dominant_Model	-20.9897
13	1.9609	196.089	Dominant_Model	-20.9897
13	1.9709	197.089	Dominant_Model	-20.9795
13	1.9809	198.089	Dominant_Model	-20.9895
13	1.9909	199.089	Dominant_Model	-20.9897
13	2.0009	200.089	Dominant_Model	-20.9897
13	2.0109	201.089	Dominant_Model	-17.968
13	2.0209	202.089	Dominant_Model	-18.9611
13	2.0309	203.089	Dominant_Model	-20.3778
13	2.0409	204.089	Dominant_Model	-19.5416
13	2.0509	205.089	Dominant_Model	-19.9647
13	2.0609	206.089	Dominant_Model	-19.6507
13	2.0709	207.089	Dominant_Model	-19.2469
13	2.0809	208.089	Dominant_Model	-14.7184
13	2.0909	209.089	Dominant_Model	-8.2624
13	2.1009	210.089	Dominant_Model	-7.5495
13	2.1109	211.089	Dominant_Model	-7.862
13	2.1209	212.089	Dominant_Model	-10.0411
13	2.1309	213.089	Dominant_Model	-18.9899
13	2.1409	214.089	Dominant_Model	-19.0749
13	2.1509	215.089	Dominant_Model	-20.8307
13	2.1609	216.089	Dominant_Model	-20.6362
13	2.1709	217.089	Dominant_Model	-18.5254
13	2.1809	218.089	Dominant_Model	-7.4809
13	2.1909	219.089	Dominant_Model	-5.6169
14	0.0025	0.247	Dominant_Model	-8.2609
14	0.0125	1.247	Dominant_Model	-17.5232
14	0.0225	2.247	Dominant_Model	-14.7124
14	0.0325	3.247	Dominant_Model	-20.6162
14	0.0425	4.247	Dominant_Model	-20.631
14	0.0525	5.247	Dominant_Model	-20.5097
14	0.0625	6.247	Dominant_Model	-19.3546
14	0.0725	7.247	Dominant_Model	-18.2076
14	0.0825	8.247	Dominant_Model	-12.4024
14	0.0925	9.247	Dominant_Model	-13.4065
14	0.1025	10.247	Dominant_Model	-15.868
14	0.1125	11.247	Dominant_Model	-15.24
14	0.1225	12.247	Dominant_Model	-16.198
14	0.1325	13.247	Dominant_Model	-15.7115
14	0.1425	14.247	Dominant_Model	-14.0935
14	0.1525	15.247	Dominant_Model	-14.7489
14	0.1625	16.247	Dominant_Model	-15.3538
14	0.1725	17.247	Dominant_Model	-13.5128
14	0.1825	18.247	Dominant_Model	-13.1763
14	0.1925	19.247	Dominant_Model	-14.0185
14	0.2025	20.247	Dominant_Model	-15.5131
14	0.2125	21.247	Dominant_Model	-12.6544
14	0.2225	22.247	Dominant_Model	-16.159
14	0.2325	23.247	Dominant_Model	-10.3619
14	0.2425	24.247	Dominant_Model	-9.9247
14	0.2525	25.247	Dominant_Model	-8.3056
14	0.2625	26.247	Dominant_Model	-8.8522
14	0.2725	27.247	Dominant_Model	-8.714
14	0.2825	28.247	Dominant_Model	-9.093
14	0.2925	29.247	Dominant_Model	-8.6068
14	0.3025	30.247	Dominant_Model	-9.7743
14	0.3125	31.247	Dominant_Model	-7.5755
14	0.3225	32.247	Dominant_Model	-7.3062
14	0.3325	33.247	Dominant_Model	-7.8612
14	0.3425	34.247	Dominant_Model	-8.7357
14	0.3525	35.247	Dominant_Model	-8.2101
14	0.3625	36.247	Dominant_Model	-8.4265
14	0.3725	37.247	Dominant_Model	-8.5356
14	0.3825	38.247	Dominant_Model	-9.2724
14	0.3925	39.247	Dominant_Model	-8.9968
14	0.4025	40.247	Dominant_Model	-8.2518
14	0.4125	41.247	Dominant_Model	-9.7234
14	0.4225	42.247	Dominant_Model	-8.1404
14	0.4325	43.247	Dominant_Model	-9.4799
14	0.4425	44.247	Dominant_Model	-8.7581
14	0.4525	45.247	Dominant_Model	-10.2428
14	0.4625	46.247	Dominant_Model	-9.5438
14	0.4725	47.247	Dominant_Model	-8.9832
14	0.4825	48.247	Dominant_Model	-8.6121
14	0.4925	49.247	Dominant_Model	-9.6811
14	0.5025	50.247	Dominant_Model	-8.2235
14	0.5125	51.247	Dominant_Model	-7.2673
14	0.5225	52.247	Dominant_Model	-7.3509
14	0.5325	53.247	Dominant_Model	-8.1245
14	0.5425	54.247	Dominant_Model	-7.4105
14	0.5525	55.247	Dominant_Model	-10.0894
14	0.5625	56.247	Dominant_Model	-9.5115
14	0.5725	57.247	Dominant_Model	-7.9601
14	0.5825	58.247	Dominant_Model	-8.9594
14	0.5925	59.247	Dominant_Model	-9.2533
14	0.6025	60.247	Dominant_Model	-9.0814
14	0.6125	61.247	Dominant_Model	-8.1149
[truncated: 473 more rows]
