# Supplementary material for: Pilot study of large-scale production of mutant pigs by ENU mutagenesis
Source: eLife. 2017 Jun 22;6:e26248. doi: 10.7554/eLife.26248 (PMC5505698; doi:10.7554/eLife.26248)
Supplement: Figure 5—source data 1. — DOI: http://dx.doi.org/10.7554/eLife.26248.014 [file elife-26248-fig5-data1.xlsx]

## Sheet: merlin-parametric
CHR	POS	LABEL (Mb)	MODEL	LOD score
1	0.0029	0.287	Recessive	-6.0344
1	0.0129	1.287	Recessive	-18.7044
1	0.0229	2.287	Recessive	-17.5318
1	0.0329	3.287	Recessive	-18.6863
1	0.0429	4.287	Recessive	-18.1173
1	0.0529	5.287	Recessive	-18.665
1	0.0629	6.287	Recessive	-17.1694
1	0.0729	7.287	Recessive	-18.6617
1	0.0829	8.287	Recessive	-15.8026
1	0.0929	9.287	Recessive	-18.6085
1	0.1029	10.287	Recessive	-16.3043
1	0.1129	11.287	Recessive	-18.7138
1	0.1229	12.287	Recessive	-18.6961
1	0.1329	13.287	Recessive	-17.2604
1	0.1429	14.287	Recessive	-17.1825
1	0.1529	15.287	Recessive	-14.942
1	0.1629	16.287	Recessive	-18.6267
1	0.1729	17.287	Recessive	-12.9331
1	0.1829	18.287	Recessive	-18.0765
1	0.1929	19.287	Recessive	-9.3039
1	0.2029	20.287	Recessive	-4.0368
1	0.2129	21.287	Recessive	-14.1727
1	0.2229	22.287	Recessive	-14.6398
1	0.2329	23.287	Recessive	-10.5571
1	0.2429	24.287	Recessive	-13.8854
1	0.2529	25.287	Recessive	-8.594
1	0.2629	26.287	Recessive	-18.1802
1	0.2729	27.287	Recessive	-18.0711
1	0.2829	28.287	Recessive	-12.0559
1	0.2929	29.287	Recessive	-16.6847
1	0.3029	30.287	Recessive	-14.3974
1	0.3129	31.287	Recessive	-12.1026
1	0.3229	32.287	Recessive	-13.5847
1	0.3329	33.287	Recessive	-16.4613
1	0.3429	34.287	Recessive	-16.0023
1	0.3529	35.287	Recessive	-9.5645
1	0.3629	36.287	Recessive	-8.2591
1	0.3729	37.287	Recessive	-15.6028
1	0.3829	38.287	Recessive	-11.4151
1	0.3929	39.287	Recessive	-11.3594
1	0.4029	40.287	Recessive	-18.3118
1	0.4129	41.287	Recessive	-16.6698
1	0.4229	42.287	Recessive	-12.388
1	0.4329	43.287	Recessive	-9.1946
1	0.4429	44.287	Recessive	-18.5581
1	0.4529	45.287	Recessive	-18.2484
1	0.4629	46.287	Recessive	-15.6646
1	0.4729	47.287	Recessive	-14.2566
1	0.4829	48.287	Recessive	-17.5496
1	0.4929	49.287	Recessive	-18.7081
1	0.5029	50.287	Recessive	-18.7159
1	0.5129	51.287	Recessive	-12.2225
1	0.5229	52.287	Recessive	-18.0636
1	0.5329	53.287	Recessive	-18.4425
1	0.5429	54.287	Recessive	-8.6878
1	0.5529	55.287	Recessive	-12.806
1	0.5629	56.287	Recessive	-6.4188
1	0.5729	57.287	Recessive	-12.7743
1	0.5829	58.287	Recessive	-18.5774
1	0.5929	59.287	Recessive	-18.4714
1	0.6029	60.287	Recessive	-14.8717
1	0.6129	61.287	Recessive	-8.2523
1	0.6229	62.287	Recessive	-13.5315
1	0.6329	63.287	Recessive	-18.6981
1	0.6429	64.287	Recessive	-10.6189
1	0.6529	65.287	Recessive	-18.3489
1	0.6629	66.287	Recessive	-18.2716
1	0.6729	67.287	Recessive	-13.3256
1	0.6829	68.287	Recessive	-10.7938
1	0.6929	69.287	Recessive	-6.9259
1	0.7029	70.287	Recessive	-5.0738
1	0.7129	71.287	Recessive	-17.5442
1	0.7229	72.287	Recessive	-15.8212
1	0.7329	73.287	Recessive	-13.7431
1	0.7429	74.287	Recessive	-8.9959
1	0.7529	75.287	Recessive	-8.8937
1	0.7629	76.287	Recessive	-13.0336
1	0.7729	77.287	Recessive	-4.9169
1	0.7829	78.287	Recessive	-15.8174
1	0.7929	79.287	Recessive	-14.8522
1	0.8029	80.287	Recessive	-14.4275
1	0.8129	81.287	Recessive	-10.3234
1	0.8229	82.287	Recessive	-14.2297
1	0.8329	83.287	Recessive	-16.0118
1	0.8429	84.287	Recessive	-18.3991
1	0.8529	85.287	Recessive	-11.3301
1	0.8629	86.287	Recessive	-12.8506
1	0.8729	87.287	Recessive	-14.9707
1	0.8829	88.287	Recessive	-16.7164
1	0.8929	89.287	Recessive	-14.4571
1	0.9029	90.287	Recessive	-18.7126
1	0.9129	91.287	Recessive	-18.698
1	0.9229	92.287	Recessive	-13.0115
1	0.9329	93.287	Recessive	-10.8495
1	0.9429	94.287	Recessive	-10.1426
1	0.9529	95.287	Recessive	-16.8149
1	0.9629	96.287	Recessive	-18.2668
1	0.9729	97.287	Recessive	-15.7778
1	0.9829	98.287	Recessive	-7.4748
1	0.9929	99.287	Recessive	-18.5276
1	1.0029	100.287	Recessive	-18.6188
1	1.0129	101.287	Recessive	-13.7423
1	1.0229	102.287	Recessive	-12.8803
1	1.0329	103.287	Recessive	-9.6398
1	1.0429	104.287	Recessive	-13.6532
1	1.0529	105.287	Recessive	-18.7122
1	1.0629	106.287	Recessive	-14.8407
1	1.0729	107.287	Recessive	-18.533
1	1.0829	108.287	Recessive	-14.2541
1	1.0929	109.287	Recessive	-18.6985
1	1.1029	110.287	Recessive	-17.3887
1	1.1129	111.287	Recessive	-12.3599
1	1.1229	112.287	Recessive	-15.4174
1	1.1329	113.287	Recessive	-10.8611
1	1.1429	114.287	Recessive	-8.3319
1	1.1529	115.287	Recessive	-11.5171
1	1.1629	116.287	Recessive	-13.7909
1	1.1729	117.287	Recessive	-14.0991
1	1.1829	118.287	Recessive	-11.8364
1	1.1929	119.287	Recessive	-6.9331
1	1.2029	120.287	Recessive	-17.5931
1	1.2129	121.287	Recessive	-14.1357
1	1.2229	122.287	Recessive	-17.5182
1	1.2329	123.287	Recessive	-10.6172
1	1.2429	124.287	Recessive	-17.3321
1	1.2529	125.287	Recessive	-11.0989
1	1.2629	126.287	Recessive	-9.0653
1	1.2729	127.287	Recessive	-11.7374
1	1.2829	128.287	Recessive	-8.7123
1	1.2929	129.287	Recessive	-15.105
1	1.3029	130.287	Recessive	-16.2433
1	1.3129	131.287	Recessive	-15.3737
1	1.3229	132.287	Recessive	-17.0447
1	1.3329	133.287	Recessive	-9.1491
1	1.3429	134.287	Recessive	-18.4094
1	1.3529	135.287	Recessive	-5.7037
1	1.3629	136.287	Recessive	-7.4388
1	1.3729	137.287	Recessive	-17.5848
1	1.3829	138.287	Recessive	-14.1421
1	1.3929	139.287	Recessive	-17.9219
1	1.4029	140.287	Recessive	-17.2015
1	1.4129	141.287	Recessive	-9.4899
1	1.4229	142.287	Recessive	-15.1514
1	1.4329	143.287	Recessive	-9.2936
1	1.4429	144.287	Recessive	-16.3032
1	1.4529	145.287	Recessive	-18.3315
1	1.4629	146.287	Recessive	-14.8891
1	1.4729	147.287	Recessive	-6.2953
1	1.4829	148.287	Recessive	-7.082
1	1.4929	149.287	Recessive	-7.9888
1	1.5029	150.287	Recessive	-13.2644
1	1.5129	151.287	Recessive	-12.6859
1	1.5229	152.287	Recessive	-16.9005
1	1.5329	153.287	Recessive	-12.9084
1	1.5429	154.287	Recessive	-14.4688
1	1.5529	155.287	Recessive	-15.0249
1	1.5629	156.287	Recessive	-18.2198
1	1.5729	157.287	Recessive	-12.383
1	1.5829	158.287	Recessive	-13.0176
1	1.5929	159.287	Recessive	-11.9706
1	1.6029	160.287	Recessive	-4.8727
1	1.6129	161.287	Recessive	-5.6486
1	1.6229	162.287	Recessive	-5.8543
1	1.6329	163.287	Recessive	-3.6841
1	1.6429	164.287	Recessive	-9.9886
1	1.6529	165.287	Recessive	-3.1716
1	1.6629	166.287	Recessive	-6.0239
1	1.6729	167.287	Recessive	-7.6736
1	1.6829	168.287	Recessive	-2.3108
1	1.6929	169.287	Recessive	-11.5135
1	1.7029	170.287	Recessive	-9.8101
1	1.7129	171.287	Recessive	-1.9785
1	1.7229	172.287	Recessive	-14.6454
1	1.7329	173.287	Recessive	-13.2285
1	1.7429	174.287	Recessive	-2.0553
1	1.7529	175.287	Recessive	-2.7725
1	1.7629	176.287	Recessive	-3.9779
1	1.7729	177.287	Recessive	-4.3689
1	1.7829	178.287	Recessive	-2.4479
1	1.7929	179.287	Recessive	-8.885
1	1.8029	180.287	Recessive	-10.3643
1	1.8129	181.287	Recessive	-12.3303
1	1.8229	182.287	Recessive	-2.93
1	1.8329	183.287	Recessive	-5.1776
1	1.8429	184.287	Recessive	-10.5903
1	1.8529	185.287	Recessive	-13.5716
1	1.8629	186.287	Recessive	-5.7126
1	1.8729	187.287	Recessive	-14.6158
1	1.8829	188.287	Recessive	-14.7558
1	1.8929	189.287	Recessive	-6.6251
1	1.9029	190.287	Recessive	-15.91
1	1.9129	191.287	Recessive	-11.3112
1	1.9229	192.287	Recessive	-8.7064
1	1.9329	193.287	Recessive	-13.1734
1	1.9429	194.287	Recessive	-14.7324
1	1.9529	195.287	Recessive	-7.2635
1	1.9629	196.287	Recessive	-13.865
1	1.9729	197.287	Recessive	-8.3657
1	1.9829	198.287	Recessive	-11.3439
1	1.9929	199.287	Recessive	-11.1128
1	2.0029	200.287	Recessive	-11.7487
1	2.0129	201.287	Recessive	-13.5661
1	2.0229	202.287	Recessive	-10.8079
1	2.0329	203.287	Recessive	-15.8869
1	2.0429	204.287	Recessive	-15.8859
1	2.0529	205.287	Recessive	-18.3292
1	2.0629	206.287	Recessive	-5.7997
1	2.0729	207.287	Recessive	-8.7789
1	2.0829	208.287	Recessive	-8.1906
1	2.0929	209.287	Recessive	-8.9738
1	2.1029	210.287	Recessive	-11.1775
1	2.1129	211.287	Recessive	-10.87
1	2.1229	212.287	Recessive	-12.4382
1	2.1329	213.287	Recessive	-11.6614
1	2.1429	214.287	Recessive	-12.1502
1	2.1529	215.287	Recessive	-13.5097
1	2.1629	216.287	Recessive	-15.5063
1	2.1729	217.287	Recessive	-13.5458
1	2.1829	218.287	Recessive	-10.115
1	2.1929	219.287	Recessive	-16.9856
1	2.2029	220.287	Recessive	-12.1326
1	2.2129	221.287	Recessive	-7.6178
1	2.2229	222.287	Recessive	-10.1005
1	2.2329	223.287	Recessive	-11.0893
1	2.2429	224.287	Recessive	-11.4572
1	2.2529	225.287	Recessive	-12.6386
1	2.2629	226.287	Recessive	-15.8639
1	2.2729	227.287	Recessive	-13.2529
1	2.2829	228.287	Recessive	-18.6407
1	2.2929	229.287	Recessive	-14.4825
1	2.3029	230.287	Recessive	-11.6509
1	2.3129	231.287	Recessive	-14.2323
1	2.3229	232.287	Recessive	-16.2141
1	2.3329	233.287	Recessive	-18.3995
1	2.3429	234.287	Recessive	-13.8728
1	2.3529	235.287	Recessive	-3.6951
1	2.3629	236.287	Recessive	-12.9153
1	2.3729	237.287	Recessive	-16.7525
1	2.3829	238.287	Recessive	-9.1697
1	2.3929	239.287	Recessive	-12.1403
1	2.4029	240.287	Recessive	-11.315
1	2.4129	241.287	Recessive	-14.7883
1	2.4229	242.287	Recessive	-17.3057
1	2.4329	243.287	Recessive	-6.4173
1	2.4429	244.287	Recessive	-10.126
1	2.4529	245.287	Recessive	-18.4903
1	2.4629	246.287	Recessive	-16.295
1	2.4729	247.287	Recessive	-18.399
1	2.4829	248.287	Recessive	-16.9805
1	2.4929	249.287	Recessive	-17.55
1	2.5029	250.287	Recessive	-15.91
1	2.5129	251.287	Recessive	-13.6495
1	2.5229	252.287	Recessive	-13.7429
1	2.5329	253.287	Recessive	-15.947
1	2.5429	254.287	Recessive	-15.2614
1	2.5529	255.287	Recessive	-15.4905
1	2.5629	256.287	Recessive	-13.0711
1	2.5729	257.287	Recessive	-12.3483
1	2.5829	258.287	Recessive	-11.2406
1	2.5929	259.287	Recessive	-9.7809
1	2.6029	260.287	Recessive	-18.531
1	2.6129	261.287	Recessive	-16.5727
1	2.6229	262.287	Recessive	-15.0824
1	2.6329	263.287	Recessive	-17.7918
1	2.6429	264.287	Recessive	-17.3623
1	2.6529	265.287	Recessive	-13.6188
1	2.6629	266.287	Recessive	-13.765
1	2.6729	267.287	Recessive	-15.1852
1	2.6829	268.287	Recessive	-17.7305
1	2.6929	269.287	Recessive	-14.3558
1	2.7029	270.287	Recessive	-8.4906
1	2.7129	271.287	Recessive	-9.2633
1	2.7229	272.287	Recessive	-10.524
1	2.7329	273.287	Recessive	-9.2988
1	2.7429	274.287	Recessive	-11.0729
1	2.7529	275.287	Recessive	-11.6847
1	2.7629	276.287	Recessive	-13.3812
1	2.7729	277.287	Recessive	-18.0966
1	2.7829	278.287	Recessive	-14.0134
1	2.7929	279.287	Recessive	-18.5588
1	2.8029	280.287	Recessive	-18.4404
1	2.8129	281.287	Recessive	-13.6166
1	2.8229	282.287	Recessive	-10.6079
1	2.8329	283.287	Recessive	-10.4347
1	2.8429	284.287	Recessive	-9.6539
1	2.8529	285.287	Recessive	-18.6427
1	2.8629	286.287	Recessive	-8.1045
1	2.8729	287.287	Recessive	-13.3814
1	2.8829	288.287	Recessive	-18.0103
1	2.8929	289.287	Recessive	-8.6482
1	2.9029	290.287	Recessive	-8.3838
1	2.9129	291.287	Recessive	-11.0564
1	2.9229	292.287	Recessive	-11.6741
1	2.9329	293.287	Recessive	-10.4302
1	2.9429	294.287	Recessive	-18.6955
1	2.9529	295.287	Recessive	-13.519
1	2.9629	296.287	Recessive	-10.3803
1	2.9729	297.287	Recessive	-11.934
1	2.9829	298.287	Recessive	-8.0298
1	2.9929	299.287	Recessive	-8.3027
1	3.0029	300.287	Recessive	-7.6208
1	3.0129	301.287	Recessive	-11.7198
1	3.0229	302.287	Recessive	-11.9727
1	3.0329	303.287	Recessive	-7.1857
1	3.0429	304.287	Recessive	-11.961
1	3.0529	305.287	Recessive	-4.2061
1	3.0629	306.287	Recessive	-15.7879
1	3.0729	307.287	Recessive	-11.6085
1	3.0829	308.287	Recessive	-14.3881
1	3.0929	309.287	Recessive	-2.9778
1	3.1029	310.287	Recessive	-4.3036
1	3.1129	311.287	Recessive	-13.5952
1	3.1229	312.287	Recessive	-8.7843
1	3.1329	313.287	Recessive	-7.4791
1	3.1429	314.287	Recessive	-4.3506
1	3.1529	315.287	Recessive	-3.3502
2	0.0002	0.016	Recessive	-5.6249
2	0.0102	1.016	Recessive	-10.6989
2	0.0202	2.016	Recessive	-18.7086
2	0.0302	3.016	Recessive	-13.5878
2	0.0402	4.016	Recessive	-12.0149
2	0.0502	5.016	Recessive	-15.5105
2	0.0602	6.016	Recessive	-18.3957
2	0.0702	7.016	Recessive	-15.7506
2	0.0802	8.016	Recessive	-16.1033
2	0.0902	9.016	Recessive	-18.6072
2	0.1002	10.016	Recessive	-18.6419
2	0.1102	11.016	Recessive	-18.488
2	0.1202	12.016	Recessive	-15.7847
2	0.1302	13.016	Recessive	-14.6392
2	0.1402	14.016	Recessive	-10.2612
2	0.1502	15.016	Recessive	-10.7353
2	0.1602	16.016	Recessive	-15.1379
2	0.1702	17.016	Recessive	-15.8235
2	0.1802	18.016	Recessive	-16.6979
2	0.1902	19.016	Recessive	-18.4803
2	0.2002	20.016	Recessive	-18.2945
2	0.2102	21.016	Recessive	-18.7171
2	0.2202	22.016	Recessive	-14.5181
2	0.2302	23.016	Recessive	-18.5875
2	0.2402	24.016	Recessive	-17.3495
2	0.2502	25.016	Recessive	-18.6671
2	0.2602	26.016	Recessive	-15.2852
2	0.2702	27.016	Recessive	-13.5632
2	0.2802	28.016	Recessive	-17.1143
2	0.2902	29.016	Recessive	-17.9051
2	0.3002	30.016	Recessive	-11.3456
2	0.3102	31.016	Recessive	-10.8495
2	0.3202	32.016	Recessive	-15.3106
2	0.3302	33.016	Recessive	-16.0099
2	0.3402	34.016	Recessive	-16.3036
2	0.3502	35.016	Recessive	-14.8349
2	0.3602	36.016	Recessive	-17.2475
2	0.3702	37.016	Recessive	-12.7428
2	0.3802	38.016	Recessive	-18.1421
2	0.3902	39.016	Recessive	-16.4031
2	0.4002	40.016	Recessive	-17.0644
2	0.4102	41.016	Recessive	-18.7154
2	0.4202	42.016	Recessive	-18.4808
2	0.4302	43.016	Recessive	-16.8167
2	0.4402	44.016	Recessive	-15.1711
2	0.4502	45.016	Recessive	-18.6864
2	0.4602	46.016	Recessive	-17.4793
2	0.4702	47.016	Recessive	-17.1323
2	0.4802	48.016	Recessive	-16.7422
2	0.4902	49.016	Recessive	-16.2148
2	0.5002	50.016	Recessive	-18.4231
2	0.5102	51.016	Recessive	-18.6939
2	0.5202	52.016	Recessive	-13.1562
2	0.5302	53.016	Recessive	-9.3524
2	0.5402	54.016	Recessive	-8.4456
2	0.5502	55.016	Recessive	-8.2398
2	0.5602	56.016	Recessive	-8.606
2	0.5702	57.016	Recessive	-12.9984
2	0.5802	58.016	Recessive	-9.6665
2	0.5902	59.016	Recessive	-11.9273
2	0.6002	60.016	Recessive	-15.5056
2	0.6102	61.016	Recessive	-12.6329
2	0.6202	62.016	Recessive	-12.1464
2	0.6302	63.016	Recessive	-12.6968
2	0.6402	64.016	Recessive	-13.5209
2	0.6502	65.016	Recessive	-10.4258
2	0.6602	66.016	Recessive	-9.5701
2	0.6702	67.016	Recessive	-9.6935
2	0.6802	68.016	Recessive	-11.0302
2	0.6902	69.016	Recessive	-12.7966
2	0.7002	70.016	Recessive	-12.0097
2	0.7102	71.016	Recessive	-9.0997
2	0.7202	72.016	Recessive	-9.0575
2	0.7302	73.016	Recessive	-13.5468
2	0.7402	74.016	Recessive	-10.9083
2	0.7502	75.016	Recessive	-5.9525
2	0.7602	76.016	Recessive	-4.8772
2	0.7702	77.016	Recessive	-4.9342
2	0.7802	78.016	Recessive	-5.0704
2	0.7902	79.016	Recessive	-4.4218
2	0.8002	80.016	Recessive	-5.5065
2	0.8102	81.016	Recessive	-8.5004
2	0.8202	82.016	Recessive	-12.8974
2	0.8302	83.016	Recessive	-6.1229
2	0.8402	84.016	Recessive	-10.6973
2	0.8502	85.016	Recessive	-4.1546
2	0.8602	86.016	Recessive	-6.6707
2	0.8702	87.016	Recessive	-3.869
2	0.8802	88.016	Recessive	-2.859
2	0.8902	89.016	Recessive	-3.506
2	0.9002	90.016	Recessive	-3.5962
2	0.9102	91.016	Recessive	-3.4612
2	0.9202	92.016	Recessive	-5.1575
2	0.9302	93.016	Recessive	-4.3519
2	0.9402	94.016	Recessive	-4.2808
2	0.9502	95.016	Recessive	-1.534
2	0.9602	96.016	Recessive	-1.9476
2	0.9702	97.016	Recessive	-7.7161
2	0.9802	98.016	Recessive	-8.2366
2	0.9902	99.016	Recessive	-4.2322
2	1.0002	100.016	Recessive	-2.162
2	1.0102	101.016	Recessive	-2.4905
2	1.0202	102.016	Recessive	-2.5316
2	1.0302	103.016	Recessive	-3.1202
2	1.0402	104.016	Recessive	-1.6503
2	1.0502	105.016	Recessive	-4.7999
2	1.0602	106.016	Recessive	-5.5908
2	1.0702	107.016	Recessive	-3.0083
2	1.0802	108.016	Recessive	-7.5199
2	1.0902	109.016	Recessive	-7.4344
2	1.1002	110.016	Recessive	-5.7906
2	1.1102	111.016	Recessive	-7.7163
2	1.1202	112.016	Recessive	-7.5971
2	1.1302	113.016	Recessive	-5.2414
2	1.1402	114.016	Recessive	-0.5589
2	1.1502	115.016	Recessive	-7.7086
2	1.1602	116.016	Recessive	-7.4232
2	1.1702	117.016	Recessive	-7.7163
2	1.1802	118.016	Recessive	-7.7164
2	1.1902	119.016	Recessive	-7.717
2	1.2002	120.016	Recessive	-7.717
2	1.2102	121.016	Recessive	-7.6916
2	1.2202	122.016	Recessive	-7.717
2	1.2302	123.016	Recessive	-7.7149
2	1.2402	124.016	Recessive	-7.5778
2	1.2502	125.016	Recessive	-7.6986
2	1.2602	126.016	Recessive	-7.717
2	1.2702	127.016	Recessive	-7.7137
2	1.2802	128.016	Recessive	-6.0506
2	1.2902	129.016	Recessive	-5.2149
2	1.3002	130.016	Recessive	-6.2533
2	1.3102	131.016	Recessive	-4.8911
2	1.3202	132.016	Recessive	-5.036
2	1.3302	133.016	Recessive	-12.9329
2	1.3402	134.016	Recessive	-10.175
2	1.3502	135.016	Recessive	-10.244
2	1.3602	136.016	Recessive	-9.0374
2	1.3702	137.016	Recessive	-10.3726
2	1.3802	138.016	Recessive	-12.019
2	1.3902	139.016	Recessive	-17.6271
2	1.4002	140.016	Recessive	-18.7154
2	1.4102	141.016	Recessive	-18.7165
2	1.4202	142.016	Recessive	-14.5578
2	1.4302	143.016	Recessive	-16.0881
2	1.4402	144.016	Recessive	-8.1206
2	1.4502	145.016	Recessive	-18.7139
2	1.4602	146.016	Recessive	-12.0573
2	1.4702	147.016	Recessive	-17.2625
2	1.4802	148.016	Recessive	-13.9627
2	1.4902	149.016	Recessive	-13.9631
2	1.5002	150.016	Recessive	-13.7866
2	1.5102	151.016	Recessive	-13.2739
2	1.5202	152.016	Recessive	-14.0715
2	1.5302	153.016	Recessive	-18.715
2	1.5402	154.016	Recessive	-16.4469
2	1.5502	155.016	Recessive	-18.6824
2	1.5602	156.016	Recessive	-12.5232
2	1.5702	157.016	Recessive	-15.9895
2	1.5802	158.016	Recessive	-18.7153
2	1.5902	159.016	Recessive	-8.2408
2	1.6002	160.016	Recessive	-3.7587
2	1.6102	161.016	Recessive	-5.5419
2	1.6202	162.016	Recessive	-8.0019
2	1.6302	163.016	Recessive	-4.8975
3	0.0007	0.073	Recessive	-4.7967
3	0.0107	1.073	Recessive	-6.0081
3	0.0207	2.073	Recessive	-9.4642
3	0.0307	3.073	Recessive	-18.6766
3	0.0407	4.073	Recessive	-18.7003
3	0.0507	5.073	Recessive	-18.2864
3	0.0607	6.073	Recessive	-15.2114
3	0.0707	7.073	Recessive	-7.4857
3	0.0807	8.073	Recessive	-9.2415
3	0.0907	9.073	Recessive	-10.1092
3	0.1007	10.073	Recessive	-6.4871
3	0.1107	11.073	Recessive	-18.3613
3	0.1207	12.073	Recessive	-13.3396
3	0.1307	13.073	Recessive	-14.148
3	0.1407	14.073	Recessive	-9.8402
3	0.1507	15.073	Recessive	-7.2109
3	0.1607	16.073	Recessive	-16.7412
3	0.1707	17.073	Recessive	-8.5101
3	0.1807	18.073	Recessive	-12.6115
3	0.1907	19.073	Recessive	-9.1816
3	0.2007	20.073	Recessive	-7.9909
3	0.2107	21.073	Recessive	-14.2023
3	0.2207	22.073	Recessive	-8.9767
3	0.2307	23.073	Recessive	-8.7512
3	0.2407	24.073	Recessive	-12.5832
3	0.2507	25.073	Recessive	-10.3746
3	0.2607	26.073	Recessive	-12.6542
3	0.2707	27.073	Recessive	-14.1606
3	0.2807	28.073	Recessive	-12.6909
3	0.2907	29.073	Recessive	-13.3013
3	0.3007	30.073	Recessive	-11.2638
3	0.3107	31.073	Recessive	-13.5492
3	0.3207	32.073	Recessive	-13.9984
3	0.3307	33.073	Recessive	-18.1603
3	0.3407	34.073	Recessive	-9.7082
3	0.3507	35.073	Recessive	-4.8312
3	0.3607	36.073	Recessive	-5.7056
3	0.3707	37.073	Recessive	-12.3837
3	0.3807	38.073	Recessive	-10.1734
3	0.3907	39.073	Recessive	-5.5317
3	0.4007	40.073	Recessive	-4.934
3	0.4107	41.073	Recessive	-4.7455
3	0.4207	42.073	Recessive	-4.782
3	0.4307	43.073	Recessive	-5.0245
3	0.4407	44.073	Recessive	-5.5566
3	0.4507	45.073	Recessive	-6.7753
3	0.4607	46.073	Recessive	-2.3462
3	0.4707	47.073	Recessive	-2.4587
3	0.4807	48.073	Recessive	-3.3482
3	0.4907	49.073	Recessive	-13.7972
3	0.5007	50.073	Recessive	-6.3529
3	0.5107	51.073	Recessive	-11.5653
3	0.5207	52.073	Recessive	-10.6085
3	0.5307	53.073	Recessive	-14.4028
3	0.5407	54.073	Recessive	-11.1767
3	0.5507	55.073	Recessive	-11.2428
3	0.5607	56.073	Recessive	-13.7394
3	0.5707	57.073	Recessive	-10.9197
3	0.5807	58.073	Recessive	-12.4876
3	0.5907	59.073	Recessive	-9.4994
3	0.6007	60.073	Recessive	-2.2046
3	0.6107	61.073	Recessive	-12.4583
3	0.6207	62.073	Recessive	-3.1743
3	0.6307	63.073	Recessive	-11.3132
3	0.6407	64.073	Recessive	-10.3909
3	0.6507	65.073	Recessive	-9.2915
3	0.6607	66.073	Recessive	-14.4199
3	0.6707	67.073	Recessive	-14.1618
3	0.6807	68.073	Recessive	-2.8896
3	0.6907	69.073	Recessive	-11.4307
3	0.7007	70.073	Recessive	-10.0859
3	0.7107	71.073	Recessive	-8.8002
3	0.7207	72.073	Recessive	-2.2505
3	0.7307	73.073	Recessive	-12.3334
3	0.7407	74.073	Recessive	-9.6378
3	0.7507	75.073	Recessive	-13.6648
3	0.7607	76.073	Recessive	-5.3457
3	0.7707	77.073	Recessive	-0.8699
3	0.7807	78.073	Recessive	-12.4903
3	0.7907	79.073	Recessive	-3.0522
3	0.8007	80.073	Recessive	-12.2731
3	0.8107	81.073	Recessive	-5.9716
3	0.8207	82.073	Recessive	0.298
3	0.8307	83.073	Recessive	-5.1101
3	0.8407	84.073	Recessive	-6.1034
3	0.8507	85.073	Recessive	-4.6746
3	0.8607	86.073	Recessive	-2.9982
3	0.8707	87.073	Recessive	1.4624
3	0.8807	88.073	Recessive	0.2104
3	0.8907	89.073	Recessive	-7.4977
3	0.9007	90.073	Recessive	-4.3357
3	0.9107	91.073	Recessive	-9.8218
3	0.9207	92.073	Recessive	-5.7749
3	0.9307	93.073	Recessive	-3.4266
3	0.9407	94.073	Recessive	-2.8546
3	0.9507	95.073	Recessive	-7.2358
3	0.9607	96.073	Recessive	-4.1437
3	0.9707	97.073	Recessive	-5.3478
3	0.9807	98.073	Recessive	-5.8157
3	0.9907	99.073	Recessive	-12.6259
3	1.0007	100.073	Recessive	-9.7432
3	1.0107	101.073	Recessive	-10.495
3	1.0207	102.073	Recessive	-14.0461
3	1.0307	103.073	Recessive	-18.588
3	1.0407	104.073	Recessive	-18.6159
3	1.0507	105.073	Recessive	-12.9822
3	1.0607	106.073	Recessive	-13.1263
3	1.0707	107.073	Recessive	-13.4374
3	1.0807	108.073	Recessive	-12.7991
3	1.0907	109.073	Recessive	-11.4408
3	1.1007	110.073	Recessive	-13.2178
3	1.1107	111.073	Recessive	-12.2777
3	1.1207	112.073	Recessive	-13.0627
3	1.1307	113.073	Recessive	-14.4219
3	1.1407	114.073	Recessive	-14.285
3	1.1507	115.073	Recessive	-18.4574
3	1.1607	116.073	Recessive	-14.4296
3	1.1707	117.073	Recessive	-18.6454
3	1.1807	118.073	Recessive	-14.3779
3	1.1907	119.073	Recessive	-17.1108
3	1.2007	120.073	Recessive	-18.0507
3	1.2107	121.073	Recessive	-8.458
3	1.2207	122.073	Recessive	-14.5887
3	1.2307	123.073	Recessive	-14.4937
3	1.2407	124.073	Recessive	-12.554
3	1.2507	125.073	Recessive	-17.2444
3	1.2607	126.073	Recessive	-15.0962
3	1.2707	127.073	Recessive	-12.7592
3	1.2807	128.073	Recessive	-9.1302
3	1.2907	129.073	Recessive	-10.6853
3	1.3007	130.073	Recessive	-16.539
3	1.3107	131.073	Recessive	-14.097
3	1.3207	132.073	Recessive	-13.3471
3	1.3307	133.073	Recessive	-11.5495
3	1.3407	134.073	Recessive	-18.5294
3	1.3507	135.073	Recessive	-18.6432
3	1.3607	136.073	Recessive	-14.8261
3	1.3707	137.073	Recessive	-12.783
3	1.3807	138.073	Recessive	-12.6187
3	1.3907	139.073	Recessive	-14.1323
3	1.4007	140.073	Recessive	-12.6221
3	1.4107	141.073	Recessive	-13.9447
3	1.4207	142.073	Recessive	-9.2507
3	1.4307	143.073	Recessive	-9.478
3	1.4407	144.073	Recessive	-17.5006
3	1.4507	145.073	Recessive	-8.1568
4	0.001	0.095	Recessive	-4.5189
4	0.011	1.095	Recessive	-6.9711
4	0.021	2.095	Recessive	-11.8924
4	0.031	3.095	Recessive	-13.999
4	0.041	4.095	Recessive	-13.1112
4	0.051	5.095	Recessive	-9.1788
4	0.061	6.095	Recessive	-13.4277
4	0.071	7.095	Recessive	-9.2401
4	0.081	8.095	Recessive	-8.7036
4	0.091	9.095	Recessive	-11.4637
4	0.101	10.095	Recessive	-13.7639
4	0.111	11.095	Recessive	-7.7081
4	0.121	12.095	Recessive	0.9477
4	0.131	13.095	Recessive	1.2752
4	0.141	14.095	Recessive	1.2206
4	0.151	15.095	Recessive	-4.1254
4	0.161	16.095	Recessive	2.8051
4	0.171	17.095	Recessive	2.574
4	0.181	18.095	Recessive	-6.9889
4	0.191	19.095	Recessive	-6.4247
4	0.201	20.095	Recessive	-6.5727
4	0.211	21.095	Recessive	-3.2088
4	0.221	22.095	Recessive	-5.4794
4	0.231	23.095	Recessive	-4.8589
4	0.241	24.095	Recessive	-4.6991
4	0.251	25.095	Recessive	-10.6081
4	0.261	26.095	Recessive	-10.4865
4	0.271	27.095	Recessive	-10.1416
4	0.281	28.095	Recessive	-10.5622
4	0.291	29.095	Recessive	-3.4626
4	0.301	30.095	Recessive	-5.3146
4	0.311	31.095	Recessive	-0.396
4	0.321	32.095	Recessive	-0.4131
4	0.331	33.095	Recessive	-5.6308
4	0.341	34.095	Recessive	-8.7868
4	0.351	35.095	Recessive	-4.6455
4	0.361	36.095	Recessive	-6.2356
4	0.371	37.095	Recessive	-8.4516
4	0.381	38.095	Recessive	-10.048
4	0.391	39.095	Recessive	-13.0872
4	0.401	40.095	Recessive	-10.4347
4	0.411	41.095	Recessive	-9.0789
4	0.421	42.095	Recessive	-9.337
4	0.431	43.095	Recessive	-9.4498
4	0.441	44.095	Recessive	-11.6654
4	0.451	45.095	Recessive	-13.1361
4	0.461	46.095	Recessive	-14.4885
4	0.471	47.095	Recessive	-15.35
4	0.481	48.095	Recessive	-14.9239
4	0.491	49.095	Recessive	-11.8085
4	0.501	50.095	Recessive	-9.9001
4	0.511	51.095	Recessive	-9.0832
4	0.521	52.095	Recessive	-9.2239
4	0.531	53.095	Recessive	-10.3148
4	0.541	54.095	Recessive	-15.7992
4	0.551	55.095	Recessive	-15.1902
4	0.561	56.095	Recessive	-14.9166
4	0.571	57.095	Recessive	-13.9779
4	0.581	58.095	Recessive	-14.4466
4	0.591	59.095	Recessive	-14.9306
4	0.601	60.095	Recessive	-16.86
4	0.611	61.095	Recessive	-15.5538
4	0.621	62.095	Recessive	-17.2833
4	0.631	63.095	Recessive	-15.3814
4	0.641	64.095	Recessive	-18.3045
4	0.651	65.095	Recessive	-18.7174
4	0.661	66.095	Recessive	-18.6599
4	0.671	67.095	Recessive	-18.7174
4	0.681	68.095	Recessive	-17.432
4	0.691	69.095	Recessive	-18.7132
4	0.701	70.095	Recessive	-18.7106
4	0.711	71.095	Recessive	-17.772
4	0.721	72.095	Recessive	-18.569
4	0.731	73.095	Recessive	-15.3854
4	0.741	74.095	Recessive	-15.9414
4	0.751	75.095	Recessive	-12.2627
4	0.761	76.095	Recessive	-15.4613
4	0.771	77.095	Recessive	-18.6811
4	0.781	78.095	Recessive	-18.4207
4	0.791	79.095	Recessive	-12.1259
4	0.801	80.095	Recessive	-11.2386
4	0.811	81.095	Recessive	-12.2153
4	0.821	82.095	Recessive	-12.1924
4	0.831	83.095	Recessive	-12.3401
4	0.841	84.095	Recessive	-13.0086
4	0.851	85.095	Recessive	-5.1967
4	0.861	86.095	Recessive	-11.525
4	0.871	87.095	Recessive	-10.082
4	0.881	88.095	Recessive	-12.1024
4	0.891	89.095	Recessive	-14.0802
4	0.901	90.095	Recessive	-14.9409
4	0.911	91.095	Recessive	-10.076
4	0.921	92.095	Recessive	-8.9102
4	0.931	93.095	Recessive	-8.3572
4	0.941	94.095	Recessive	-13.405
4	0.951	95.095	Recessive	-15.2281
4	0.961	96.095	Recessive	-5.0827
4	0.971	97.095	Recessive	-14.7619
4	0.981	98.095	Recessive	-14.2592
4	0.991	99.095	Recessive	-7.2617
4	1.001	100.095	Recessive	-7.0772
4	1.011	101.095	Recessive	-11.118
4	1.021	102.095	Recessive	-11.2864
4	1.031	103.095	Recessive	-11.5244
4	1.041	104.095	Recessive	-2.6256
4	1.051	105.095	Recessive	-7.2157
4	1.061	106.095	Recessive	-3.3904
4	1.071	107.095	Recessive	-7.7783
4	1.081	108.095	Recessive	-9.7481
4	1.091	109.095	Recessive	-6.6491
4	1.101	110.095	Recessive	-8.5517
4	1.111	111.095	Recessive	-7.8916
4	1.121	112.095	Recessive	-4.0842
4	1.131	113.095	Recessive	-14.2938
4	1.141	114.095	Recessive	-11.4516
4	1.151	115.095	Recessive	-4.0815
4	1.161	116.095	Recessive	-8.2931
4	1.171	117.095	Recessive	-8.484
4	1.181	118.095	Recessive	-10.1438
4	1.191	119.095	Recessive	-6.6102
4	1.201	120.095	Recessive	-3.3906
4	1.211	121.095	Recessive	-6.381
4	1.221	122.095	Recessive	-9.3613
4	1.231	123.095	Recessive	-12.956
4	1.241	124.095	Recessive	-5.8053
4	1.251	125.095	Recessive	-3.8293
4	1.261	126.095	Recessive	-12.5652
4	1.271	127.095	Recessive	-12.2612
4	1.281	128.095	Recessive	-5.4878
4	1.291	129.095	Recessive	-0.5578
4	1.301	130.095	Recessive	-12.4848
4	1.311	131.095	Recessive	-6.5068
4	1.321	132.095	Recessive	-10.3188
4	1.331	133.095	Recessive	-12.1281
4	1.341	134.095	Recessive	-16.4433
4	1.351	135.095	Recessive	-16.955
4	1.361	136.095	Recessive	-16.9479
4	1.371	137.095	Recessive	-13.5356
4	1.381	138.095	Recessive	-12.8582
4	1.391	139.095	Recessive	-12.1001
4	1.401	140.095	Recessive	-12.0266
4	1.411	141.095	Recessive	-11.5695
4	1.421	142.095	Recessive	-11.4246
4	1.431	143.095	Recessive	-11.2533
4	1.441	144.095	Recessive	-4.5634
5	0.0014	0.144	Recessive	-5.1242
5	0.0114	1.144	Recessive	-11.3529
5	0.0214	2.144	Recessive	-11.1571
5	0.0314	3.144	Recessive	-12.2793
5	0.0414	4.144	Recessive	-18.6257
5	0.0514	5.144	Recessive	-15.1008
5	0.0614	6.144	Recessive	-15.3465
5	0.0714	7.144	Recessive	-17.6528
5	0.0814	8.144	Recessive	-18.7066
5	0.0914	9.144	Recessive	-18.5997
5	0.1014	10.144	Recessive	-13.1937
5	0.1114	11.144	Recessive	-14.4558
5	0.1214	12.144	Recessive	-18.642
5	0.1314	13.144	Recessive	-15.1321
5	0.1414	14.144	Recessive	-13.7751
5	0.1514	15.144	Recessive	-12.7832
5	0.1614	16.144	Recessive	-16.2645
5	0.1714	17.144	Recessive	-18.0921
5	0.1814	18.144	Recessive	-12.0054
5	0.1914	19.144	Recessive	-14.2261
5	0.2014	20.144	Recessive	-17.389
5	0.2114	21.144	Recessive	-14.3938
5	0.2214	22.144	Recessive	-14.1041
5	0.2314	23.144	Recessive	-11.9876
5	0.2414	24.144	Recessive	-11.2795
5	0.2514	25.144	Recessive	-8.6191
5	0.2614	26.144	Recessive	-7.4844
5	0.2714	27.144	Recessive	-7.2821
5	0.2814	28.144	Recessive	-7.5696
5	0.2914	29.144	Recessive	-8.8647
5	0.3014	30.144	Recessive	-13.3714
5	0.3114	31.144	Recessive	-11.9589
5	0.3214	32.144	Recessive	-12.9974
5	0.3314	33.144	Recessive	-14.4075
5	0.3414	34.144	Recessive	-14.8654
5	0.3514	35.144	Recessive	-13.2415
5	0.3614	36.144	Recessive	-9.8412
5	0.3714	37.144	Recessive	-10.88
5	0.3814	38.144	Recessive	-11.4253
5	0.3914	39.144	Recessive	-12.3526
5	0.4014	40.144	Recessive	-16.8471
5	0.4114	41.144	Recessive	-12.1607
5	0.4214	42.144	Recessive	-12.6925
5	0.4314	43.144	Recessive	-10.7298
5	0.4414	44.144	Recessive	-10.1052
5	0.4514	45.144	Recessive	-10.244
5	0.4614	46.144	Recessive	-11.3865
5	0.4714	47.144	Recessive	-7.079
5	0.4814	48.144	Recessive	-6.9024
5	0.4914	49.144	Recessive	-14.7913
5	0.5014	50.144	Recessive	-12.4841
5	0.5114	51.144	Recessive	-12.1464
5	0.5214	52.144	Recessive	-5.5369
5	0.5314	53.144	Recessive	-4.48
5	0.5414	54.144	Recessive	-2.9743
5	0.5514	55.144	Recessive	-15.8859
5	0.5614	56.144	Recessive	-11.0812
5	0.5714	57.144	Recessive	-13.4902
5	0.5814	58.144	Recessive	-18.5891
5	0.5914	59.144	Recessive	-12.4923
5	0.6014	60.144	Recessive	-15.025
5	0.6114	61.144	Recessive	-12.2904
5	0.6214	62.144	Recessive	-9.8222
5	0.6314	63.144	Recessive	-8.3651
5	0.6414	64.144	Recessive	-9.6125
5	0.6514	65.144	Recessive	-14.0916
5	0.6614	66.144	Recessive	-7.9632
5	0.6714	67.144	Recessive	-8.7297
5	0.6814	68.144	Recessive	-18.7158
5	0.6914	69.144	Recessive	-18.6842
5	0.7014	70.144	Recessive	-18.6166
5	0.7114	71.144	Recessive	-18.3524
5	0.7214	72.144	Recessive	-17.5952
5	0.7314	73.144	Recessive	-16.8498
5	0.7414	74.144	Recessive	-17.6484
5	0.7514	75.144	Recessive	-17.9669
5	0.7614	76.144	Recessive	-18.5861
5	0.7714	77.144	Recessive	-13.1172
5	0.7814	78.144	Recessive	-15.8148
5	0.7914	79.144	Recessive	-13.1537
5	0.8014	80.144	Recessive	-18.7173
5	0.8114	81.144	Recessive	-18.7173
5	0.8214	82.144	Recessive	-17.8816
5	0.8314	83.144	Recessive	-18.5199
5	0.8414	84.144	Recessive	-18.2184
5	0.8514	85.144	Recessive	-18.1944
5	0.8614	86.144	Recessive	-18.6105
5	0.8714	87.144	Recessive	-13.1232
5	0.8814	88.144	Recessive	-14.0389
5	0.8914	89.144	Recessive	-18.6684
5	0.9014	90.144	Recessive	-14.5523
5	0.9114	91.144	Recessive	-18.3295
5	0.9214	92.144	Recessive	-17.2473
5	0.9314	93.144	Recessive	-18.1287
5	0.9414	94.144	Recessive	-14.5026
5	0.9514	95.144	Recessive	-7.9336
5	0.9614	96.144	Recessive	-18.7126
5	0.9714	97.144	Recessive	-18.2729
5	0.9814	98.144	Recessive	-18.4127
5	0.9914	99.144	Recessive	-17.2923
5	1.0014	100.144	Recessive	-18.7017
5	1.0114	101.144	Recessive	-18.4836
5	1.0214	102.144	Recessive	-18.4073
5	1.0314	103.144	Recessive	-16.2218
5	1.0414	104.144	Recessive	-18.5201
5	1.0514	105.144	Recessive	-16.9095
5	1.0614	106.144	Recessive	-16.0648
5	1.0714	107.144	Recessive	-16.1633
5	1.0814	108.144	Recessive	-11.8185
5	1.0914	109.144	Recessive	-9.7043
5	1.1014	110.144	Recessive	-11.0777
5	1.1114	111.144	Recessive	-3.9519
5	1.1214	112.144	Recessive	-2.9042
6	0.0001	0.013	Recessive	-10.0877
6	0.0101	1.013	Recessive	-11.8513
6	0.0201	2.013	Recessive	-11.9624
6	0.0301	3.013	Recessive	-18.7139
6	0.0401	4.013	Recessive	-14.2819
6	0.0501	5.013	Recessive	-13.174
6	0.0601	6.013	Recessive	-15.0298
6	0.0701	7.013	Recessive	-18.7133
6	0.0801	8.013	Recessive	-15.4312
6	0.0901	9.013	Recessive	-13.72
6	0.1001	10.013	Recessive	-14.8067
6	0.1101	11.013	Recessive	-18.4015
6	0.1201	12.013	Recessive	-18.0015
6	0.1301	13.013	Recessive	-18.1503
6	0.1401	14.013	Recessive	-10.3511
6	0.1501	15.013	Recessive	-11.6967
6	0.1601	16.013	Recessive	-18.4347
6	0.1701	17.013	Recessive	-11.4736
6	0.1801	18.013	Recessive	-16.094
6	0.1901	19.013	Recessive	-18.1318
6	0.2001	20.013	Recessive	-18.2785
6	0.2101	21.013	Recessive	-14.9984
6	0.2201	22.013	Recessive	-18.6917
6	0.2301	23.013	Recessive	-10.4953
6	0.2401	24.013	Recessive	-18.1663
6	0.2501	25.013	Recessive	-15.1939
6	0.2601	26.013	Recessive	-14.2451
6	0.2701	27.013	Recessive	-14.4778
6	0.2801	28.013	Recessive	-8.2083
6	0.2901	29.013	Recessive	-18.3914
6	0.3001	30.013	Recessive	-18.666
6	0.3101	31.013	Recessive	-17.8258
6	0.3201	32.013	Recessive	-16.0097
6	0.3301	33.013	Recessive	-11.0147
6	0.3401	34.013	Recessive	-12.0513
6	0.3501	35.013	Recessive	-12.494
6	0.3601	36.013	Recessive	-13.4
6	0.3701	37.013	Recessive	-18.7115
6	0.3801	38.013	Recessive	-11.2847
6	0.3901	39.013	Recessive	-10.6984
6	0.4001	40.013	Recessive	-8.1552
6	0.4101	41.013	Recessive	-8.4221
6	0.4201	42.013	Recessive	-5.4554
6	0.4301	43.013	Recessive	-4.4289
6	0.4401	44.013	Recessive	-3.9334
6	0.4501	45.013	Recessive	-3.695
6	0.4601	46.013	Recessive	-3.8349
6	0.4701	47.013	Recessive	-5.3993
6	0.4801	48.013	Recessive	-3.6586
6	0.4901	49.013	Recessive	-3.4655
6	0.5001	50.013	Recessive	-4.3804
6	0.5101	51.013	Recessive	-3.818
6	0.5201	52.013	Recessive	-4.9222
6	0.5301	53.013	Recessive	-3.1237
6	0.5401	54.013	Recessive	-2.9943
6	0.5501	55.013	Recessive	-3.3027
6	0.5601	56.013	Recessive	-3.7207
6	0.5701	57.013	Recessive	-3.0787
6	0.5801	58.013	Recessive	-3.2168
6	0.5901	59.013	Recessive	-4.0923
6	0.6001	60.013	Recessive	-6.6
6	0.6101	61.013	Recessive	-10.5595
6	0.6201	62.013	Recessive	-10.2328
6	0.6301	63.013	Recessive	-12.4075
6	0.6401	64.013	Recessive	-13.6775
6	0.6501	65.013	Recessive	-13.315
6	0.6601	66.013	Recessive	-12.9785
6	0.6701	67.013	Recessive	-13.1817
6	0.6801	68.013	Recessive	-12.997
6	0.6901	69.013	Recessive	-10.9775
6	0.7001	70.013	Recessive	-10.1808
6	0.7101	71.013	Recessive	-11.0656
6	0.7201	72.013	Recessive	-11.4136
6	0.7301	73.013	Recessive	-11.8559
6	0.7401	74.013	Recessive	-18.0374
6	0.7501	75.013	Recessive	-11.6479
6	0.7601	76.013	Recessive	-11.4538
6	0.7701	77.013	Recessive	-5.892
6	0.7801	78.013	Recessive	-6.7564
6	0.7901	79.013	Recessive	-10.1187
6	0.8001	80.013	Recessive	-9.7838
6	0.8101	81.013	Recessive	-8.5894
6	0.8201	82.013	Recessive	-7.2677
6	0.8301	83.013	Recessive	-7.0197
6	0.8401	84.013	Recessive	-8.0772
6	0.8501	85.013	Recessive	-7.8782
6	0.8601	86.013	Recessive	-18.6915
6	0.8701	87.013	Recessive	-16.2465
6	0.8801	88.013	Recessive	-17.7586
6	0.8901	89.013	Recessive	-16.1494
6	0.9001	90.013	Recessive	-15.8417
6	0.9101	91.013	Recessive	-17.6338
6	0.9201	92.013	Recessive	-16.4317
6	0.9301	93.013	Recessive	-16.0135
6	0.9401	94.013	Recessive	-17.2258
6	0.9501	95.013	Recessive	-14.854
6	0.9601	96.013	Recessive	-15.3198
6	0.9701	97.013	Recessive	-11.6481
6	0.9801	98.013	Recessive	-11.3721
6	0.9901	99.013	Recessive	-14.4104
6	1.0001	100.013	Recessive	-17.8449
6	1.0101	101.013	Recessive	-15.5655
6	1.0201	102.013	Recessive	-15.9176
6	1.0301	103.013	Recessive	-16.0053
6	1.0401	104.013	Recessive	-15.7108
6	1.0501	105.013	Recessive	-15.8307
6	1.0601	106.013	Recessive	-7.1327
6	1.0701	107.013	Recessive	-7.2933
6	1.0801	108.013	Recessive	-13.7641
6	1.0901	109.013	Recessive	-7.2708
6	1.1001	110.013	Recessive	-10.0115
6	1.1101	111.013	Recessive	-15.1192
6	1.1201	112.013	Recessive	-18.4623
6	1.1301	113.013	Recessive	-14.9051
6	1.1401	114.013	Recessive	-18.3427
6	1.1501	115.013	Recessive	-11.3676
6	1.1601	116.013	Recessive	-17.8539
6	1.1701	117.013	Recessive	-12.4268
6	1.1801	118.013	Recessive	-18.7101
6	1.1901	119.013	Recessive	-14.8407
6	1.2001	120.013	Recessive	-10.6985
6	1.2101	121.013	Recessive	-12.6472
6	1.2201	122.013	Recessive	-15.8782
6	1.2301	123.013	Recessive	-14.1966
6	1.2401	124.013	Recessive	-8.663
6	1.2501	125.013	Recessive	-15.4664
6	1.2601	126.013	Recessive	-10.0318
6	1.2701	127.013	Recessive	-9.054
6	1.2801	128.013	Recessive	-9.8329
6	1.2901	129.013	Recessive	-8.2153
6	1.3001	130.013	Recessive	-9.0715
6	1.3101	131.013	Recessive	-11.142
6	1.3201	132.013	Recessive	-11.1663
6	1.3301	133.013	Recessive	-7.331
6	1.3401	134.013	Recessive	-9.1984
6	1.3501	135.013	Recessive	-6.9231
6	1.3601	136.013	Recessive	-10.6008
6	1.3701	137.013	Recessive	-10.4493
6	1.3801	138.013	Recessive	-12.0982
6	1.3901	139.013	Recessive	-9.7546
6	1.4001	140.013	Recessive	-7.3414
6	1.4101	141.013	Recessive	-10.0344
6	1.4201	142.013	Recessive	-4.9697
6	1.4301	143.013	Recessive	-9.304
6	1.4401	144.013	Recessive	-8.4032
6	1.4501	145.013	Recessive	-11.9299
6	1.4601	146.013	Recessive	-12.127
6	1.4701	147.013	Recessive	-12.489
6	1.4801	148.013	Recessive	-13.2039
6	1.4901	149.013	Recessive	-16.0685
6	1.5001	150.013	Recessive	-18.7166
6	1.5101	151.013	Recessive	-18.5106
6	1.5201	152.013	Recessive	-17.7912
6	1.5301	153.013	Recessive	-16.7669
6	1.5401	154.013	Recessive	-17.6199
6	1.5501	155.013	Recessive	-16.389
6	1.5601	156.013	Recessive	-15.7869
6	1.5701	157.013	Recessive	-18.6164
6	1.5801	158.013	Recessive	-1.033
7	0.0005	0.049	Recessive	-18.7168
7	0.0105	1.049	Recessive	-16.2696
7	0.0205	2.049	Recessive	-18.5217
7	0.0305	3.049	Recessive	-16.411
7	0.0405	4.049	Recessive	-16.7657
7	0.0505	5.049	Recessive	-15.0157
7	0.0605	6.049	Recessive	-17.9061
7	0.0705	7.049	Recessive	-10.5976
7	0.0805	8.049	Recessive	-6.6317
7	0.0905	9.049	Recessive	-9.242
7	0.1005	10.049	Recessive	-16.0254
7	0.1105	11.049	Recessive	-3.3506
7	0.1205	12.049	Recessive	-15.1129
7	0.1305	13.049	Recessive	-16.3842
7	0.1405	14.049	Recessive	-17.5732
7	0.1505	15.049	Recessive	-17.0186
7	0.1605	16.049	Recessive	-18.2419
7	0.1705	17.049	Recessive	-18.7165
7	0.1805	18.049	Recessive	-18.6978
7	0.1905	19.049	Recessive	-17.3094
7	0.2005	20.049	Recessive	-16.9762
7	0.2105	21.049	Recessive	-18.7162
7	0.2205	22.049	Recessive	-18.4319
7	0.2305	23.049	Recessive	-17.3319
7	0.2405	24.049	Recessive	-16.3757
7	0.2505	25.049	Recessive	-15.9591
7	0.2605	26.049	Recessive	-15.7591
7	0.2705	27.049	Recessive	-18.7161
7	0.2805	28.049	Recessive	-18.5766
7	0.2905	29.049	Recessive	-18.7134
7	0.3005	30.049	Recessive	-18.7082
7	0.3105	31.049	Recessive	-18.5476
7	0.3205	32.049	Recessive	-18.3692
7	0.3305	33.049	Recessive	-17.1197
7	0.3405	34.049	Recessive	-17.7867
7	0.3505	35.049	Recessive	-13.2316
7	0.3605	36.049	Recessive	-16.9861
7	0.3705	37.049	Recessive	-16.0952
7	0.3805	38.049	Recessive	-16.7882
7	0.3905	39.049	Recessive	-14.7328
7	0.4005	40.049	Recessive	-16.7594
7	0.4105	41.049	Recessive	-17.2639
7	0.4205	42.049	Recessive	-13.7176
7	0.4305	43.049	Recessive	-13.2137
7	0.4405	44.049	Recessive	-14.6997
7	0.4505	45.049	Recessive	-14.4879
7	0.4605	46.049	Recessive	-8.4246
7	0.4705	47.049	Recessive	-16.3204
7	0.4805	48.049	Recessive	-10.7638
7	0.4905	49.049	Recessive	-9.0837
7	0.5005	50.049	Recessive	-16.4972
7	0.5105	51.049	Recessive	-11.6593
7	0.5205	52.049	Recessive	-18.7011
7	0.5305	53.049	Recessive	-17.6937
7	0.5405	54.049	Recessive	-18.4073
7	0.5505	55.049	Recessive	-16.8344
7	0.5605	56.049	Recessive	-18.0183
7	0.5705	57.049	Recessive	-12.834
7	0.5805	58.049	Recessive	-6.7772
7	0.5905	59.049	Recessive	-14.2211
7	0.6005	60.049	Recessive	-8.766
7	0.6105	61.049	Recessive	-5.846
7	0.6205	62.049	Recessive	-2.6694
7	0.6305	63.049	Recessive	-3.127
7	0.6405	64.049	Recessive	-1.9499
7	0.6505	65.049	Recessive	-3.8566
7	0.6605	66.049	Recessive	-2.3959
7	0.6705	67.049	Recessive	-2.2873
7	0.6805	68.049	Recessive	-3.3637
7	0.6905	69.049	Recessive	-6.3467
7	0.7005	70.049	Recessive	-8.248
7	0.7105	71.049	Recessive	-12.9172
7	0.7205	72.049	Recessive	-13.2535
7	0.7305	73.049	Recessive	-9.9555
7	0.7405	74.049	Recessive	-12.9279
7	0.7505	75.049	Recessive	-18.5069
7	0.7605	76.049	Recessive	-8.1739
7	0.7705	77.049	Recessive	-13.2517
7	0.7805	78.049	Recessive	-12.2271
7	0.7905	79.049	Recessive	-6.2072
7	0.8005	80.049	Recessive	-6.5487
7	0.8105	81.049	Recessive	-15.9119
7	0.8205	82.049	Recessive	-11.0597
7	0.8305	83.049	Recessive	-18.6381
7	0.8405	84.049	Recessive	-14.3721
7	0.8505	85.049	Recessive	-12.5661
7	0.8605	86.049	Recessive	-14.7695
7	0.8705	87.049	Recessive	-18.7074
7	0.8805	88.049	Recessive	-17.9014
7	0.8905	89.049	Recessive	-15.3345
7	0.9005	90.049	Recessive	-18.604
7	0.9105	91.049	Recessive	-15.1963
7	0.9205	92.049	Recessive	-17.768
7	0.9305	93.049	Recessive	-15.5909
7	0.9405	94.049	Recessive	-17.2664
7	0.9505	95.049	Recessive	-16.8023
7	0.9605	96.049	Recessive	-16.9697
7	0.9705	97.049	Recessive	-15.3222
7	0.9805	98.049	Recessive	-16.3009
7	0.9905	99.049	Recessive	-16.8067
7	1.0005	100.049	Recessive	-17.3528
7	1.0105	101.049	Recessive	-15.3242
7	1.0205	102.049	Recessive	-13.0516
7	1.0305	103.049	Recessive	-13.1748
7	1.0405	104.049	Recessive	-13.961
7	1.0505	105.049	Recessive	-16.9946
7	1.0605	106.049	Recessive	-12.2892
7	1.0705	107.049	Recessive	-14.7499
7	1.0805	108.049	Recessive	-13.7801
7	1.0905	109.049	Recessive	-17.4125
7	1.1005	110.049	Recessive	-10.641
7	1.1105	111.049	Recessive	-14.8928
7	1.1205	112.049	Recessive	-18.2286
7	1.1305	113.049	Recessive	-14.7152
7	1.1405	114.049	Recessive	-18.6898
7	1.1505	115.049	Recessive	-14.4418
7	1.1605	116.049	Recessive	-14.9691
7	1.1705	117.049	Recessive	-17.9978
7	1.1805	118.049	Recessive	-6.1965
7	1.1905	119.049	Recessive	-11.3219
7	1.2005	120.049	Recessive	-11.7783
7	1.2105	121.049	Recessive	-4.5884
7	1.2205	122.049	Recessive	-9.812
7	1.2305	123.049	Recessive	-3.4192
7	1.2405	124.049	Recessive	-10.9645
7	1.2505	125.049	Recessive	-13.4119
7	1.2605	126.049	Recessive	-14.8167
7	1.2705	127.049	Recessive	-16.6543
7	1.2805	128.049	Recessive	-16.8236
7	1.2905	129.049	Recessive	-14.5138
7	1.3005	130.049	Recessive	-18.6648
7	1.3105	131.049	Recessive	-15.499
7	1.3205	132.049	Recessive	-11.6787
7	1.3305	133.049	Recessive	-11.7274
7	1.3405	134.049	Recessive	-10.2092
7	1.3505	135.049	Recessive	-6.9674
8	0.0042	0.425	Recessive	-5.5289
8	0.0142	1.425	Recessive	-17.9207
8	0.0242	2.425	Recessive	-16.9382
8	0.0342	3.425	Recessive	-18.6127
8	0.0442	4.425	Recessive	-18.7172
8	0.0542	5.425	Recessive	-18.7174
8	0.0642	6.425	Recessive	-18.7174
8	0.0742	7.425	Recessive	-18.4881
8	0.0842	8.425	Recessive	-4.8917
8	0.0942	9.425	Recessive	-17.2244
8	0.1042	10.425	Recessive	-17.8504
8	0.1142	11.425	Recessive	-11.8619
8	0.1242	12.425	Recessive	-14.7158
8	0.1342	13.425	Recessive	-10.3872
8	0.1442	14.425	Recessive	-13.8461
8	0.1542	15.425	Recessive	-11.108
8	0.1642	16.425	Recessive	-9.7819
8	0.1742	17.425	Recessive	-3.6407
8	0.1842	18.425	Recessive	-3.4908
8	0.1942	19.425	Recessive	-15.6441
8	0.2042	20.425	Recessive	-9.8156
8	0.2142	21.425	Recessive	-9.9147
8	0.2242	22.425	Recessive	-9.2383
8	0.2342	23.425	Recessive	-5.9938
8	0.2442	24.425	Recessive	-6.8573
8	0.2542	25.425	Recessive	-5.2895
8	0.2642	26.425	Recessive	-5.1471
8	0.2742	27.425	Recessive	-6.3054
8	0.2842	28.425	Recessive	-6.425
8	0.2942	29.425	Recessive	-6.6981
8	0.3042	30.425	Recessive	-10.4066
8	0.3142	31.425	Recessive	-18.6422
8	0.3242	32.425	Recessive	-10.9476
8	0.3342	33.425	Recessive	-9.8403
8	0.3442	34.425	Recessive	-10.0795
8	0.3542	35.425	Recessive	-18.2254
8	0.3642	36.425	Recessive	-9.1832
8	0.3742	37.425	Recessive	-10.6425
8	0.3842	38.425	Recessive	-10.3717
8	0.3942	39.425	Recessive	-8.6088
8	0.4042	40.425	Recessive	-16.518
8	0.4142	41.425	Recessive	-12.009
8	0.4242	42.425	Recessive	-13.0188
8	0.4342	43.425	Recessive	-14.461
8	0.4442	44.425	Recessive	-6.9407
8	0.4542	45.425	Recessive	-8.0997
8	0.4642	46.425	Recessive	-8.4842
8	0.4742	47.425	Recessive	-8.592
8	0.4842	48.425	Recessive	-9.2864
8	0.4942	49.425	Recessive	-10.5031
8	0.5042	50.425	Recessive	-10.9572
8	0.5142	51.425	Recessive	-11.9599
8	0.5242	52.425	Recessive	-15.487
8	0.5342	53.425	Recessive	-13.2972
8	0.5442	54.425	Recessive	-12.6123
8	0.5542	55.425	Recessive	-13.0301
8	0.5642	56.425	Recessive	-14.3958
8	0.5742	57.425	Recessive	-15.9312
8	0.5842	58.425	Recessive	-9.9744
8	0.5942	59.425	Recessive	-3.7838
8	0.6042	60.425	Recessive	-4.218
8	0.6142	61.425	Recessive	-8.5429
8	0.6242	62.425	Recessive	-6.5779
8	0.6342	63.425	Recessive	-6.3292
8	0.6442	64.425	Recessive	-6.6253
8	0.6542	65.425	Recessive	-7.0043
8	0.6642	66.425	Recessive	-14.1076
8	0.6742	67.425	Recessive	-11.3845
8	0.6842	68.425	Recessive	-12.0558
8	0.6942	69.425	Recessive	-10.0145
8	0.7042	70.425	Recessive	-7.2675
8	0.7142	71.425	Recessive	-8.9126
8	0.7242	72.425	Recessive	-12.2085
8	0.7342	73.425	Recessive	-12.7274
8	0.7442	74.425	Recessive	-12.2724
8	0.7542	75.425	Recessive	-16.9543
8	0.7642	76.425	Recessive	-13.5439
8	0.7742	77.425	Recessive	-12.9857
8	0.7842	78.425	Recessive	-15.9111
8	0.7942	79.425	Recessive	-11.1441
8	0.8042	80.425	Recessive	-14.3597
8	0.8142	81.425	Recessive	-11.9699
8	0.8242	82.425	Recessive	-18.2255
8	0.8342	83.425	Recessive	-12.4508
8	0.8442	84.425	Recessive	-14.5932
8	0.8542	85.425	Recessive	-11.7862
8	0.8642	86.425	Recessive	-10.7979
8	0.8742	87.425	Recessive	-14.7935
8	0.8842	88.425	Recessive	-12.453
8	0.8942	89.425	Recessive	-9.7428
8	0.9042	90.425	Recessive	-11.1056
8	0.9142	91.425	Recessive	-14.5869
8	0.9242	92.425	Recessive	-18.7152
8	0.9342	93.425	Recessive	-13.8358
8	0.9442	94.425	Recessive	-9.8489
8	0.9542	95.425	Recessive	-13.7227
8	0.9642	96.425	Recessive	-8.3282
8	0.9742	97.425	Recessive	-6.5798
8	0.9842	98.425	Recessive	-5.7399
8	0.9942	99.425	Recessive	-5.2459
8	1.0042	100.425	Recessive	-4.9615
8	1.0142	101.425	Recessive	-4.8532
8	1.0242	102.425	Recessive	-4.9615
8	1.0342	103.425	Recessive	-5.5749
8	1.0442	104.425	Recessive	-7.9178
8	1.0542	105.425	Recessive	-7.1501
8	1.0642	106.425	Recessive	-10.4275
8	1.0742	107.425	Recessive	-8.3318
8	1.0842	108.425	Recessive	-8.728
8	1.0942	109.425	Recessive	-13.2632
8	1.1042	110.425	Recessive	-10.1606
8	1.1142	111.425	Recessive	-13.2741
8	1.1242	112.425	Recessive	-9.0291
8	1.1342	113.425	Recessive	-18.2487
8	1.1442	114.425	Recessive	-17.8751
8	1.1542	115.425	Recessive	-12.1202
8	1.1642	116.425	Recessive	-14.1073
8	1.1742	117.425	Recessive	-14.7119
8	1.1842	118.425	Recessive	-15.3871
8	1.1942	119.425	Recessive	-15.6719
8	1.2042	120.425	Recessive	-15.9473
8	1.2142	121.425	Recessive	-18.46
8	1.2242	122.425	Recessive	-15.3558
8	1.2342	123.425	Recessive	-13.1706
8	1.2442	124.425	Recessive	-13.8282
8	1.2542	125.425	Recessive	-10.13
8	1.2642	126.425	Recessive	-17.0451
8	1.2742	127.425	Recessive	-18.6788
8	1.2842	128.425	Recessive	-13.7322
8	1.2942	129.425	Recessive	-18.716
8	1.3042	130.425	Recessive	-18.7174
8	1.3142	131.425	Recessive	-18.3702
8	1.3242	132.425	Recessive	-18.3011
8	1.3342	133.425	Recessive	-17.9824
8	1.3442	134.425	Recessive	-18.7167
8	1.3542	135.425	Recessive	-18.7127
8	1.3642	136.425	Recessive	-18.7174
8	1.3742	137.425	Recessive	-16.9647
8	1.3842	138.425	Recessive	-13.392
8	1.3942	139.425	Recessive	-13.6254
8	1.4042	140.425	Recessive	-18.6497
8	1.4142	141.425	Recessive	-13.6738
8	1.4242	142.425	Recessive	-10.2562
8	1.4342	143.425	Recessive	-16.9175
8	1.4442	144.425	Recessive	-18.6111
8	1.4542	145.425	Recessive	-15.0994
8	1.4642	146.425	Recessive	-18.7134
8	1.4742	147.425	Recessive	-18.0048
8	1.4842	148.425	Recessive	-6.1063
9	0.0002	0.022	Recessive	-6.9442
9	0.0102	1.022	Recessive	-8.5127
9	0.0202	2.022	Recessive	-14.8296
9	0.0302	3.022	Recessive	-7.3031
9	0.0402	4.022	Recessive	-7.8133
9	0.0502	5.022	Recessive	-7.3376
9	0.0602	6.022	Recessive	-7.9972
9	0.0702	7.022	Recessive	-18.7115
9	0.0802	8.022	Recessive	-14.4487
9	0.0902	9.022	Recessive	-12.6181
9	0.1002	10.022	Recessive	-18.5679
9	0.1102	11.022	Recessive	-13.7201
9	0.1202	12.022	Recessive	-12.6068
9	0.1302	13.022	Recessive	-13.7028
9	0.1402	14.022	Recessive	-18.6973
9	0.1502	15.022	Recessive	-14.2718
9	0.1602	16.022	Recessive	-15.9287
9	0.1702	17.022	Recessive	-18.7174
9	0.1802	18.022	Recessive	-15.0807
9	0.1902	19.022	Recessive	-11.1967
9	0.2002	20.022	Recessive	-13.4113
9	0.2102	21.022	Recessive	-13.6894
9	0.2202	22.022	Recessive	-12.4392
9	0.2302	23.022	Recessive	-15.4849
9	0.2402	24.022	Recessive	-14.321
9	0.2502	25.022	Recessive	-16.3006
9	0.2602	26.022	Recessive	-14.5642
9	0.2702	27.022	Recessive	-18.7116
9	0.2802	28.022	Recessive	-18.4161
9	0.2902	29.022	Recessive	-13.4705
9	0.3002	30.022	Recessive	-3.7594
9	0.3102	31.022	Recessive	-3.0513
9	0.3202	32.022	Recessive	-1.4935
9	0.3302	33.022	Recessive	-4.7624
9	0.3402	34.022	Recessive	-4.6777
9	0.3502	35.022	Recessive	0.8321
9	0.3602	36.022	Recessive	-4.2278
9	0.3702	37.022	Recessive	-2.2384
9	0.3802	38.022	Recessive	-4.418
9	0.3902	39.022	Recessive	-4.0552
9	0.4002	40.022	Recessive	1.2816
9	0.4102	41.022	Recessive	-8.3985
9	0.4202	42.022	Recessive	-3.4901
9	0.4302	43.022	Recessive	2.5631
9	0.4402	44.022	Recessive	-2.8464
9	0.4502	45.022	Recessive	-7.6081
9	0.4602	46.022	Recessive	-4.2971
9	0.4702	47.022	Recessive	-3.0951
9	0.4802	48.022	Recessive	-9.7675
9	0.4902	49.022	Recessive	-8.6155
9	0.5002	50.022	Recessive	-13.6323
9	0.5102	51.022	Recessive	-18.1395
9	0.5202	52.022	Recessive	-10.8913
9	0.5302	53.022	Recessive	-4.315
9	0.5402	54.022	Recessive	-8.006
9	0.5502	55.022	Recessive	-9.804
9	0.5602	56.022	Recessive	-6.8973
9	0.5702	57.022	Recessive	-4.8509
9	0.5802	58.022	Recessive	-12.5725
9	0.5902	59.022	Recessive	-5.8288
9	0.6002	60.022	Recessive	-10.984
9	0.6102	61.022	Recessive	-18.4799
9	0.6202	62.022	Recessive	-16.3356
9	0.6302	63.022	Recessive	-12.3856
9	0.6402	64.022	Recessive	-13.2439
9	0.6502	65.022	Recessive	-14.8355
9	0.6602	66.022	Recessive	-14.7452
9	0.6702	67.022	Recessive	-12.4456
9	0.6802	68.022	Recessive	-11.8326
9	0.6902	69.022	Recessive	-11.7552
9	0.7002	70.022	Recessive	-14.9544
9	0.7102	71.022	Recessive	-13.8175
9	0.7202	72.022	Recessive	-9.8972
9	0.7302	73.022	Recessive	-12.4056
9	0.7402	74.022	Recessive	-13.6863
9	0.7502	75.022	Recessive	-12.2633
9	0.7602	76.022	Recessive	-13.922
9	0.7702	77.022	Recessive	-12.1045
9	0.7802	78.022	Recessive	-14.2639
9	0.7902	79.022	Recessive	-12.7282
9	0.8002	80.022	Recessive	-7.7931
9	0.8102	81.022	Recessive	-7.3466
9	0.8202	82.022	Recessive	-8.3736
9	0.8302	83.022	Recessive	-11.5267
9	0.8402	84.022	Recessive	-13.3085
9	0.8502	85.022	Recessive	-11.234
9	0.8602	86.022	Recessive	-13.6225
9	0.8702	87.022	Recessive	-6.1482
9	0.8802	88.022	Recessive	-5.6304
9	0.8902	89.022	Recessive	-5.733
9	0.9002	90.022	Recessive	-6.5226
9	0.9102	91.022	Recessive	-8.5145
9	0.9202	92.022	Recessive	-6.6855
9	0.9302	93.022	Recessive	-6.5502
9	0.9402	94.022	Recessive	-5.6348
9	0.9502	95.022	Recessive	-3.72
9	0.9602	96.022	Recessive	-3.7142
9	0.9702	97.022	Recessive	-7.642
9	0.9802	98.022	Recessive	-12.2024
9	0.9902	99.022	Recessive	-9.9616
9	1.0002	100.022	Recessive	-9.8026
9	1.0102	101.022	Recessive	-13.6326
9	1.0202	102.022	Recessive	-7.3406
9	1.0302	103.022	Recessive	-6.5166
9	1.0402	104.022	Recessive	-6.5244
9	1.0502	105.022	Recessive	-7.8331
9	1.0602	106.022	Recessive	-9.8864
9	1.0702	107.022	Recessive	-9.8607
9	1.0802	108.022	Recessive	-7.2255
9	1.0902	109.022	Recessive	-6.5624
9	1.1002	110.022	Recessive	-6.9289
9	1.1102	111.022	Recessive	-10.5852
9	1.1202	112.022	Recessive	-8.1411
9	1.1302	113.022	Recessive	-13.3795
9	1.1402	114.022	Recessive	-13.2954
9	1.1502	115.022	Recessive	-13.1106
9	1.1602	116.022	Recessive	-11.3518
9	1.1702	117.022	Recessive	-11.0804
9	1.1802	118.022	Recessive	-13.4289
9	1.1902	119.022	Recessive	-14.0126
9	1.2002	120.022	Recessive	-14.5845
9	1.2102	121.022	Recessive	-17.188
9	1.2202	122.022	Recessive	-17.3585
9	1.2302	123.022	Recessive	-18.6562
9	1.2402	124.022	Recessive	-12.9226
9	1.2502	125.022	Recessive	-10.9241
9	1.2602	126.022	Recessive	-12.6513
9	1.2702	127.022	Recessive	-10.3046
9	1.2802	128.022	Recessive	-12.7872
9	1.2902	129.022	Recessive	-11.6617
9	1.3002	130.022	Recessive	-9.6845
9	1.3102	131.022	Recessive	-10.5129
9	1.3202	132.022	Recessive	-12.0813
9	1.3302	133.022	Recessive	-10.8627
9	1.3402	134.022	Recessive	-10.6304
9	1.3502	135.022	Recessive	-12.573
9	1.3602	136.022	Recessive	-11.6113
9	1.3702	137.022	Recessive	-13.1846
9	1.3802	138.022	Recessive	-14.6967
9	1.3902	139.022	Recessive	-18.6922
9	1.4002	140.022	Recessive	-15.3465
9	1.4102	141.022	Recessive	-16.7035
9	1.4202	142.022	Recessive	-18.4012
9	1.4302	143.022	Recessive	-18.196
9	1.4402	144.022	Recessive	-14.5764
9	1.4502	145.022	Recessive	-13.2608
9	1.4602	146.022	Recessive	-15.2577
9	1.4702	147.022	Recessive	-14.6233
9	1.4802	148.022	Recessive	-13.9269
9	1.4902	149.022	Recessive	-14.016
9	1.5002	150.022	Recessive	-16.5529
9	1.5102	151.022	Recessive	-14.665
9	1.5202	152.022	Recessive	-14.6819
9	1.5302	153.022	Recessive	-16.0284
9	1.5402	154.022	Recessive	-7.6698
10	0.0001	0.006	Recessive	-6.8934
10	0.0101	1.006	Recessive	-10.9589
10	0.0201	2.006	Recessive	-16.2615
10	0.0301	3.006	Recessive	-13.8737
10	0.0401	4.006	Recessive	-14.1148
10	0.0501	5.006	Recessive	-18.651
10	0.0601	6.006	Recessive	-18.7096
10	0.0701	7.006	Recessive	-18.715
10	0.0801	8.006	Recessive	-17.7978
10	0.0901	9.006	Recessive	-18.5252
10	0.1001	10.006	Recessive	-16.6184
10	0.1101	11.006	Recessive	-18.2332
10	0.1201	12.006	Recessive	-18.5192
10	0.1301	13.006	Recessive	-14.6752
10	0.1401	14.006	Recessive	-14.0072
10	0.1501	15.006	Recessive	-18.5934
10	0.1601	16.006	Recessive	-18.7164
10	0.1701	17.006	Recessive	-18.6787
10	0.1801	18.006	Recessive	-18.6597
10	0.1901	19.006	Recessive	-15.0651
10	0.2001	20.006	Recessive	-13.3686
10	0.2101	21.006	Recessive	-18.7172
10	0.2201	22.006	Recessive	-14.4055
10	0.2301	23.006	Recessive	-7.6785
10	0.2401	24.006	Recessive	-18.6635
10	0.2501	25.006	Recessive	-17.4681
10	0.2601	26.006	Recessive	-10.6749
10	0.2701	27.006	Recessive	-9.513
10	0.2801	28.006	Recessive	-17.2649
10	0.2901	29.006	Recessive	-9.688
10	0.3001	30.006	Recessive	-8.9212
10	0.3101	31.006	Recessive	-18.2976
10	0.3201	32.006	Recessive	-17.0433
10	0.3301	33.006	Recessive	-13.1263
10	0.3401	34.006	Recessive	-9.664
10	0.3501	35.006	Recessive	-8.8097
10	0.3601	36.006	Recessive	-9.8415
10	0.3701	37.006	Recessive	-17.2323
10	0.3801	38.006	Recessive	-16.5158
10	0.3901	39.006	Recessive	-17.4116
10	0.4001	40.006	Recessive	-15.9735
10	0.4101	41.006	Recessive	-16.9803
10	0.4201	42.006	Recessive	-16.3511
10	0.4301	43.006	Recessive	-18.7138
10	0.4401	44.006	Recessive	-15.9991
10	0.4501	45.006	Recessive	-15.7151
10	0.4601	46.006	Recessive	-15.9655
10	0.4701	47.006	Recessive	-18.6244
10	0.4801	48.006	Recessive	-18.7006
10	0.4901	49.006	Recessive	-17.2051
10	0.5001	50.006	Recessive	-18.7153
10	0.5101	51.006	Recessive	-18.6821
10	0.5201	52.006	Recessive	-18.6217
10	0.5301	53.006	Recessive	-18.3668
10	0.5401	54.006	Recessive	-18.3017
10	0.5501	55.006	Recessive	-18.5982
10	0.5601	56.006	Recessive	-18.696
10	0.5701	57.006	Recessive	-16.7945
10	0.5801	58.006	Recessive	-17.8939
10	0.5901	59.006	Recessive	-16.3098
10	0.6001	60.006	Recessive	-18.1668
10	0.6101	61.006	Recessive	-15.0637
10	0.6201	62.006	Recessive	-8.5254
10	0.6301	63.006	Recessive	-7.2208
10	0.6401	64.006	Recessive	-7.7897
10	0.6501	65.006	Recessive	-7.215
10	0.6601	66.006	Recessive	-8.8519
10	0.6701	67.006	Recessive	-6.8122
10	0.6801	68.006	Recessive	-6.9337
10	0.6901	69.006	Recessive	-17.7133
10	0.7001	70.006	Recessive	-4.5459
10	0.7101	71.006	Recessive	-10.5176
10	0.7201	72.006	Recessive	-7.2067
10	0.7301	73.006	Recessive	-10.3765
10	0.7401	74.006	Recessive	-5.7022
10	0.7501	75.006	Recessive	-4.6677
10	0.7601	76.006	Recessive	-4.8029
10	0.7701	77.006	Recessive	-6.8735
10	0.7801	78.006	Recessive	-2.6818
10	0.7901	79.006	Recessive	-1.2706
11	0.0002	0.022	Recessive	-6.1424
11	0.0102	1.022	Recessive	-12.8001
11	0.0202	2.022	Recessive	-13.3407
11	0.0302	3.022	Recessive	-12.3458
11	0.0402	4.022	Recessive	-16.1379
11	0.0502	5.022	Recessive	-13.1385
11	0.0602	6.022	Recessive	-10.7006
11	0.0702	7.022	Recessive	-13.2676
11	0.0802	8.022	Recessive	-13.6964
11	0.0902	9.022	Recessive	-15.8786
11	0.1002	10.022	Recessive	-7.157
11	0.1102	11.022	Recessive	-10.4316
11	0.1202	12.022	Recessive	-12.653
11	0.1302	13.022	Recessive	-8.1349
11	0.1402	14.022	Recessive	-9.4543
11	0.1502	15.022	Recessive	-11.6761
11	0.1602	16.022	Recessive	-12.0701
11	0.1702	17.022	Recessive	-11.3944
11	0.1802	18.022	Recessive	-9.6435
11	0.1902	19.022	Recessive	-10.0638
11	0.2002	20.022	Recessive	-12.0493
11	0.2102	21.022	Recessive	-11.7028
11	0.2202	22.022	Recessive	-10.6416
11	0.2302	23.022	Recessive	-12.1437
11	0.2402	24.022	Recessive	-12.4595
11	0.2502	25.022	Recessive	-13.9766
11	0.2602	26.022	Recessive	-11.2697
11	0.2702	27.022	Recessive	-9.8528
11	0.2802	28.022	Recessive	-11.8813
11	0.2902	29.022	Recessive	-9.0738
11	0.3002	30.022	Recessive	-6.7605
11	0.3102	31.022	Recessive	-12.362
11	0.3202	32.022	Recessive	-13.6766
11	0.3302	33.022	Recessive	-6.5262
11	0.3402	34.022	Recessive	-13.507
11	0.3502	35.022	Recessive	-14.5342
11	0.3602	36.022	Recessive	-13.9509
11	0.3702	37.022	Recessive	-10.6915
11	0.3802	38.022	Recessive	-9.7345
11	0.3902	39.022	Recessive	-9.7932
11	0.4002	40.022	Recessive	-13.443
11	0.4102	41.022	Recessive	-11.9853
11	0.4202	42.022	Recessive	-9.5715
11	0.4302	43.022	Recessive	-12.8916
11	0.4402	44.022	Recessive	-14.3571
11	0.4502	45.022	Recessive	-11.5715
11	0.4602	46.022	Recessive	-5.2088
11	0.4702	47.022	Recessive	-4.4221
11	0.4802	48.022	Recessive	-10.7113
11	0.4902	49.022	Recessive	-18.3355
11	0.5002	50.022	Recessive	-15.2344
11	0.5102	51.022	Recessive	-16.517
11	0.5202	52.022	Recessive	-14.4497
11	0.5302	53.022	Recessive	-15.3131
11	0.5402	54.022	Recessive	-14.4152
11	0.5502	55.022	Recessive	-6.8628
11	0.5602	56.022	Recessive	-17.9052
11	0.5702	57.022	Recessive	-15.9749
11	0.5802	58.022	Recessive	-10.7716
11	0.5902	59.022	Recessive	-9.3962
11	0.6002	60.022	Recessive	-11.9888
11	0.6102	61.022	Recessive	-10.9189
11	0.6202	62.022	Recessive	-17.6019
11	0.6302	63.022	Recessive	-3.8326
11	0.6402	64.022	Recessive	-10.176
11	0.6502	65.022	Recessive	-5.1521
11	0.6602	66.022	Recessive	-10.8122
11	0.6702	67.022	Recessive	-16.8433
11	0.6802	68.022	Recessive	-12.632
11	0.6902	69.022	Recessive	-14.7824
11	0.7002	70.022	Recessive	-12.3943
11	0.7102	71.022	Recessive	-15.586
11	0.7202	72.022	Recessive	-16.8797
11	0.7302	73.022	Recessive	-14.587
11	0.7402	74.022	Recessive	-17.9532
11	0.7502	75.022	Recessive	-17.3213
11	0.7602	76.022	Recessive	-10.8613
11	0.7702	77.022	Recessive	-11.7273
11	0.7802	78.022	Recessive	-12.2339
11	0.7902	79.022	Recessive	-13.8493
11	0.8002	80.022	Recessive	-8.9187
11	0.8102	81.022	Recessive	-7.7173
11	0.8202	82.022	Recessive	-7.5694
11	0.8302	83.022	Recessive	-7.7028
11	0.8402	84.022	Recessive	-6.6452
11	0.8502	85.022	Recessive	-13.6444
11	0.8602	86.022	Recessive	-11.1757
11	0.8702	87.022	Recessive	-8.3502
11	0.8802	88.022	Recessive	-3.941
12	0.0008	0.08	Recessive	-5.0347
12	0.0108	1.08	Recessive	-4.6488
12	0.0208	2.08	Recessive	-4.0786
12	0.0308	3.08	Recessive	0.2851
12	0.0408	4.08	Recessive	-6.8438
12	0.0508	5.08	Recessive	-3.6469
12	0.0608	6.08	Recessive	-1.9214
12	0.0708	7.08	Recessive	-5.9779
12	0.0808	8.08	Recessive	-0.5011
12	0.0908	9.08	Recessive	-18.4801
12	0.1008	10.08	Recessive	-12.8076
12	0.1108	11.08	Recessive	-11.6343
12	0.1208	12.08	Recessive	-16.7865
12	0.1308	13.08	Recessive	-13.3719
12	0.1408	14.08	Recessive	-12.8644
12	0.1508	15.08	Recessive	-18.67
12	0.1608	16.08	Recessive	-18.5032
12	0.1708	17.08	Recessive	-17.2715
12	0.1808	18.08	Recessive	-17.8717
12	0.1908	19.08	Recessive	-17.9546
12	0.2008	20.08	Recessive	-17.7625
12	0.2108	21.08	Recessive	-17.2653
12	0.2208	22.08	Recessive	-6.4619
12	0.2308	23.08	Recessive	-9.8611
12	0.2408	24.08	Recessive	-6.3221
12	0.2508	25.08	Recessive	-17.2413
12	0.2608	26.08	Recessive	-13.4586
12	0.2708	27.08	Recessive	-17.3252
12	0.2808	28.08	Recessive	-18.4814
12	0.2908	29.08	Recessive	-18.7095
12	0.3008	30.08	Recessive	-14.631
12	0.3108	31.08	Recessive	-18.2457
12	0.3208	32.08	Recessive	-16.438
12	0.3308	33.08	Recessive	-16.3468
12	0.3408	34.08	Recessive	-18.6097
12	0.3508	35.08	Recessive	-18.055
12	0.3608	36.08	Recessive	-18.6933
12	0.3708	37.08	Recessive	-17.5098
12	0.3808	38.08	Recessive	-18.7169
12	0.3908	39.08	Recessive	-18.7139
12	0.4008	40.08	Recessive	-18.7159
12	0.4108	41.08	Recessive	-15.2176
12	0.4208	42.08	Recessive	-17.6345
12	0.4308	43.08	Recessive	-18.7168
12	0.4408	44.08	Recessive	-15.2098
12	0.4508	45.08	Recessive	-9.7483
12	0.4608	46.08	Recessive	-13.3976
12	0.4708	47.08	Recessive	-12.8575
12	0.4808	48.08	Recessive	-11.3118
12	0.4908	49.08	Recessive	-11.4264
12	0.5008	50.08	Recessive	-13.0205
12	0.5108	51.08	Recessive	-11.4567
12	0.5208	52.08	Recessive	-12.1121
12	0.5308	53.08	Recessive	-12.0576
12	0.5408	54.08	Recessive	-11.7721
12	0.5508	55.08	Recessive	-11.6673
12	0.5608	56.08	Recessive	-10.479
12	0.5708	57.08	Recessive	-12.2474
12	0.5808	58.08	Recessive	-8.2243
12	0.5908	59.08	Recessive	-7.4161
12	0.6008	60.08	Recessive	-15.9163
12	0.6108	61.08	Recessive	-9.5241
12	0.6208	62.08	Recessive	-9.2943
12	0.6308	63.08	Recessive	-17.4358
12	0.6408	64.08	Recessive	-2.5402
13	0.0009	0.089	Recessive	-8.8548
13	0.0109	1.089	Recessive	-15.0578
13	0.0209	2.089	Recessive	-18.5412
13	0.0309	3.089	Recessive	-15.2898
13	0.0409	4.089	Recessive	-11.019
13	0.0509	5.089	Recessive	-17.3479
13	0.0609	6.089	Recessive	-13.146
13	0.0709	7.089	Recessive	-13.7774
13	0.0809	8.089	Recessive	-12.9838
13	0.0909	9.089	Recessive	-14.423
13	0.1009	10.089	Recessive	-15.1577
13	0.1109	11.089	Recessive	-17.8506
13	0.1209	12.089	Recessive	-16.6759
13	0.1309	13.089	Recessive	-14.1774
13	0.1409	14.089	Recessive	-16.0055
13	0.1509	15.089	Recessive	-7.2899
13	0.1609	16.089	Recessive	-5.0528
13	0.1709	17.089	Recessive	-10.3336
13	0.1809	18.089	Recessive	-11.5836
13	0.1909	19.089	Recessive	-9.7761
13	0.2009	20.089	Recessive	-6.2221
13	0.2109	21.089	Recessive	-9.7668
13	0.2209	22.089	Recessive	-8.8148
13	0.2309	23.089	Recessive	-8.6594
13	0.2409	24.089	Recessive	-8.5932
13	0.2509	25.089	Recessive	-5.5498
13	0.2609	26.089	Recessive	-6.5433
13	0.2709	27.089	Recessive	-11.8758
13	0.2809	28.089	Recessive	-8.712
13	0.2909	29.089	Recessive	-12.0201
13	0.3009	30.089	Recessive	-6.3062
13	0.3109	31.089	Recessive	-12.9819
13	0.3209	32.089	Recessive	-5.2929
13	0.3309	33.089	Recessive	-14.691
13	0.3409	34.089	Recessive	-13.7524
13	0.3509	35.089	Recessive	-9.1222
13	0.3609	36.089	Recessive	-4.3484
13	0.3709	37.089	Recessive	-4.5575
13	0.3809	38.089	Recessive	-11.2277
13	0.3909	39.089	Recessive	-15.6117
13	0.4009	40.089	Recessive	-16.2708
13	0.4109	41.089	Recessive	-12.892
13	0.4209	42.089	Recessive	-11.1784
13	0.4309	43.089	Recessive	-13.342
13	0.4409	44.089	Recessive	-11.8436
13	0.4509	45.089	Recessive	-10.2398
13	0.4609	46.089	Recessive	-11.9816
13	0.4709	47.089	Recessive	-10.3687
13	0.4809	48.089	Recessive	-15.3438
13	0.4909	49.089	Recessive	-12.9621
13	0.5009	50.089	Recessive	-12.1016
13	0.5109	51.089	Recessive	-10.5116
13	0.5209	52.089	Recessive	-8.7619
13	0.5309	53.089	Recessive	-14.6844
13	0.5409	54.089	Recessive	-12.9678
13	0.5509	55.089	Recessive	-10.2054
13	0.5609	56.089	Recessive	-7.8535
13	0.5709	57.089	Recessive	-8.6866
13	0.5809	58.089	Recessive	-11.9621
13	0.5909	59.089	Recessive	-12.9879
13	0.6009	60.089	Recessive	-11.4623
13	0.6109	61.089	Recessive	-5.4085
13	0.6209	62.089	Recessive	-8.5042
13	0.6309	63.089	Recessive	-10.8699
13	0.6409	64.089	Recessive	-12.6666
13	0.6509	65.089	Recessive	-5.5937
13	0.6609	66.089	Recessive	-6.6827
13	0.6709	67.089	Recessive	-7.6688
13	0.6809	68.089	Recessive	-8.4463
13	0.6909	69.089	Recessive	-7.5983
13	0.7009	70.089	Recessive	-6.7942
13	0.7109	71.089	Recessive	-12.8634
13	0.7209	72.089	Recessive	-12.6608
13	0.7309	73.089	Recessive	-13.5705
13	0.7409	74.089	Recessive	-12.4727
13	0.7509	75.089	Recessive	-10.2159
13	0.7609	76.089	Recessive	-8.231
13	0.7709	77.089	Recessive	-10.8844
13	0.7809	78.089	Recessive	-12.3552
13	0.7909	79.089	Recessive	-7.5858
13	0.8009	80.089	Recessive	-10.0811
13	0.8109	81.089	Recessive	-6.1231
13	0.8209	82.089	Recessive	-12.6483
13	0.8309	83.089	Recessive	-12.9621
13	0.8409	84.089	Recessive	-8.5264
13	0.8509	85.089	Recessive	-5.8635
13	0.8609	86.089	Recessive	-5.7197
13	0.8709	87.089	Recessive	-5.1546
13	0.8809	88.089	Recessive	-6.8797
13	0.8909	89.089	Recessive	-10.0948
13	0.9009	90.089	Recessive	-8.4149
13	0.9109	91.089	Recessive	-18.6437
13	0.9209	92.089	Recessive	-13.5764
13	0.9309	93.089	Recessive	-13.9084
13	0.9409	94.089	Recessive	-14.3041
13	0.9509	95.089	Recessive	-11.1418
13	0.9609	96.089	Recessive	-13.1913
13	0.9709	97.089	Recessive	-11.8359
13	0.9809	98.089	Recessive	-12.9776
13	0.9909	99.089	Recessive	-12.2062
13	1.0009	100.089	Recessive	-10.9278
13	1.0109	101.089	Recessive	-10.8558
13	1.0209	102.089	Recessive	-12.0198
13	1.0309	103.089	Recessive	-12.7824
13	1.0409	104.089	Recessive	-15.6721
13	1.0509	105.089	Recessive	-16.69
13	1.0609	106.089	Recessive	-9.2128
13	1.0709	107.089	Recessive	-7.0905
13	1.0809	108.089	Recessive	-10.0987
13	1.0909	109.089	Recessive	-9.2546
13	1.1009	110.089	Recessive	-9.4583
13	1.1109	111.089	Recessive	-10.7315
13	1.1209	112.089	Recessive	-18.6755
13	1.1309	113.089	Recessive	-5.5906
13	1.1409	114.089	Recessive	-5.751
13	1.1509	115.089	Recessive	-9.1441
13	1.1609	116.089	Recessive	-5.6096
13	1.1709	117.089	Recessive	-3.0775
13	1.1809	118.089	Recessive	-12.5458
13	1.1909	119.089	Recessive	-9.1213
13	1.2009	120.089	Recessive	-11.6332
13	1.2109	121.089	Recessive	-11.599
13	1.2209	122.089	Recessive	-10.8653
13	1.2309	123.089	Recessive	-9.2731
13	1.2409	124.089	Recessive	-10.3582
13	1.2509	125.089	Recessive	-18.5605
13	1.2609	126.089	Recessive	-12.35
13	1.2709	127.089	Recessive	-10.4638
13	1.2809	128.089	Recessive	-10.6123
13	1.2909	129.089	Recessive	-13.508
13	1.3009	130.089	Recessive	-12.8481
13	1.3109	131.089	Recessive	-16.2004
13	1.3209	132.089	Recessive	-17.1849
13	1.3309	133.089	Recessive	-14.3512
13	1.3409	134.089	Recessive	-13.0989
13	1.3509	135.089	Recessive	-13.0316
13	1.3609	136.089	Recessive	-10.8644
13	1.3709	137.089	Recessive	-10.9155
13	1.3809	138.089	Recessive	-14.1119
13	1.3909	139.089	Recessive	-11.7286
13	1.4009	140.089	Recessive	-16.0682
13	1.4109	141.089	Recessive	-14.0433
13	1.4209	142.089	Recessive	-12.3939
13	1.4309	143.089	Recessive	-11.3705
13	1.4409	144.089	Recessive	-15.0686
13	1.4509	145.089	Recessive	-18.7013
13	1.4609	146.089	Recessive	-9.2674
13	1.4709	147.089	Recessive	-9.2497
13	1.4809	148.089	Recessive	-13.0551
13	1.4909	149.089	Recessive	-13.3081
13	1.5009	150.089	Recessive	-13.3053
13	1.5109	151.089	Recessive	-14.8202
13	1.5209	152.089	Recessive	-16.1203
13	1.5309	153.089	Recessive	-13.1292
13	1.5409	154.089	Recessive	-18.7065
13	1.5509	155.089	Recessive	-13.3641
13	1.5609	156.089	Recessive	-11.8102
13	1.5709	157.089	Recessive	-14.7321
13	1.5809	158.089	Recessive	-14.1052
13	1.5909	159.089	Recessive	-15.2565
13	1.6009	160.089	Recessive	-17.8237
13	1.6109	161.089	Recessive	-18.7135
13	1.6209	162.089	Recessive	-18.6671
13	1.6309	163.089	Recessive	-17.745
13	1.6409	164.089	Recessive	-17.6192
13	1.6509	165.089	Recessive	-18.1641
13	1.6609	166.089	Recessive	-17.2
13	1.6709	167.089	Recessive	-18.5304
13	1.6809	168.089	Recessive	-18.4757
13	1.6909	169.089	Recessive	-18.7159
13	1.7009	170.089	Recessive	-18.6123
13	1.7109	171.089	Recessive	-11.8586
13	1.7209	172.089	Recessive	-11.4413
13	1.7309	173.089	Recessive	-18.1647
13	1.7409	174.089	Recessive	-9.6302
13	1.7509	175.089	Recessive	-16.9549
13	1.7609	176.089	Recessive	-14.7988
13	1.7709	177.089	Recessive	-12.8579
13	1.7809	178.089	Recessive	-13.6353
13	1.7909	179.089	Recessive	-18.3111
13	1.8009	180.089	Recessive	-13.893
13	1.8109	181.089	Recessive	-18.0195
13	1.8209	182.089	Recessive	-16.1165
13	1.8309	183.089	Recessive	-18.4337
13	1.8409	184.089	Recessive	-18.3734
13	1.8509	185.089	Recessive	-16.1954
13	1.8609	186.089	Recessive	-12.9806
13	1.8709	187.089	Recessive	-12.703
13	1.8809	188.089	Recessive	-13.8383
13	1.8909	189.089	Recessive	-8.8417
13	1.9009	190.089	Recessive	-18.4827
13	1.9109	191.089	Recessive	-14.4138
13	1.9209	192.089	Recessive	-13.8814
13	1.9309	193.089	Recessive	-14.6819
13	1.9409	194.089	Recessive	-13.9479
13	1.9509	195.089	Recessive	-18.2831
13	1.9609	196.089	Recessive	-18.0117
13	1.9709	197.089	Recessive	-13.283
13	1.9809	198.089	Recessive	-14.1435
13	1.9909	199.089	Recessive	-15.517
13	2.0009	200.089	Recessive	-10.6722
13	2.0109	201.089	Recessive	-8.9857
13	2.0209	202.089	Recessive	-17.597
13	2.0309	203.089	Recessive	-10.6784
13	2.0409	204.089	Recessive	-11.6502
13	2.0509	205.089	Recessive	-12.8783
13	2.0609	206.089	Recessive	-7.8497
13	2.0709	207.089	Recessive	-11.583
13	2.0809	208.089	Recessive	-12.3848
13	2.0909	209.089	Recessive	-13.4282
13	2.1009	210.089	Recessive	-13.5568
13	2.1109	211.089	Recessive	-15.1613
13	2.1209	212.089	Recessive	-10.2471
13	2.1309	213.089	Recessive	-12.9349
13	2.1409	214.089	Recessive	-18.4509
13	2.1509	215.089	Recessive	-17.6418
13	2.1609	216.089	Recessive	-15.1955
13	2.1709	217.089	Recessive	-11.5203
13	2.1809	218.089	Recessive	-5.5228
13	2.1909	219.089	Recessive	-4.2067
14	0.0025	0.247	Recessive	-7.9028
14	0.0125	1.247	Recessive	-11.3403
14	0.0225	2.247	Recessive	-15.9888
14	0.0325	3.247	Recessive	-0.0841
14	0.0425	4.247	Recessive	-0.8508
14	0.0525	5.247	Recessive	-14.562
14	0.0625	6.247	Recessive	-8.646
14	0.0725	7.247	Recessive	-18.6331
14	0.0825	8.247	Recessive	-4.9881
14	0.0925	9.247	Recessive	-7.8995
14	0.1025	10.247	Recessive	-10.1225
14	0.1125	11.247	Recessive	-18.62
14	0.1225	12.247	Recessive	-18.6598
14	0.1325	13.247	Recessive	-14.2606
14	0.1425	14.247	Recessive	-14.1697
14	0.1525	15.247	Recessive	-13.9465
14	0.1625	16.247	Recessive	-13.2874
14	0.1725	17.247	Recessive	-18.7029
14	0.1825	18.247	Recessive	-18.0924
14	0.1925	19.247	Recessive	-18.7128
14	0.2025	20.247	Recessive	-14.3531
14	0.2125	21.247	Recessive	-18.2387
14	0.2225	22.247	Recessive	-18.4935
14	0.2325	23.247	Recessive	-10.6936
14	0.2425	24.247	Recessive	-10.2069
14	0.2525	25.247	Recessive	-13.9707
14	0.2625	26.247	Recessive	-14.8873
14	0.2725	27.247	Recessive	-12.4554
14	0.2825	28.247	Recessive	-10.4441
14	0.2925	29.247	Recessive	-8.7286
14	0.3025	30.247	Recessive	-12.8664
14	0.3125	31.247	Recessive	-7.8346
14	0.3225	32.247	Recessive	-5.9957
14	0.3325	33.247	Recessive	-14.8938
14	0.3425	34.247	Recessive	-12.201
14	0.3525	35.247	Recessive	-11.7579
14	0.3625	36.247	Recessive	-12.7881
14	0.3725	37.247	Recessive	-13.1127
14	0.3825	38.247	Recessive	-13.1112
14	0.3925	39.247	Recessive	-13.013
14	0.4025	40.247	Recessive	-12.3903
14	0.4125	41.247	Recessive	-14.263
14	0.4225	42.247	Recessive	-11.887
14	0.4325	43.247	Recessive	-13.4409
14	0.4425	44.247	Recessive	-13.2132
14	0.4525	45.247	Recessive	-13.8917
14	0.4625	46.247	Recessive	-13.3442
14	0.4725	47.247	Recessive	-13.3887
14	0.4825	48.247	Recessive	-9.7436
14	0.4925	49.247	Recessive	-8.4321
14	0.5025	50.247	Recessive	-7.9907
14	0.5125	51.247	Recessive	-7.9345
14	0.5225	52.247	Recessive	-7.9694
14	0.5325	53.247	Recessive	-8.3168
14	0.5425	54.247	Recessive	-9.0587
14	0.5525	55.247	Recessive	-13.0777
14	0.5625	56.247	Recessive	-14.1142
14	0.5725	57.247	Recessive	-11.7687
14	0.5825	58.247	Recessive	-13.5912
14	0.5925	59.247	Recessive	-11.8957
14	0.6025	60.247	Recessive	-11.4774
14	0.6125	61.247	Recessive	-12.1892
[truncated: 473 more rows]
