# Supplementary figures and images for: Pilot study of large-scale production of mutant pigs by ENU mutagenesis
Source: eLife journal article supplement (doi:10.7554/elife.26248), 2017-06-22

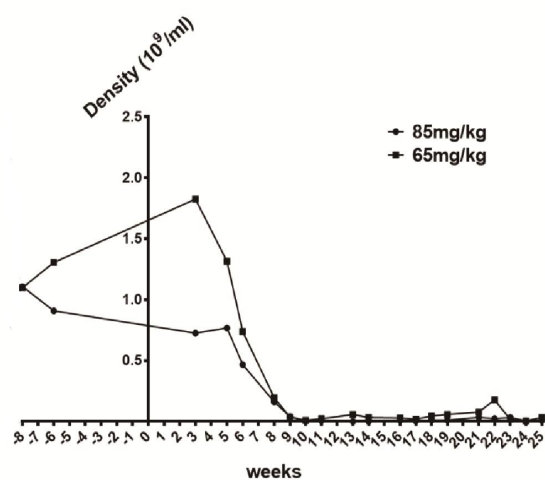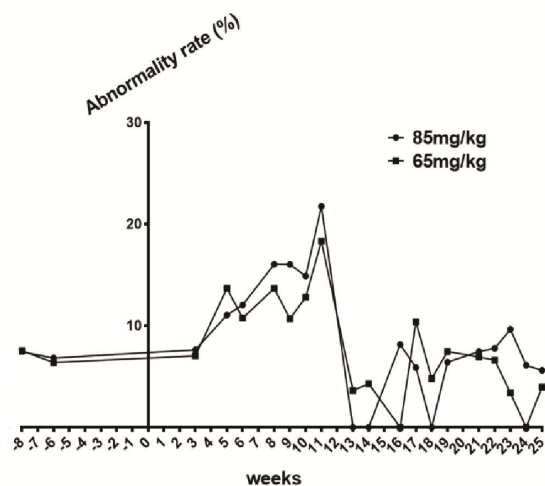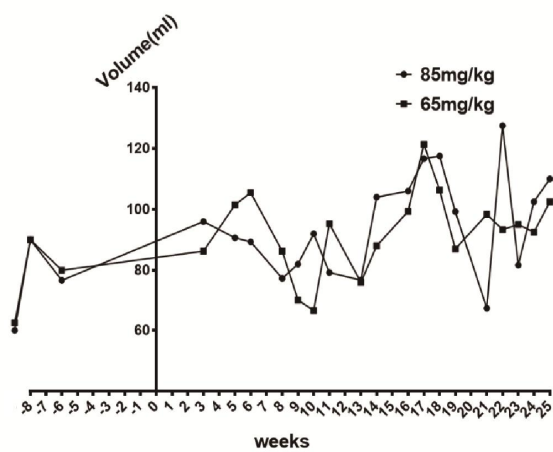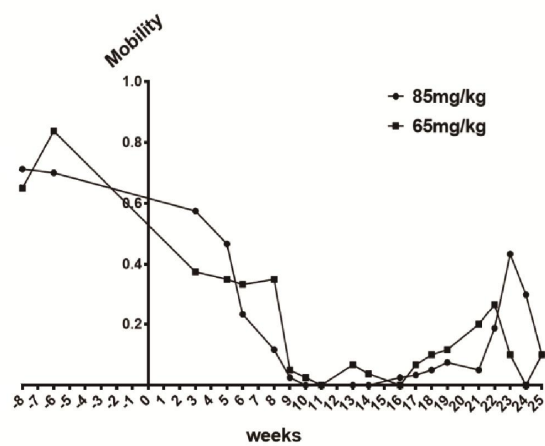

Figure 1-supplement

Supplement: supp [file elife_poa_e26248_Figure_1_figure_supplement.pdf › elife_poa_e26248_Figure_1_figure_supplement.pdf]

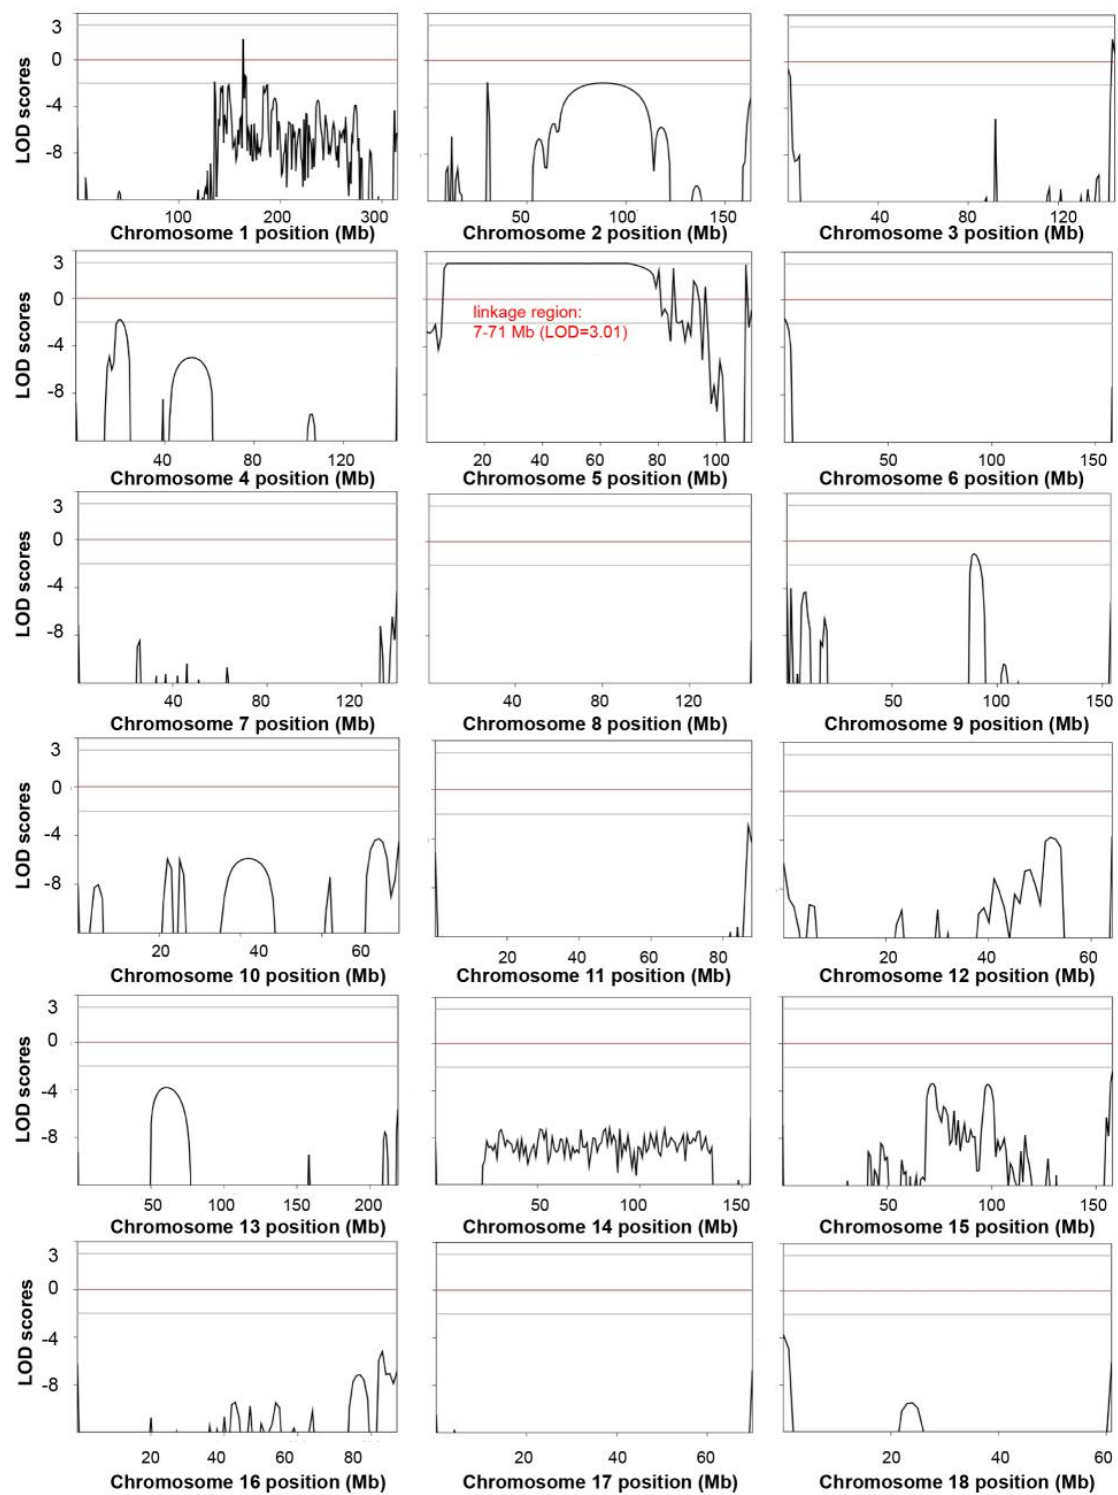

Figure 4-supplement 1

Supplement: supp [file elife_poa_e26248_Figure_4_figure_supplement_1.pdf › elife_poa_e26248_Figure_4_figure_supplement_1.pdf]

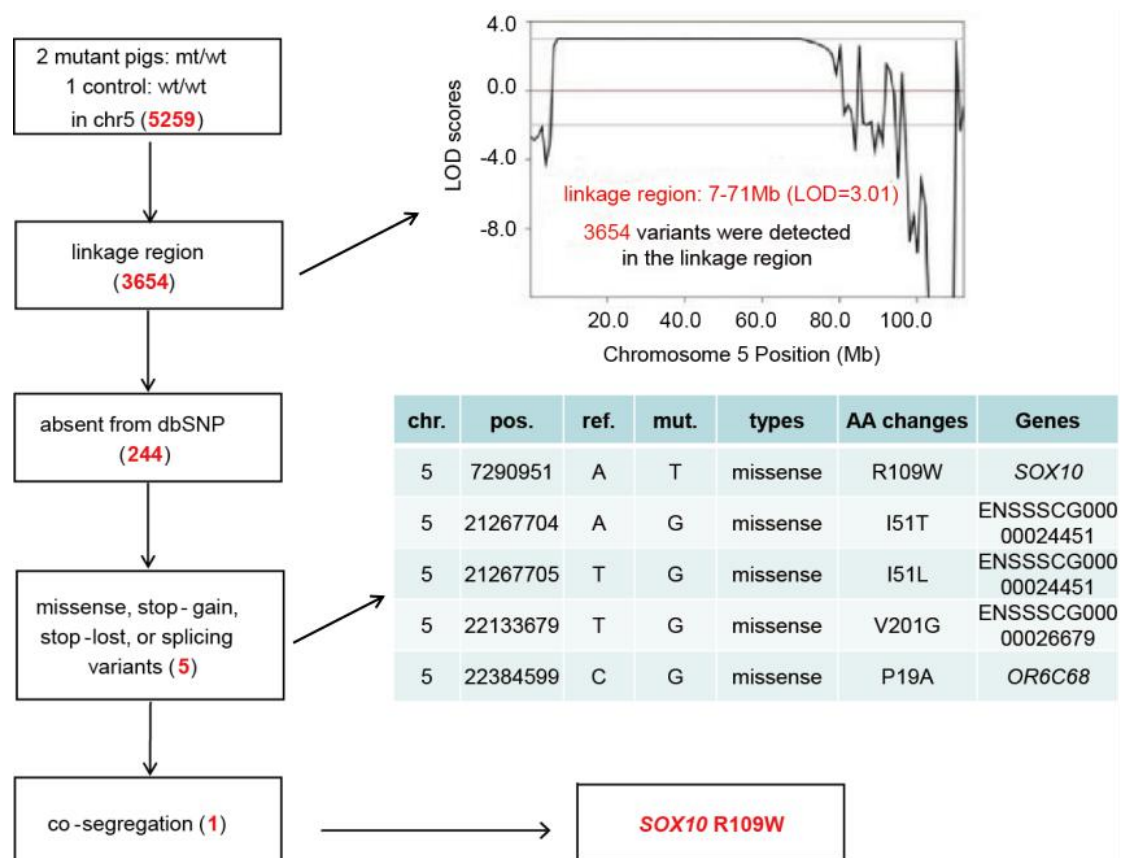

Figure 4-supplement 2

Supplement: supp [file elife_poa_e26248_Figure_4_figure_supplement_2.pdf › elife_poa_e26248_Figure_4_figure_supplement_2.pdf]

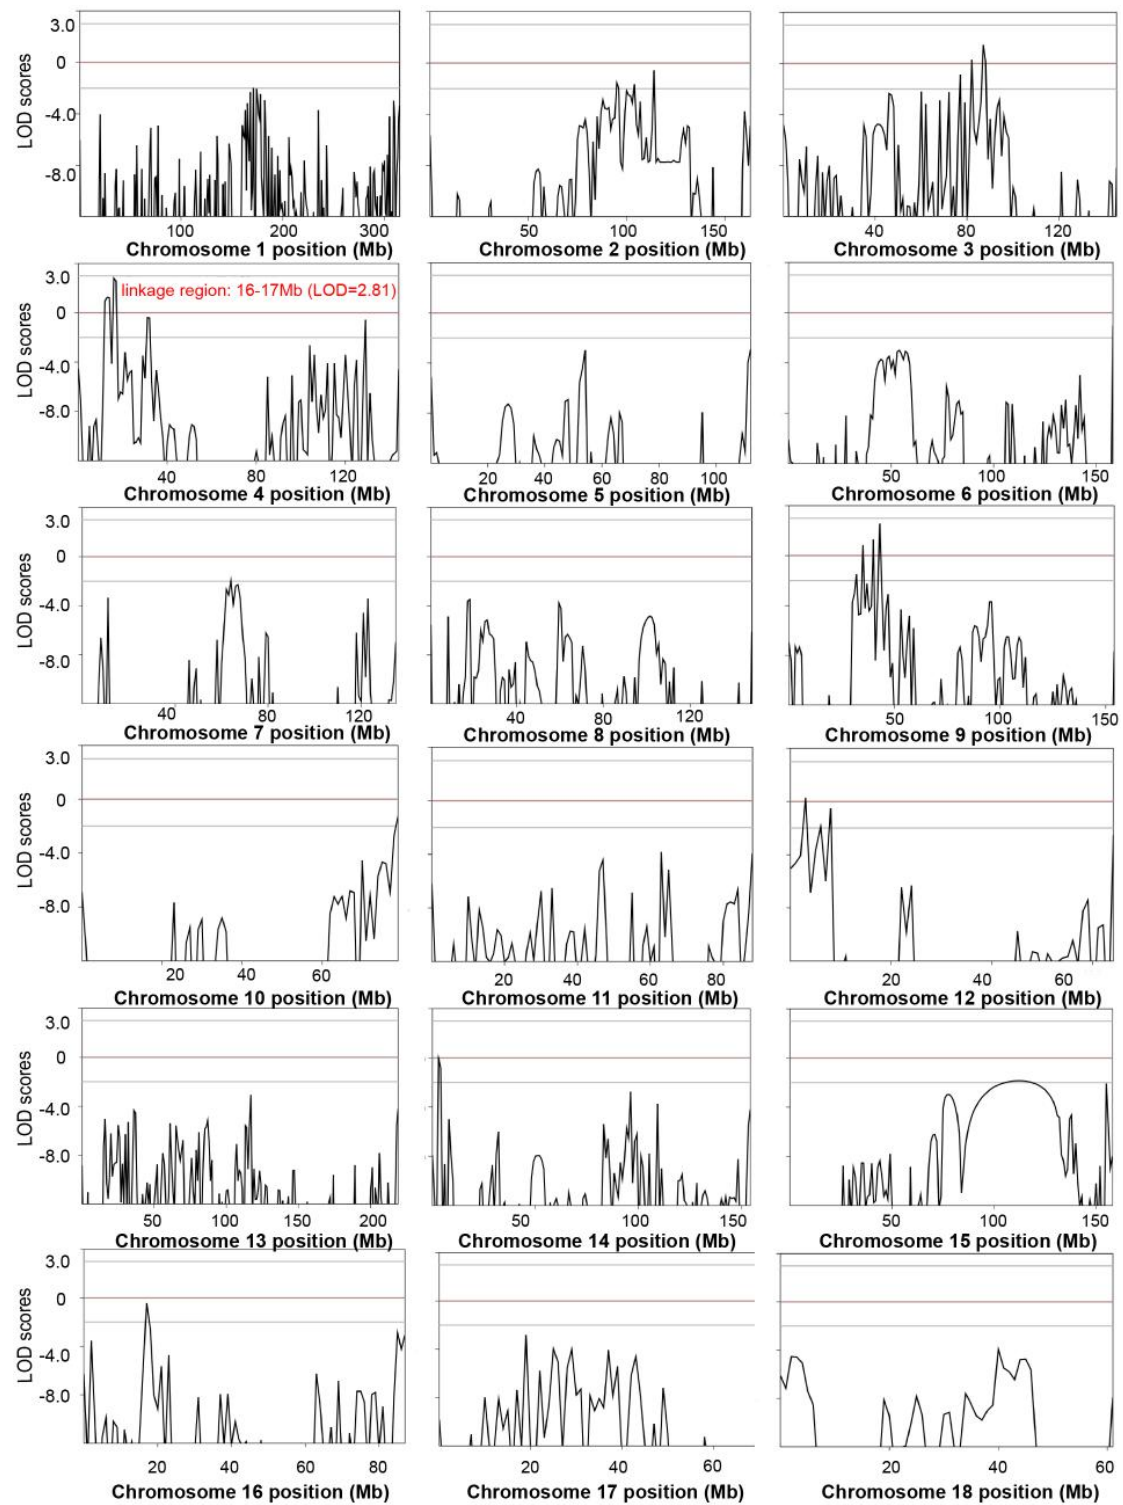

**Figure 5-supplement**

Supplement: supp [file elife_poa_e26248_Figure_5_figure_supplement.pdf › elife_poa_e26248_Figure_5_figure_supplement.pdf]
